# Supplementary material
Source: PubMed Central journal article supplement (PMC8480062)
Supplement: 12916_2021_2133_MOESM1_ESM.pdf [file 12916_2021_2133_MOESM1_ESM.pdf]

Additional file 1 for: “SOCRATES-CoMix: A platform for timely and open-source contact mixing data during and in between COVID-19 surges and interventions in over 20 European countries”

Frederik Verelst<sup>1</sup>, Lisa Hermans<sup>2\*</sup>, Sarah Vercruyssen<sup>2</sup>, Amy Gimma<sup>3</sup>, Pietro Coletti<sup>2</sup>, Jantien A Backer<sup>4</sup>, Kerry LM Wong<sup>3</sup>, James Wambua<sup>2</sup>, Kevin van Zandvoort<sup>3</sup>, Lander Willem<sup>1</sup>, Laurens Bogaardt<sup>4</sup>, Christel Faes<sup>2</sup>, Christopher I Jarvis<sup>3</sup>, Jacco Wallinga<sup>4,5</sup>, W John Edmunds<sup>3</sup>, Philippe Beutels<sup>1,6</sup>, Niel Hens<sup>1,2</sup>

**1** Centre for Health Economics Research and Modelling Infectious Diseases, Vaccine and Infectious Disease Institute, University of Antwerp, Antwerp, Belgium

**2** Data Science Institute and I-BioStat, Hasselt University, Hasselt, Belgium

**3** London School of Hygiene and Tropical Medicine, London, UK

**4** Centre for Infectious Disease Control, National Institute for Public Health and the Environment, Bilthoven, the Netherlands

**5** Dept Biomedical Data Sciences, Leiden University Medical Center, Leiden, the Netherlands

**6** School of Public Health and Community Medicine, The University of New South Wales, Sydney, Australia

\*Corresponding author: Lisa Hermans, [lisa.hermans@uhasselt.be](mailto:lisa.hermans@uhasselt.be)

## Contents

|          |                                                                                    |          |
|----------|------------------------------------------------------------------------------------|----------|
| <b>1</b> | <b>Additional file 1 : CoMix sample characteristics by country and survey wave</b> | <b>3</b> |
| 1.1      | United Kingdom . . . . .                                                           | 4        |
| 1.2      | Belgium . . . . .                                                                  | 14       |
| 1.3      | The Netherlands . . . . .                                                          | 16       |
| 1.4      | France . . . . .                                                                   | 20       |
| 1.5      | Italy . . . . .                                                                    | 21       |
| 1.6      | Spain . . . . .                                                                    | 22       |
| 1.7      | Austria . . . . .                                                                  | 23       |
| 1.8      | Denmark . . . . .                                                                  | 24       |
| 1.9      | Poland . . . . .                                                                   | 25       |
| 1.10     | Portugal . . . . .                                                                 | 26       |
| 1.11     | Greece . . . . .                                                                   | 27       |
| 1.12     | Slovenia . . . . .                                                                 | 28       |
| 1.13     | Croatia . . . . .                                                                  | 29       |
| 1.14     | Estonia . . . . .                                                                  | 30       |
| 1.15     | Hungary . . . . .                                                                  | 31       |
| 1.16     | Malta . . . . .                                                                    | 32       |
| 1.17     | Slovakia . . . . .                                                                 | 33       |
| 1.18     | Norway . . . . .                                                                   | 34       |
| 1.19     | Germany . . . . .                                                                  | 35       |

## **1 Additional file 1 : CoMix sample characteristics by country and survey wave**

This additional file provides sample characteristics of CoMix waves that were already collected and of which the data has been delivered. Sample characteristics may deviate from the ones reported in other CoMix studies as a result of data cleaning or other post-collection corrections. CoMix data collection in Finland, Switzerland and Lithuania was postponed to summer 2021 due to an issue in the data collection. Hence, no sample characteristics are reported for these three countries.

## 1.1 United Kingdom

**Table S1. CoMix sample characteristics for the United Kingdom.**

| Characteristic         | Wave A 1     | Wave A 2    | Wave A 3    | Wave A 4    | Wave A 5    | Wave A 6    | Wave A 7    | Wave C 7    | Wave A 8    | Wave C 8    |
|------------------------|--------------|-------------|-------------|-------------|-------------|-------------|-------------|-------------|-------------|-------------|
| <b>All</b>             | 1816         | 1560        | 1326        | 1326        | 1144        | 1127        | 1435        | 750         | 1146        | 507         |
| <b>Age</b>             |              |             |             |             |             |             |             |             |             |             |
| 0-4                    | NA           | NA          | NA          | NA          | NA          | NA          | NA          | 104 (13.9%) | NA          | 92 (18.1%)  |
| 5-11                   | NA           | NA          | NA          | NA          | NA          | NA          | NA          | 264 (35.2%) | NA          | 180 (35.5%) |
| 12-17                  | NA           | NA          | NA          | NA          | NA          | NA          | NA          | 371 (49.5%) | NA          | 223 (44%)   |
| 18-29                  | 275 (15.1%)  | 200 (12.8%) | 145 (10.9%) | 129 (9.7%)  | 128 (11.2%) | 76 (6.7%)   | 137 (9.5%)  | NA          | 132 (11.5%) | NA          |
| 30-39                  | 334 (18.4%)  | 233 (14.9%) | 215 (16.2%) | 169 (12.7%) | 179 (15.6%) | 137 (12.2%) | 248 (17.3%) | NA          | 130 (11.3%) | NA          |
| 40-49                  | 297 (16.4%)  | 306 (19.6%) | 210 (15.8%) | 258 (19.5%) | 210 (18.4%) | 217 (19.3%) | 239 (16.7%) | NA          | 214 (18.7%) | NA          |
| 50-59                  | 295 (16.2%)  | 322 (20.6%) | 249 (18.8%) | 300 (22.6%) | 194 (17%)   | 266 (23.6%) | 245 (17.1%) | NA          | 249 (21.7%) | NA          |
| 60-69                  | 422 (23.2%)  | 248 (15.9%) | 354 (26.7%) | 233 (17.6%) | 306 (26.7%) | 210 (18.6%) | 384 (26.8%) | NA          | 205 (17.9%) | NA          |
| 70+                    | 193 (10.6%)  | 251 (16.1%) | 153 (11.5%) | 237 (17.9%) | 127 (11.1%) | 221 (19.6%) | 182 (12.7%) | NA          | 216 (18.8%) | NA          |
| Unknown age            | NA           | NA          | NA          | NA          | NA          | NA          | NA          | 11 (1.5%)   | NA          | 12 (2.4%)   |
| <b>Gender</b>          |              |             |             |             |             |             |             |             |             |             |
| Female                 | 878 (48.3%)  | 851 (54.6%) | 642 (48.4%) | 723 (54.5%) | 544 (47.6%) | 618 (54.8%) | 692 (48.2%) | 352 (46.9%) | 634 (55.3%) | 247 (48.7%) |
| Male                   | 932 (51.3%)  | 697 (44.7%) | 680 (51.3%) | 599 (45.2%) | 598 (52.3%) | 504 (44.7%) | 739 (51.5%) | 396 (52.8%) | 506 (44.2%) | 256 (50.5%) |
| Other                  | 6 (0.3%)     | 12 (0.8%)   | 4 (0.3%)    | 4 (0.3%)    | 2 (0.2%)    | 5 (0.4%)    | 4 (0.3%)    | 2 (0.3%)    | 6 (0.5%)    | 4 (0.8%)    |
| <b>Day</b>             |              |             |             |             |             |             |             |             |             |             |
| Sunday                 | 5 (0.3%)     | 162 (10.4%) | 11 (0.8%)   | 34 (2.6%)   | 49 (4.3%)   | 29 (2.6%)   | 29 (2%)     | 36 (4.8%)   | NA          | 58 (11.4%)  |
| Monday                 | 8 (0.4%)     | 314 (20.1%) | 37 (2.8%)   | 45 (3.4%)   | 17 (1.5%)   | 151 (13.4%) | 20 (1.4%)   | 37 (4.9%)   | 90 (7.9%)   | 41 (8.1%)   |
| Tuesday                | 558 (30.7%)  | 170 (10.9%) | 310 (23.4%) | 112 (8.4%)  | NA          | 24 (2.1%)   | 835 (58.2%) | 82 (10.9%)  | 63 (5.5%)   | 21 (4.1%)   |
| Wednesday              | 1025 (56.4%) | 95 (6.1%)   | 756 (57%)   | 27 (2%)     | NA          | 86 (7.6%)   | 208 (14.5%) | 127 (16.9%) | 34 (3%)     | 21 (4.1%)   |
| Thursday               | 162 (8.9%)   | 256 (16.4%) | 111 (8.4%)  | 383 (28.9%) | 87 (7.6%)   | 89 (7.9%)   | 244 (17%)   | 14 (1.9%)   | 216 (18.8%) | 80 (15.8%)  |
| Friday                 | 36 (2%)      | 383 (24.6%) | 72 (5.4%)   | 647 (48.8%) | 869 (76%)   | 695 (61.7%) | 60 (4.2%)   | 21 (2.8%)   | 666 (58.1%) | 202 (39.8%) |
| Saturday               | 22 (1.2%)    | 180 (11.5%) | 29 (2.2%)   | 78 (5.9%)   | 122 (10.7%) | 53 (4.7%)   | 39 (2.7%)   | 433 (57.7%) | 77 (6.7%)   | 84 (16.6%)  |
| <b>Data collection</b> |              |             |             |             |             |             |             |             |             |             |
| First day              | 24 Mar 20    | 02 Apr 20   | 07 Apr 20   | 16 Apr 20   | 23 Apr 20   | 30 Apr 20   | 05 May 20   | 09 May 20   | 14 May 20   | 15 May 20   |
| Last day               | 01 Apr 20    | 10 Apr 20   | 15 Apr 20   | 24 Apr 20   | 27 Apr 20   | 07 May 20   | 12 May 20   | 18 May 20   | 21 May 20   | 25 May 20   |
| <b>Household size</b>  |              |             |             |             |             |             |             |             |             |             |
| 1                      | 286 (15.7%)  | 289 (18.5%) | 272 (20.5%) | 291 (21.9%) | 244 (21.3%) | 259 (23%)   | 301 (21%)   | NA          | 259 (22.6%) | NA          |
| 2                      | 596 (32.8%)  | 521 (33.4%) | 486 (36.7%) | 479 (36.1%) | 432 (37.8%) | 426 (37.8%) | 581 (40.5%) | 23 (3.1%)   | 439 (38.3%) | 20 (3.9%)   |
| 3-5                    | 867 (47.7%)  | 704 (45.1%) | 533 (40.2%) | 524 (39.5%) | 441 (38.5%) | 423 (37.5%) | 521 (36.3%) | 634 (84.5%) | 432 (37.7%) | 445 (87.8%) |
| 6+                     | 67 (3.7%)    | 46 (2.9%)   | 35 (2.6%)   | 32 (2.4%)   | 27 (2.4%)   | 19 (1.7%)   | 32 (2.2%)   | 93 (12.4%)  | 16 (1.4%)   | 42 (8.3%)   |
| <b>Panel</b>           | A            | B           | A           | B           | A           | B           | A           | C           | B           | D           |

Note: Wave A refers to CoMix surveys collecting behavioural data for adults whereas Wave C refers to CoMix surveys collecting behavioural data from adults responding on behalf of a randomly selected child.

Table S1 (continued) CoMix sample characteristics for the United Kingdom.

| Characteristic         | Wave A 9    | Wave C 9    | Wave A 10   | Wave C 10   | Wave A 11   | Wave C 11   | Wave A 12   | Wave C 12   | Wave A 13   | Wave C 13   |
|------------------------|-------------|-------------|-------------|-------------|-------------|-------------|-------------|-------------|-------------|-------------|
| <b>All</b>             | 1415        | 512         | 1082        | 359         | 1339        | 511         | 996         | 305         | 1335        | 509         |
| <b>Age</b>             |             |             |             |             |             |             |             |             |             |             |
| 0-4                    | NA          | 63 (12.3%)  | NA          | 61 (17%)    | NA          | 58 (11.4%)  | NA          | 44 (14.4%)  | NA          | 65 (12.8%)  |
| 5-11                   | NA          | 166 (32.4%) | NA          | 125 (34.8%) | NA          | 164 (32.1%) | NA          | 107 (35.1%) | NA          | 167 (32.8%) |
| 12-17                  | NA          | 259 (50.6%) | NA          | 155 (43.2%) | NA          | 260 (50.9%) | NA          | 139 (45.6%) | NA          | 256 (50.3%) |
| 18-29                  | 131 (9.3%)  | NA          | 100 (9.2%)  | NA          | 114 (8.5%)  | NA          | 86 (8.6%)   | NA          | 117 (8.8%)  | NA          |
| 30-39                  | 229 (16.2%) | NA          | 131 (12.1%) | NA          | 221 (16.5%) | NA          | 105 (10.5%) | NA          | 215 (16.1%) | NA          |
| 40-49                  | 244 (17.2%) | NA          | 207 (19.1%) | NA          | 224 (16.7%) | NA          | 203 (20.4%) | NA          | 218 (16.3%) | NA          |
| 50-59                  | 254 (18%)   | NA          | 243 (22.5%) | NA          | 240 (17.9%) | NA          | 243 (24.4%) | NA          | 241 (18.1%) | NA          |
| 60-69                  | 382 (27%)   | NA          | 202 (18.7%) | NA          | 366 (27.3%) | NA          | 184 (18.5%) | NA          | 368 (27.6%) | NA          |
| 70+                    | 175 (12.4%) | NA          | 199 (18.4%) | NA          | 174 (13%)   | NA          | 175 (17.6%) | NA          | 176 (13.2%) | NA          |
| Unknown age            | NA          | 24 (4.7%)   | NA          | 18 (5%)     | NA          | 29 (5.7%)   | NA          | 15 (4.9%)   | NA          | 21 (4.1%)   |
| <b>Gender</b>          |             |             |             |             |             |             |             |             |             |             |
| Female                 | 691 (48.8%) | 234 (45.7%) | 599 (55.4%) | 171 (47.6%) | 643 (48%)   | 238 (46.6%) | 538 (54%)   | 141 (46.2%) | 637 (47.7%) | 246 (48.3%) |
| Male                   | 718 (50.7%) | 277 (54.1%) | 479 (44.3%) | 187 (52.1%) | 693 (51.8%) | 270 (52.8%) | 455 (45.7%) | 163 (53.4%) | 693 (51.9%) | 263 (51.7%) |
| Other                  | 6 (0.4%)    | 1 (0.2%)    | 4 (0.4%)    | 1 (0.3%)    | 3 (0.2%)    | 3 (0.6%)    | 3 (0.3%)    | 1 (0.3%)    | 5 (0.4%)    | NA          |
| <b>Day</b>             |             |             |             |             |             |             |             |             |             |             |
| Sunday                 | 28 (2%)     | 70 (13.7%)  | 45 (4.2%)   | 25 (7%)     | 32 (2.4%)   | 63 (12.3%)  | 28 (2.8%)   | 18 (5.9%)   | 18 (1.3%)   | 10 (2%)     |
| Monday                 | 81 (5.7%)   | 33 (6.4%)   | 20 (1.8%)   | 26 (7.2%)   | 35 (2.6%)   | 180 (35.2%) | 11 (1.1%)   | 11 (3.6%)   | 92 (6.9%)   | 20 (3.9%)   |
| Tuesday                | 40 (2.8%)   | 70 (13.7%)  | 94 (8.7%)   | 16 (4.5%)   | 20 (1.5%)   | 34 (6.7%)   | NA          | 1 (0.3%)    | 41 (3.1%)   | 40 (7.9%)   |
| Wednesday              | 35 (2.5%)   | 13 (2.5%)   | 27 (2.5%)   | 149 (41.5%) | 75 (5.6%)   | 48 (9.4%)   | 34 (3.4%)   | 53 (17.4%)  | 5 (0.4%)    | 13 (2.6%)   |
| Thursday               | 474 (33.5%) | 2 (0.4%)    | 291 (26.9%) | 25 (7%)     | 468 (35%)   | 1 (0.2%)    | 277 (27.8%) | 89 (29.2%)  | 483 (36.2%) | 182 (35.8%) |
| Friday                 | 657 (46.4%) | NA          | 491 (45.4%) | 81 (22.6%)  | 630 (47.1%) | 14 (2.7%)   | 559 (56.1%) | 105 (34.4%) | 635 (47.6%) | 214 (42%)   |
| Saturday               | 100 (7.1%)  | 324 (63.3%) | 114 (10.5%) | 37 (10.3%)  | 79 (5.9%)   | 171 (33.5%) | 87 (8.7%)   | 28 (9.2%)   | 61 (4.6%)   | 30 (5.9%)   |
| <b>Data collection</b> |             |             |             |             |             |             |             |             |             |             |
| First day              | 21 May 20   | 23 May 20   | 28 May 20   | 28 May 20   | 04 Jun 20   | 05 Jun 20   | 11 Jun 20   | 11 Jun 20   | 18 Jun 20   | 18 Jun 20   |
| Last day               | 28 May 20   | 28 May 20   | 03 Jun 20   | 04 Jun 20   | 11 Jun 20   | 11 Jun 20   | 18 Jun 20   | 17 Jun 20   | 24 Jun 20   | 24 Jun 20   |
| <b>Household size</b>  |             |             |             |             |             |             |             |             |             |             |
| 1                      | 298 (21.1%) | NA          | 257 (23.8%) | NA          | 283 (21.1%) | NA          | 243 (24.4%) | NA          | 295 (22.1%) | NA          |
| 2                      | 566 (40%)   | 15 (2.9%)   | 429 (39.6%) | 18 (5%)     | 571 (42.6%) | 12 (2.3%)   | 397 (39.9%) | 15 (4.9%)   | 566 (42.4%) | 14 (2.8%)   |
| 3-5                    | 528 (37.3%) | 439 (85.7%) | 378 (34.9%) | 311 (86.6%) | 465 (34.7%) | 441 (86.3%) | 340 (34.1%) | 265 (86.9%) | 448 (33.6%) | 439 (86.2%) |
| 6+                     | 23 (1.6%)   | 58 (11.3%)  | 18 (1.7%)   | 30 (8.4%)   | 20 (1.5%)   | 58 (11.4%)  | 16 (1.6%)   | 25 (8.2%)   | 26 (1.9%)   | 56 (11%)    |
| <b>Panel</b>           | A           | C           | B           | D           | A           | C           | B           | D           | A           | C           |

Note: Wave A refers to CoMix surveys collecting behavioural data for adults whereas Wave C refers to CoMix surveys collecting behavioural data from adults responding on behalf of a randomly selected child.

Table S1 (continued) CoMix sample characteristics for the United Kingdom.

| Characteristic         | Wave A 14   | Wave C 14   | Wave A 15   | Wave C 15   | Wave A 16   | Wave C 16   | Wave A 17   | Wave A 18   | Wave A 19   | Wave C 19   |
|------------------------|-------------|-------------|-------------|-------------|-------------|-------------|-------------|-------------|-------------|-------------|
| <b>All</b>             | 958         | 250         | 1326        | 516         | 959         | 200         | 1068        | 958         | 1236        | 437         |
| <b>Age</b>             |             |             |             |             |             |             |             |             |             |             |
| 0-4                    | NA          | 37 (14.8%)  | NA          | 66 (12.8%)  | NA          | 33 (16.5%)  | NA          | NA          | NA          | 49 (11.2%)  |
| 5-11                   | NA          | 82 (32.8%)  | NA          | 162 (31.4%) | NA          | 67 (33.5%)  | NA          | NA          | NA          | 137 (31.4%) |
| 12-17                  | NA          | 115 (46%)   | NA          | 267 (51.7%) | NA          | 89 (44.5%)  | NA          | NA          | NA          | 234 (53.5%) |
| 18-29                  | 72 (7.5%)   | NA          | 105 (7.9%)  | NA          | 76 (7.9%)   | NA          | 54 (5.1%)   | 79 (8.2%)   | 93 (7.5%)   | NA          |
| 30-39                  | 97 (10.1%)  | NA          | 219 (16.5%) | NA          | 113 (11.8%) | NA          | 154 (14.4%) | 114 (11.9%) | 196 (15.9%) | NA          |
| 40-49                  | 196 (20.5%) | NA          | 213 (16.1%) | NA          | 183 (19.1%) | NA          | 152 (14.2%) | 185 (19.3%) | 191 (15.5%) | NA          |
| 50-59                  | 220 (23%)   | NA          | 241 (18.2%) | NA          | 223 (23.3%) | NA          | 200 (18.7%) | 220 (23%)   | 235 (19%)   | NA          |
| 60-69                  | 179 (18.7%) | NA          | 371 (28%)   | NA          | 179 (18.7%) | NA          | 344 (32.2%) | 170 (17.7%) | 350 (28.3%) | NA          |
| 70+                    | 194 (20.3%) | NA          | 177 (13.3%) | NA          | 185 (19.3%) | NA          | 164 (15.4%) | 190 (19.8%) | 171 (13.8%) | NA          |
| Unknown age            | NA          | 16 (6.4%)   | NA          | 21 (4.1%)   | NA          | 11 (5.5%)   | NA          | NA          | NA          | 17 (3.9%)   |
| <b>Gender</b>          |             |             |             |             |             |             |             |             |             |             |
| Female                 | 503 (52.5%) | 124 (49.6%) | 638 (48.1%) | 239 (46.3%) | 523 (54.5%) | 87 (43.5%)  | 509 (47.7%) | 518 (54.1%) | 596 (48.2%) | 212 (48.5%) |
| Male                   | 452 (47.2%) | 125 (50%)   | 685 (51.7%) | 277 (53.7%) | 430 (44.8%) | 113 (56.5%) | 556 (52.1%) | 434 (45.3%) | 636 (51.5%) | 224 (51.3%) |
| Other                  | 3 (0.3%)    | 1 (0.4%)    | 3 (0.2%)    | NA          | 6 (0.6%)    | NA          | 3 (0.3%)    | 6 (0.6%)    | 4 (0.3%)    | 1 (0.2%)    |
| <b>Day</b>             |             |             |             |             |             |             |             |             |             |             |
| Sunday                 | 52 (5.4%)   | 14 (5.6%)   | 27 (2%)     | 19 (3.7%)   | 245 (25.5%) | 10 (5%)     | 258 (24.2%) | 46 (4.8%)   | 58 (4.7%)   | 10 (2.3%)   |
| Monday                 | 21 (2.2%)   | 30 (12%)    | 107 (8.1%)  | 47 (9.1%)   | 71 (7.4%)   | 19 (9.5%)   | 354 (33.1%) | 234 (24.4%) | 283 (22.9%) | 195 (44.6%) |
| Tuesday                | NA          | 6 (2.4%)    | 67 (5.1%)   | 21 (4.1%)   | 29 (3%)     | NA          | 42 (3.9%)   | 256 (26.7%) | 342 (27.7%) | 103 (23.6%) |
| Wednesday              | NA          | 43 (17.2%)  | 21 (1.6%)   | 14 (2.7%)   | NA          | 1 (0.5%)    | 158 (14.8%) | 58 (6.1%)   | 78 (6.3%)   | 53 (12.1%)  |
| Thursday               | 293 (30.6%) | 59 (23.6%)  | 447 (33.7%) | 161 (31.2%) | 251 (26.2%) | 74 (37%)    | 109 (10.2%) | 159 (16.6%) | 32 (2.6%)   | 36 (8.2%)   |
| Friday                 | 510 (53.2%) | 76 (30.4%)  | 586 (44.2%) | 218 (42.2%) | 183 (19.1%) | 68 (34%)    | 11 (1%)     | 145 (15.1%) | 315 (25.5%) | 30 (6.9%)   |
| Saturday               | 82 (8.6%)   | 22 (8.8%)   | 71 (5.4%)   | 36 (7%)     | 180 (18.8%) | 28 (14%)    | 136 (12.7%) | 60 (6.3%)   | 128 (10.4%) | 10 (2.3%)   |
| <b>Data collection</b> |             |             |             |             |             |             |             |             |             |             |
| First day              | 25 Jun 20   | 25 Jun 20   | 02 Jul 20   | 02 Jul 20   | 09 Jul 20   | 09 Jul 20   | 16 Jul 20   | 23 Jul 20   | 31 Jul 20   | 03 Aug 20   |
| Last day               | 29 Jun 20   | 01 Jul 20   | 08 Jul 20   | 09 Jul 20   | 14 Jul 20   | 16 Jul 20   | 23 Jul 20   | 29 Jul 20   | 07 Aug 20   | 09 Aug 20   |
| <b>Household size</b>  |             |             |             |             |             |             |             |             |             |             |
| 1                      | 235 (24.5%) | NA          | 301 (22.7%) | NA          | 252 (26.3%) | NA          | 285 (26.7%) | 252 (26.3%) | 288 (23.3%) | NA          |
| 2                      | 389 (40.6%) | 11 (4.4%)   | 574 (43.3%) | 16 (3.1%)   | 387 (40.4%) | 9 (4.5%)    | 499 (46.7%) | 382 (39.9%) | 525 (42.5%) | 15 (3.4%)   |
| 3-5                    | 319 (33.3%) | 218 (87.2%) | 430 (32.4%) | 439 (85.1%) | 313 (32.6%) | 175 (87.5%) | 270 (25.3%) | 311 (32.5%) | 409 (33.1%) | 375 (85.8%) |
| 6+                     | 15 (1.6%)   | 21 (8.4%)   | 21 (1.6%)   | 61 (11.8%)  | 7 (0.7%)    | 16 (8%)     | 14 (1.3%)   | 13 (1.4%)   | 14 (1.1%)   | 47 (10.8%)  |
| <b>Panel</b>           | B           | D           | A           | C           | B           | D           | A           | B           | A           | C           |

Note: Wave A refers to CoMix surveys collecting behavioural data for adults whereas Wave C refers to CoMix surveys collecting behavioural data from adults responding on behalf of a randomly selected child.

Table S1 (continued) CoMix sample characteristics for the United Kingdom.

| Characteristic         | Wave A 20    | Wave C 20   | Wave A 21    | Wave C 21   | Wave A 22    | Wave C 22   | Wave A 23    | Wave C 23   | Wave A 24    | Wave C 24   |
|------------------------|--------------|-------------|--------------|-------------|--------------|-------------|--------------|-------------|--------------|-------------|
| <b>All</b>             | 3039         | 759         | 3238         | 759         | 2483         | 557         | 2653         | 386         | 2066         | 516         |
| <b>Age</b>             |              |             |              |             |              |             |              |             |              |             |
| 0-4                    | NA           | 147 (19.4%) | NA           | 116 (15.3%) | NA           | 102 (18.3%) | NA           | 51 (13.2%)  | NA           | 102 (19.8%) |
| 5-11                   | NA           | 267 (35.2%) | NA           | 295 (38.9%) | NA           | 178 (32%)   | NA           | 143 (37%)   | NA           | 179 (34.7%) |
| 12-17                  | NA           | 316 (41.6%) | NA           | 325 (42.8%) | NA           | 235 (42.2%) | NA           | 171 (44.3%) | NA           | 192 (37.2%) |
| 18-29                  | 513 (16.9%)  | NA          | 554 (17.1%)  | NA          | 351 (14.1%)  | NA          | 368 (13.9%)  | NA          | 258 (12.5%)  | NA          |
| 30-39                  | 526 (17.3%)  | NA          | 552 (17%)    | NA          | 385 (15.5%)  | NA          | 400 (15.1%)  | NA          | 282 (13.6%)  | NA          |
| 40-49                  | 536 (17.6%)  | NA          | 500 (15.4%)  | NA          | 390 (15.7%)  | NA          | 412 (15.5%)  | NA          | 339 (16.4%)  | NA          |
| 50-59                  | 603 (19.8%)  | NA          | 630 (19.5%)  | NA          | 472 (19%)    | NA          | 545 (20.5%)  | NA          | 404 (19.6%)  | NA          |
| 60-69                  | 575 (18.9%)  | NA          | 564 (17.4%)  | NA          | 561 (22.6%)  | NA          | 520 (19.6%)  | NA          | 499 (24.2%)  | NA          |
| 70+                    | 286 (9.4%)   | NA          | 438 (13.5%)  | NA          | 324 (13%)    | NA          | 408 (15.4%)  | NA          | 284 (13.7%)  | NA          |
| Unknown age            | NA           | 29 (3.8%)   | NA           | 23 (3%)     | NA           | 42 (7.5%)   | NA           | 21 (5.4%)   | NA           | 43 (8.3%)   |
| <b>Gender</b>          |              |             |              |             |              |             |              |             |              |             |
| Female                 | 1600 (52.6%) | 344 (45.3%) | 1714 (52.9%) | 368 (48.5%) | 1320 (53.2%) | 248 (44.5%) | 1382 (52.1%) | 193 (50%)   | 1079 (52.2%) | 244 (47.3%) |
| Male                   | 1427 (47%)   | 412 (54.3%) | 1510 (46.6%) | 388 (51.1%) | 1160 (46.7%) | 307 (55.1%) | 1266 (47.7%) | 191 (49.5%) | 982 (47.5%)  | 270 (52.3%) |
| Other                  | 12 (0.4%)    | 3 (0.4%)    | 14 (0.4%)    | 3 (0.4%)    | 3 (0.1%)     | 2 (0.4%)    | 5 (0.2%)     | 2 (0.5%)    | 5 (0.2%)     | 2 (0.4%)    |
| <b>Day</b>             |              |             |              |             |              |             |              |             |              |             |
| Sunday                 | 14 (0.5%)    | 3 (0.4%)    | 275 (8.5%)   | 71 (9.4%)   | 26 (1%)      | 10 (1.8%)   | 58 (2.2%)    | 7 (1.8%)    | NA           | NA          |
| Monday                 | 928 (30.5%)  | 549 (72.3%) | 927 (28.6%)  | 211 (27.8%) | 133 (5.4%)   | 42 (7.5%)   | 1357 (51.1%) | 229 (59.3%) | 671 (32.5%)  | 191 (37%)   |
| Tuesday                | 602 (19.8%)  | 109 (14.4%) | 315 (9.7%)   | 59 (7.8%)   | 316 (12.7%)  | 75 (13.5%)  | 195 (7.4%)   | 49 (12.7%)  | 122 (5.9%)   | 21 (4.1%)   |
| Wednesday              | 749 (24.6%)  | 51 (6.7%)   | 21 (0.6%)    | 22 (2.9%)   | 1599 (64.4%) | 307 (55.1%) | 107 (4%)     | 22 (5.7%)   | 969 (46.9%)  | 134 (26%)   |
| Thursday               | 212 (7%)     | 16 (2.1%)   | 14 (0.4%)    | 14 (1.8%)   | 275 (11.1%)  | 74 (13.3%)  | 314 (11.8%)  | 3 (0.8%)    | 285 (13.8%)  | 168 (32.6%) |
| Friday                 | 473 (15.6%)  | 24 (3.2%)   | 1103 (34.1%) | 211 (27.8%) | 98 (3.9%)    | 36 (6.5%)   | 172 (6.5%)   | 31 (8%)     | 19 (0.9%)    | 2 (0.4%)    |
| Saturday               | 61 (2%)      | 7 (0.9%)    | 583 (18%)    | 171 (22.5%) | 36 (1.4%)    | 13 (2.3%)   | 450 (17%)    | 45 (11.7%)  | NA           | NA          |
| <b>Data collection</b> |              |             |              |             |              |             |              |             |              |             |
| First day              | 10 Aug 20    | 10 Aug 20   | 14 Aug 20    | 14 Aug 20   | 24 Aug 20    | 25 Aug 20   | 28 Aug 20    | 28 Aug 20   | 07 Sep 20    | 07 Sep 20   |
| Last day               | 19 Aug 20    | 18 Aug 20   | 25 Aug 20    | 24 Aug 20   | 02 Sep 20    | 02 Sep 20   | 04 Sep 20    | 04 Sep 20   | 11 Sep 20    | 11 Sep 20   |
| <b>Household size</b>  |              |             |              |             |              |             |              |             |              |             |
| 1                      | 673 (22.1%)  | NA          | 772 (23.8%)  | NA          | 590 (23.8%)  | NA          | 681 (25.7%)  | NA          | 513 (24.8%)  | NA          |
| 2                      | 1297 (42.7%) | 45 (5.9%)   | 1391 (43%)   | 46 (6.1%)   | 1104 (44.5%) | 28 (5%)     | 1189 (44.8%) | 17 (4.4%)   | 935 (45.3%)  | 28 (5.4%)   |
| 3-5                    | 1013 (33.3%) | 681 (89.7%) | 1034 (31.9%) | 673 (88.7%) | 754 (30.4%)  | 501 (89.9%) | 752 (28.3%)  | 350 (90.7%) | 591 (28.6%)  | 463 (89.7%) |
| 6+                     | 56 (1.8%)    | 33 (4.3%)   | 41 (1.3%)    | 40 (5.3%)   | 35 (1.4%)    | 28 (5%)     | 31 (1.2%)    | 19 (4.9%)   | 27 (1.3%)    | 25 (4.8%)   |
| <b>Panel</b>           | E            | E           | F            | F           | E            | E           | F            | F           | E            | E           |

Note: Wave A refers to CoMix surveys collecting behavioural data for adults whereas Wave C refers to CoMix surveys collecting behavioural data from adults responding on behalf of a randomly selected child.

Table S1 (continued) CoMix sample characteristics for the United Kingdom.

| Characteristic         | Wave A 25    | Wave C 25   | Wave A 26    | Wave C 26   | Wave A 27    | Wave C 27   | Wave A 28    | Wave C 28   | Wave A 29    | Wave C 29   |
|------------------------|--------------|-------------|--------------|-------------|--------------|-------------|--------------|-------------|--------------|-------------|
| <b>All</b>             | 2071         | 518         | 2592         | 675         | 2501         | 625         | 2216         | 554         | 2218         | 554         |
| <b>Age</b>             |              |             |              |             |              |             |              |             |              |             |
| 0-4                    | NA           | 74 (14.3%)  | NA           | 123 (18.2%) | NA           | 79 (12.6%)  | NA           | 102 (18.4%) | NA           | 91 (16.4%)  |
| 5-11                   | NA           | 201 (38.8%) | NA           | 229 (33.9%) | NA           | 227 (36.3%) | NA           | 198 (35.7%) | NA           | 196 (35.4%) |
| 12-17                  | NA           | 219 (42.3%) | NA           | 277 (41%)   | NA           | 285 (45.6%) | NA           | 206 (37.2%) | NA           | 241 (43.5%) |
| 18-29                  | 231 (11.2%)  | NA          | 372 (14.4%)  | NA          | 306 (12.2%)  | NA          | 331 (14.9%)  | NA          | 222 (10%)    | NA          |
| 30-39                  | 291 (14.1%)  | NA          | 395 (15.2%)  | NA          | 381 (15.2%)  | NA          | 318 (14.4%)  | NA          | 319 (14.4%)  | NA          |
| 40-49                  | 327 (15.8%)  | NA          | 440 (17%)    | NA          | 402 (16.1%)  | NA          | 394 (17.8%)  | NA          | 339 (15.3%)  | NA          |
| 50-59                  | 426 (20.6%)  | NA          | 487 (18.8%)  | NA          | 514 (20.6%)  | NA          | 388 (17.5%)  | NA          | 483 (21.8%)  | NA          |
| 60-69                  | 437 (21.1%)  | NA          | 567 (21.9%)  | NA          | 510 (20.4%)  | NA          | 546 (24.6%)  | NA          | 473 (21.3%)  | NA          |
| 70+                    | 359 (17.3%)  | NA          | 331 (12.8%)  | NA          | 388 (15.5%)  | NA          | 239 (10.8%)  | NA          | 382 (17.2%)  | NA          |
| Unknown age            | NA           | 24 (4.6%)   | NA           | 46 (6.8%)   | NA           | 34 (5.4%)   | NA           | 48 (8.7%)   | NA           | 26 (4.7%)   |
| <b>Gender</b>          |              |             |              |             |              |             |              |             |              |             |
| Female                 | 1066 (51.5%) | 258 (49.8%) | 1371 (52.9%) | 312 (46.2%) | 1306 (52.2%) | 331 (53%)   | 1152 (52%)   | 254 (45.8%) | 1157 (52.2%) | 278 (50.2%) |
| Male                   | 998 (48.2%)  | 259 (50%)   | 1216 (46.9%) | 359 (53.2%) | 1190 (47.6%) | 291 (46.6%) | 1052 (47.5%) | 297 (53.6%) | 1058 (47.7%) | 273 (49.3%) |
| Other                  | 7 (0.3%)     | 1 (0.2%)    | 5 (0.2%)     | 4 (0.6%)    | 5 (0.2%)     | 3 (0.5%)    | 12 (0.5%)    | 3 (0.5%)    | 3 (0.1%)     | 3 (0.5%)    |
| <b>Day</b>             |              |             |              |             |              |             |              |             |              |             |
| Sunday                 | 1 (0%)       | NA          | 118 (4.6%)   | 51 (7.6%)   | 160 (6.4%)   | 37 (5.9%)   | 121 (5.5%)   | 47 (8.5%)   | 26 (1.2%)    | 11 (2%)     |
| Monday                 | 680 (32.8%)  | 123 (23.7%) | 476 (18.4%)  | 162 (24%)   | 406 (16.2%)  | 100 (16%)   | 288 (13%)    | 69 (12.5%)  | 1185 (53.4%) | 242 (43.7%) |
| Tuesday                | 1109 (53.5%) | 157 (30.3%) | 111 (4.3%)   | 28 (4.1%)   | 418 (16.7%)  | 105 (16.8%) | 173 (7.8%)   | 40 (7.2%)   | 354 (16%)    | 90 (16.2%)  |
| Wednesday              | 241 (11.6%)  | 199 (38.4%) | NA           | NA          | NA           | 100 (16%)   | 85 (3.8%)    | NA          | 5 (0.2%)     | 65 (11.7%)  |
| Thursday               | 5 (0.2%)     | 28 (5.4%)   | 161 (6.2%)   | 32 (4.7%)   | NA           | 9 (1.4%)    | NA           | NA          | 129 (5.8%)   | 53 (9.6%)   |
| Friday                 | 30 (1.4%)    | 7 (1.4%)    | 1510 (58.3%) | 346 (51.3%) | 497 (19.9%)  | 96 (15.4%)  | 1194 (53.9%) | 313 (56.5%) | 455 (20.5%)  | 79 (14.3%)  |
| Saturday               | 5 (0.2%)     | 4 (0.8%)    | 216 (8.3%)   | 56 (8.3%)   | 1020 (40.8%) | 178 (28.5%) | 355 (16%)    | 85 (15.3%)  | 64 (2.9%)    | 14 (2.5%)   |
| <b>Data collection</b> |              |             |              |             |              |             |              |             |              |             |
| First day              | 11 Sep 20    | 11 Sep 20   | 17 Sep 20    | 17 Sep 20   | 25 Sep 20    | 25 Sep 20   | 02 Oct 20    | 02 Oct 20   | 08 Oct 20    | 08 Oct 20   |
| Last day               | 17 Sep 20    | 17 Sep 20   | 22 Sep 20    | 22 Sep 20   | 29 Sep 20    | 01 Oct 20   | 07 Oct 20    | 06 Oct 20   | 14 Oct 20    | 15 Oct 20   |
| <b>Household size</b>  |              |             |              |             |              |             |              |             |              |             |
| 1                      | 548 (26.5%)  | NA          | 628 (24.2%)  | NA          | 633 (25.3%)  | NA          | 527 (23.8%)  | NA          | 568 (25.6%)  | NA          |
| 2                      | 953 (46%)    | 31 (6%)     | 1146 (44.2%) | 40 (5.9%)   | 1135 (45.4%) | 43 (6.9%)   | 1030 (46.5%) | 29 (5.2%)   | 1040 (46.9%) | 31 (5.6%)   |
| 3-5                    | 549 (26.5%)  | 460 (88.8%) | 780 (30.1%)  | 602 (89.2%) | 703 (28.1%)  | 553 (88.5%) | 629 (28.4%)  | 499 (90.1%) | 586 (26.4%)  | 497 (89.7%) |
| 6+                     | 21 (1%)      | 27 (5.2%)   | 38 (1.5%)    | 33 (4.9%)   | 30 (1.2%)    | 29 (4.6%)   | 30 (1.4%)    | 26 (4.7%)   | 24 (1.1%)    | 26 (4.7%)   |
| <b>Panel</b>           | F            | F           | E            | E           | F            | F           | E            | E           | F            | F           |

Note: Wave A refers to CoMix surveys collecting behavioural data for adults whereas Wave C refers to CoMix surveys collecting behavioural data from adults responding on behalf of a randomly selected child.



Table S1 (continued) CoMix sample characteristics for the United Kingdom.

| Characteristic         | Wave A 30    | Wave C 30   | Wave A 31    | Wave C 31   | Wave A 32    | Wave C 32   | Wave A 33    | Wave C 33   | Wave A 34    | Wave C 34   |
|------------------------|--------------|-------------|--------------|-------------|--------------|-------------|--------------|-------------|--------------|-------------|
| <b>All</b>             | 2389         | 596         | 2377         | 597         | 2030         | 502         | 2034         | 508         | 2292         | 572         |
| <b>Age</b>             |              |             |              |             |              |             |              |             |              |             |
| 0-4                    | NA           | 112 (18.8%) | NA           | 89 (14.9%)  | NA           | 98 (19.5%)  | NA           | 81 (15.9%)  | NA           | 70 (12.2%)  |
| 5-11                   | NA           | 208 (34.9%) | NA           | 216 (36.2%) | NA           | 183 (36.5%) | NA           | 175 (34.4%) | NA           | 200 (35%)   |
| 12-17                  | NA           | 231 (38.8%) | NA           | 269 (45.1%) | NA           | 201 (40%)   | NA           | 225 (44.3%) | NA           | 273 (47.7%) |
| 18-29                  | 304 (12.7%)  | NA          | 260 (10.9%)  | NA          | 325 (16%)    | NA          | 184 (9%)     | NA          | 240 (10.5%)  | NA          |
| 30-39                  | 357 (14.9%)  | NA          | 335 (14.1%)  | NA          | 355 (17.5%)  | NA          | 273 (13.4%)  | NA          | 270 (11.8%)  | NA          |
| 40-49                  | 410 (17.2%)  | NA          | 373 (15.7%)  | NA          | 364 (17.9%)  | NA          | 315 (15.5%)  | NA          | 373 (16.3%)  | NA          |
| 50-59                  | 460 (19.3%)  | NA          | 499 (21%)    | NA          | 361 (17.8%)  | NA          | 433 (21.3%)  | NA          | 461 (20.1%)  | NA          |
| 60-69                  | 553 (23.1%)  | NA          | 510 (21.5%)  | NA          | 374 (18.4%)  | NA          | 451 (22.2%)  | NA          | 570 (24.9%)  | NA          |
| 70+                    | 305 (12.8%)  | NA          | 400 (16.8%)  | NA          | 251 (12.4%)  | NA          | 378 (18.6%)  | NA          | 378 (16.5%)  | NA          |
| Unknown age            | NA           | 45 (7.6%)   | NA           | 23 (3.9%)   | NA           | 20 (4%)     | NA           | 27 (5.3%)   | NA           | 29 (5.1%)   |
| <b>Gender</b>          |              |             |              |             |              |             |              |             |              |             |
| Female                 | 1256 (52.6%) | 276 (46.3%) | 1247 (52.5%) | 298 (49.9%) | 1078 (53.1%) | 244 (48.6%) | 1080 (53.1%) | 259 (51%)   | 1146 (50%)   | 275 (48.1%) |
| Male                   | 1129 (47.3%) | 319 (53.5%) | 1126 (47.4%) | 296 (49.6%) | 944 (46.5%)  | 257 (51.2%) | 947 (46.6%)  | 247 (48.6%) | 1143 (49.9%) | 293 (51.2%) |
| Other                  | 4 (0.2%)     | 1 (0.2%)    | 4 (0.2%)     | 3 (0.5%)    | 8 (0.4%)     | 1 (0.2%)    | 7 (0.3%)     | 2 (0.4%)    | 3 (0.1%)     | 4 (0.7%)    |
| <b>Day</b>             |              |             |              |             |              |             |              |             |              |             |
| Sunday                 | 131 (5.5%)   | 42 (7%)     | 706 (29.7%)  | 156 (26.1%) | 59 (2.9%)    | 28 (5.6%)   | 44 (2.2%)    | 15 (3%)     | 308 (13.4%)  | 38 (6.6%)   |
| Monday                 | 241 (10.1%)  | 64 (10.7%)  | 193 (8.1%)   | 57 (9.5%)   | 98 (4.8%)    | 32 (6.4%)   | 281 (13.8%)  | 72 (14.2%)  | 266 (11.6%)  | 56 (9.8%)   |
| Tuesday                | 662 (27.7%)  | 147 (24.7%) | 828 (34.8%)  | 152 (25.5%) | 60 (3%)      | 15 (3%)     | NA           | 104 (20.5%) | 52 (2.3%)    | 54 (9.4%)   |
| Wednesday              | 35 (1.5%)    | NA          | 417 (17.5%)  | 172 (28.8%) | 659 (32.5%)  | 166 (33.1%) | NA           | 3 (0.6%)    | NA           | 135 (23.6%) |
| Thursday               | NA           | NA          | 172 (7.2%)   | 43 (7.2%)   | 77 (3.8%)    | 39 (7.8%)   | 761 (37.4%)  | 147 (28.9%) | 594 (25.9%)  | 121 (21.2%) |
| Friday                 | 948 (39.7%)  | 247 (41.4%) | 50 (2.1%)    | 15 (2.5%)   | 822 (40.5%)  | 171 (34.1%) | 835 (41.1%)  | 144 (28.3%) | 544 (23.7%)  | 111 (19.4%) |
| Saturday               | 372 (15.6%)  | 96 (16.1%)  | 11 (0.5%)    | 2 (0.3%)    | 255 (12.6%)  | 51 (10.2%)  | 113 (5.6%)   | 23 (4.5%)   | 528 (23%)    | 57 (10%)    |
| <b>Data collection</b> |              |             |              |             |              |             |              |             |              |             |
| First day              | 16 Oct 20    | 16 Oct 20   | 23 Oct 20    | 23 Oct 20   | 30 Oct 20    | 30 Oct 20   | 05 Nov 20    | 05 Nov 20   | 12 Nov 20    | 12 Nov 20   |
| Last day               | 21 Oct 20    | 20 Oct 20   | 29 Oct 20    | 29 Oct 20   | 05 Nov 20    | 05 Nov 20   | 09 Nov 20    | 11 Nov 20   | 17 Nov 20    | 19 Nov 20   |
| <b>Household size</b>  |              |             |              |             |              |             |              |             |              |             |
| 1                      | 587 (24.6%)  | NA          | 623 (26.2%)  | NA          | 476 (23.4%)  | NA          | 554 (27.2%)  | NA          | 583 (25.4%)  | NA          |
| 2                      | 1105 (46.3%) | 29 (4.9%)   | 1121 (47.2%) | 40 (6.7%)   | 870 (42.9%)  | 38 (7.6%)   | 967 (47.5%)  | 28 (5.5%)   | 1099 (47.9%) | 42 (7.3%)   |
| 3-5                    | 670 (28%)    | 539 (90.4%) | 611 (25.7%)  | 530 (88.8%) | 645 (31.8%)  | 443 (88.2%) | 497 (24.4%)  | 455 (89.6%) | 585 (25.5%)  | 510 (89.2%) |
| 6+                     | 27 (1.1%)    | 28 (4.7%)   | 22 (0.9%)    | 27 (4.5%)   | 39 (1.9%)    | 21 (4.2%)   | 16 (0.8%)    | 25 (4.9%)   | 25 (1.1%)    | 20 (3.5%)   |
| <b>Panel</b>           | E            | E           | F            | F           | E            | E           | F            | F           | E            | E           |

Note: Wave A refers to CoMix surveys collecting behavioural data for adults whereas Wave C refers to CoMix surveys collecting behavioural data from adults responding on behalf of a randomly selected child.

**Table S1 (continued) CoMix sample characteristics for the United Kingdom.**

| Characteristic         | Wave A 35    | Wave C 35   | Wave A 36    | Wave C 36   | Wave A 37    | Wave C 37   | Wave A 38    | Wave C 38   | Wave A 39    | Wave C 39   |
|------------------------|--------------|-------------|--------------|-------------|--------------|-------------|--------------|-------------|--------------|-------------|
| <b>All</b>             | 2290         | 565         | 2174         | 544         | 2355         | 592         | 2434         | 611         | 2357         | 563         |
| <b>Age</b>             |              |             |              |             |              |             |              |             |              |             |
| 0-4                    | NA           | 82 (14.5%)  | NA           | 107 (19.7%) | NA           | 104 (17.6%) | NA           | 116 (19%)   | NA           | 54 (9.6%)   |
| 5-11                   | NA           | 201 (35.6%) | NA           | 188 (34.6%) | NA           | 223 (37.7%) | NA           | 205 (33.6%) | NA           | 200 (35.5%) |
| 12-17                  | NA           | 254 (45%)   | NA           | 224 (41.2%) | NA           | 237 (40%)   | NA           | 259 (42.4%) | NA           | 295 (52.4%) |
| 18-29                  | 225 (9.8%)   | NA          | 284 (13.1%)  | NA          | 368 (15.6%)  | NA          | 341 (14%)    | NA          | 304 (12.9%)  | NA          |
| 30-39                  | 317 (13.8%)  | NA          | 335 (15.4%)  | NA          | 387 (16.4%)  | NA          | 415 (17.1%)  | NA          | 351 (14.9%)  | NA          |
| 40-49                  | 364 (15.9%)  | NA          | 347 (16%)    | NA          | 391 (16.6%)  | NA          | 412 (16.9%)  | NA          | 392 (16.6%)  | NA          |
| 50-59                  | 490 (21.4%)  | NA          | 418 (19.2%)  | NA          | 456 (19.4%)  | NA          | 478 (19.6%)  | NA          | 494 (21%)    | NA          |
| 60-69                  | 493 (21.5%)  | NA          | 470 (21.6%)  | NA          | 435 (18.5%)  | NA          | 434 (17.8%)  | NA          | 489 (20.7%)  | NA          |
| 70+                    | 401 (17.5%)  | NA          | 320 (14.7%)  | NA          | 318 (13.5%)  | NA          | 354 (14.5%)  | NA          | 327 (13.9%)  | NA          |
| Unknown age            | NA           | 28 (5%)     | NA           | 25 (4.6%)   | NA           | 28 (4.7%)   | NA           | 31 (5.1%)   | NA           | 14 (2.5%)   |
| <b>Gender</b>          |              |             |              |             |              |             |              |             |              |             |
| Female                 | 1205 (52.6%) | 288 (51%)   | 1135 (52.2%) | 252 (46.3%) | 1204 (51.1%) | 298 (50.3%) | 1286 (52.8%) | 290 (47.5%) | 1232 (52.3%) | 265 (47.1%) |
| Male                   | 1081 (47.2%) | 275 (48.7%) | 1034 (47.6%) | 289 (53.1%) | 1140 (48.4%) | 293 (49.5%) | 1139 (46.8%) | 318 (52%)   | 1117 (47.4%) | 295 (52.4%) |
| Other                  | 4 (0.2%)     | 2 (0.4%)    | 5 (0.2%)     | 3 (0.6%)    | 11 (0.5%)    | 1 (0.2%)    | 9 (0.4%)     | 3 (0.5%)    | 8 (0.3%)     | 3 (0.5%)    |
| <b>Day</b>             |              |             |              |             |              |             |              |             |              |             |
| Sunday                 | 66 (2.9%)    | 25 (4.4%)   | 171 (7.9%)   | NA          | 40 (1.7%)    | 12 (2%)     | 120 (4.9%)   | 44 (7.2%)   | NA           | NA          |
| Monday                 | 306 (13.4%)  | 113 (20%)   | NA           | NA          | 208 (8.8%)   | 78 (13.2%)  | 195 (8%)     | 76 (12.4%)  | 917 (38.9%)  | 265 (47.1%) |
| Tuesday                | 57 (2.5%)    | 51 (9%)     | NA           | NA          | 590 (25.1%)  | 230 (38.9%) | 732 (30.1%)  | 35 (5.7%)   | 1184 (50.2%) | 256 (45.5%) |
| Wednesday              | NA           | NA          | NA           | NA          | 679 (28.8%)  | 13 (2.2%)   | 19 (0.8%)    | 3 (0.5%)    | 256 (10.9%)  | 42 (7.5%)   |
| Thursday               | 150 (6.6%)   | 8 (1.4%)    | 84 (3.9%)    | 35 (6.4%)   | 28 (1.2%)    | 7 (1.2%)    | 508 (20.9%)  | 222 (36.3%) | NA           | NA          |
| Friday                 | 1485 (64.8%) | 315 (55.8%) | 1678 (77.2%) | 458 (84.2%) | 728 (30.9%)  | 230 (38.9%) | 523 (21.5%)  | 168 (27.5%) | NA           | NA          |
| Saturday               | 226 (9.9%)   | 53 (9.4%)   | 241 (11.1%)  | 51 (9.4%)   | 82 (3.5%)    | 22 (3.7%)   | 337 (13.8%)  | 63 (10.3%)  | NA           | NA          |
| <b>Data collection</b> |              |             |              |             |              |             |              |             |              |             |
| First day              | 19 Nov 20    | 19 Nov 20   | 26 Nov 20    | 26 Nov 20   | 03 Dec 20    | 03 Dec 20   | 10 Dec 20    | 10 Dec 20   | 21 Dec 20    | 21 Dec 20   |
| Last day               | 24 Nov 20    | 24 Nov 20   | 29 Nov 20    | 28 Nov 20   | 09 Dec 20    | 09 Dec 20   | 16 Dec 20    | 16 Dec 20   | 23 Dec 20    | 23 Dec 20   |
| <b>Household size</b>  |              |             |              |             |              |             |              |             |              |             |
| 1                      | 600 (26.2%)  | NA          | 522 (24%)    | NA          | 575 (24.4%)  | NA          | 562 (23.1%)  | NA          | 568 (24.1%)  | NA          |
| 2                      | 1081 (47.2%) | 29 (5.1%)   | 997 (45.9%)  | 38 (7%)     | 1046 (44.4%) | 42 (7.1%)   | 1064 (43.7%) | 42 (6.9%)   | 1072 (45.5%) | 40 (7.1%)   |
| 3-5                    | 586 (25.6%)  | 516 (91.3%) | 632 (29.1%)  | 489 (89.9%) | 709 (30.1%)  | 520 (87.8%) | 768 (31.6%)  | 547 (89.5%) | 692 (29.4%)  | 492 (87.4%) |
| 6+                     | 23 (1%)      | 20 (3.5%)   | 23 (1.1%)    | 17 (3.1%)   | 25 (1.1%)    | 30 (5.1%)   | 40 (1.6%)    | 22 (3.6%)   | 25 (1.1%)    | 31 (5.5%)   |
| <b>Panel</b>           | F            | F           | E            | E           | F            | F           | E            | E           | F            | F           |

Note: Wave A refers to CoMix surveys collecting behavioural data for adults whereas Wave C refers to CoMix surveys collecting behavioural data from adults responding on behalf of a randomly selected child.

Table S1 (continued) CoMix sample characteristics for the United Kingdom.

| Characteristic         | Wave A 40    | Wave C 40   | Wave A 41    | Wave C 41   | Wave A 42    | Wave C 42   | Wave A 43    | Wave C 43   | Wave A 44    | Wave C 44   |
|------------------------|--------------|-------------|--------------|-------------|--------------|-------------|--------------|-------------|--------------|-------------|
| <b>All</b>             | 2549         | 638         | 2549         | 635         | 2014         | 502         | 2012         | 503         | 2000         | 501         |
| <b>Age</b>             |              |             |              |             |              |             |              |             |              |             |
| 0-4                    | NA           | 74 (11.6%)  | NA           | 58 (9.1%)   | NA           | 68 (13.5%)  | NA           | 67 (13.3%)  | NA           | 86 (17.2%)  |
| 5-11                   | NA           | 231 (36.2%) | NA           | 226 (35.6%) | NA           | 157 (31.3%) | NA           | 188 (37.4%) | NA           | 188 (37.5%) |
| 12-17                  | NA           | 311 (48.7%) | NA           | 322 (50.7%) | NA           | 253 (50.4%) | NA           | 220 (43.7%) | NA           | 208 (41.5%) |
| 18-29                  | 334 (13.1%)  | NA          | 339 (13.3%)  | NA          | 227 (11.3%)  | NA          | 425 (21.1%)  | NA          | 252 (12.6%)  | NA          |
| 30-39                  | 400 (15.7%)  | NA          | 420 (16.5%)  | NA          | 341 (16.9%)  | NA          | 416 (20.7%)  | NA          | 360 (18%)    | NA          |
| 40-49                  | 401 (15.7%)  | NA          | 412 (16.2%)  | NA          | 322 (16%)    | NA          | 324 (16.1%)  | NA          | 328 (16.4%)  | NA          |
| 50-59                  | 535 (21%)    | NA          | 512 (20.1%)  | NA          | 394 (19.6%)  | NA          | 347 (17.2%)  | NA          | 399 (20%)    | NA          |
| 60-69                  | 516 (20.2%)  | NA          | 531 (20.8%)  | NA          | 421 (20.9%)  | NA          | 301 (15%)    | NA          | 382 (19.1%)  | NA          |
| 70+                    | 363 (14.2%)  | NA          | 335 (13.1%)  | NA          | 309 (15.3%)  | NA          | 199 (9.9%)   | NA          | 279 (14%)    | NA          |
| Unknown age            | NA           | 22 (3.4%)   | NA           | 29 (4.6%)   | NA           | 24 (4.8%)   | NA           | 28 (5.6%)   | NA           | 19 (3.8%)   |
| <b>Gender</b>          |              |             |              |             |              |             |              |             |              |             |
| Female                 | NA           | 304 (47.6%) | 1371 (53.8%) | 317 (49.9%) | 1063 (52.8%) | 248 (49.4%) | 1053 (52.3%) | 245 (48.7%) | 1070 (53.5%) | 246 (49.1%) |
| Male                   | 1 (0%)       | 327 (51.3%) | 1171 (45.9%) | 314 (49.4%) | 941 (46.7%)  | 253 (50.4%) | 948 (47.1%)  | 254 (50.5%) | 921 (46.1%)  | 253 (50.5%) |
| Other                  | 2548 (100%)  | 7 (1.1%)    | 7 (0.3%)     | 4 (0.6%)    | 10 (0.5%)    | 1 (0.2%)    | 11 (0.5%)    | 4 (0.8%)    | 9 (0.4%)     | 2 (0.4%)    |
| <b>Day</b>             |              |             |              |             |              |             |              |             |              |             |
| Sunday                 | 764 (30%)    | 159 (24.9%) | 174 (6.8%)   | 79 (12.4%)  | NA           | NA          | 132 (6.6%)   | 31 (6.2%)   | 100 (5%)     | 32 (6.4%)   |
| Monday                 | 177 (6.9%)   | 34 (5.3%)   | 144 (5.6%)   | 41 (6.5%)   | NA           | NA          | 481 (23.9%)  | 91 (18.1%)  | 507 (25.4%)  | 115 (23%)   |
| Tuesday                | NA           | 28 (4.4%)   | 334 (13.1%)  | 43 (6.8%)   | NA           | NA          | 1 (0%)       | NA          | 212 (10.6%)  | 71 (14.2%)  |
| Wednesday              | NA           | NA          | 89 (3.5%)    | 37 (5.8%)   | 481 (23.9%)  | 154 (30.7%) | NA           | NA          | 5 (0.2%)     | NA          |
| Thursday               | 992 (38.9%)  | 217 (34%)   | 627 (24.6%)  | 134 (21.1%) | 1282 (63.7%) | 233 (46.4%) | 751 (37.3%)  | 197 (39.2%) | NA           | NA          |
| Friday                 | 108 (4.2%)   | 39 (6.1%)   | 814 (31.9%)  | 171 (26.9%) | 251 (12.5%)  | 109 (21.7%) | 452 (22.5%)  | 129 (25.6%) | 962 (48.1%)  | 211 (42.1%) |
| Saturday               | 508 (19.9%)  | 161 (25.2%) | 367 (14.4%)  | 130 (20.5%) | NA           | 6 (1.2%)    | 195 (9.7%)   | 55 (10.9%)  | 214 (10.7%)  | 72 (14.4%)  |
| <b>Data collection</b> |              |             |              |             |              |             |              |             |              |             |
| First day              | 24 Dec 20    | 24 Dec 20   | 30 Dec 20    | 30 Dec 20   | 06 Jan 21    | 06 Jan 21   | 14 Jan 21    | 14 Jan 21   | 22 Jan 21    | 22 Jan 21   |
| Last day               | 28 Dec 20    | 29 Dec 20   | 06 Jan 21    | 06 Jan 21   | 08 Jan 21    | 09 Jan 21   | 19 Jan 21    | 18 Jan 21   | 27 Jan 21    | 26 Jan 21   |
| <b>Household size</b>  |              |             |              |             |              |             |              |             |              |             |
| 1                      | 577 (22.6%)  | NA          | 604 (23.7%)  | NA          | 440 (21.8%)  | NA          | 445 (22.1%)  | NA          | 461 (23%)    | NA          |
| 2                      | 1163 (45.6%) | 38 (6%)     | 1131 (44.4%) | 45 (7.1%)   | 942 (46.8%)  | 35 (7%)     | 846 (42%)    | 42 (8.3%)   | 914 (45.7%)  | 39 (7.8%)   |
| 3-5                    | 777 (30.5%)  | 583 (91.4%) | 784 (30.8%)  | 567 (89.3%) | 599 (29.7%)  | 452 (90%)   | 701 (34.8%)  | 437 (86.9%) | 601 (30%)    | 451 (90%)   |
| 6+                     | 32 (1.3%)    | 17 (2.7%)   | 30 (1.2%)    | 23 (3.6%)   | 33 (1.6%)    | 15 (3%)     | 20 (1%)      | 24 (4.8%)   | 24 (1.2%)    | 11 (2.2%)   |
| <b>Panel</b>           | E            | E           | F            | F           | E            | E           | F            | F           | E            | E           |

Note: Wave A refers to CoMix surveys collecting behavioural data for adults whereas Wave C refers to CoMix surveys collecting behavioural data from adults responding on behalf of a randomly selected child.

Table S1 (continued) CoMix sample characteristics for the United Kingdom.

| Characteristic         | Wave A 45    | Wave C 45   | Wave A 46    | Wave C 46   | Wave A 47    | Wave C 47   | Wave A 48    | Wave C 48   | Wave A 49    | Wave C 49   |
|------------------------|--------------|-------------|--------------|-------------|--------------|-------------|--------------|-------------|--------------|-------------|
| All                    | 1994         | 499         | 1992         | 501         | 1997         | 500         | 1998         | 498         | 2000         | 499         |
| <b>Age</b>             |              |             |              |             |              |             |              |             |              |             |
| 0-4                    | NA           | 75 (15%)    | NA           | 77 (15.4%)  | NA           | 68 (13.6%)  | NA           | 77 (15.5%)  | NA           | 70 (14%)    |
| 5-11                   | NA           | 182 (36.5%) | NA           | 192 (38.3%) | NA           | 185 (37%)   | NA           | 191 (38.4%) | NA           | 178 (35.7%) |
| 12-17                  | NA           | 210 (42.1%) | NA           | 208 (41.5%) | NA           | 222 (44.4%) | NA           | 210 (42.2%) | NA           | 222 (44.5%) |
| 18-29                  | 384 (19.3%)  | NA          | 247 (12.4%)  | NA          | 364 (18.2%)  | NA          | 232 (11.6%)  | NA          | 313 (15.7%)  | NA          |
| 30-39                  | 372 (18.7%)  | NA          | 345 (17.3%)  | NA          | 375 (18.8%)  | NA          | 347 (17.4%)  | NA          | 361 (18%)    | NA          |
| 40-49                  | 331 (16.6%)  | NA          | 354 (17.8%)  | NA          | 328 (16.4%)  | NA          | 322 (16.1%)  | NA          | 333 (16.7%)  | NA          |
| 50-59                  | 322 (16.1%)  | NA          | 420 (21.1%)  | NA          | 417 (20.9%)  | NA          | 389 (19.5%)  | NA          | 367 (18.4%)  | NA          |
| 60-69                  | 369 (18.5%)  | NA          | 441 (22.1%)  | NA          | 351 (17.6%)  | NA          | 419 (21%)    | NA          | 384 (19.2%)  | NA          |
| 70+                    | 216 (10.8%)  | NA          | 185 (9.3%)   | NA          | 162 (8.1%)   | NA          | 289 (14.5%)  | NA          | 242 (12.1%)  | NA          |
| Unknown age            | NA           | 32 (6.4%)   | NA           | 24 (4.8%)   | NA           | 25 (5%)     | NA           | 20 (4%)     | NA           | 29 (5.8%)   |
| <b>Gender</b>          |              |             |              |             |              |             |              |             |              |             |
| Female                 | 1047 (52.5%) | 258 (51.7%) | 1112 (55.8%) | 249 (49.7%) | 1034 (51.8%) | 248 (49.6%) | 1094 (54.8%) | 232 (46.6%) | 1034 (51.7%) | 244 (48.9%) |
| Male                   | 939 (47.1%)  | 237 (47.5%) | 871 (43.7%)  | 250 (49.9%) | 954 (47.8%)  | 251 (50.2%) | 895 (44.8%)  | 262 (52.6%) | 954 (47.7%)  | 252 (50.5%) |
| Other                  | 8 (0.4%)     | 4 (0.8%)    | 9 (0.5%)     | 2 (0.4%)    | 9 (0.5%)     | 1 (0.2%)    | 9 (0.5%)     | 4 (0.8%)    | 12 (0.6%)    | 3 (0.6%)    |
| <b>Day</b>             |              |             |              |             |              |             |              |             |              |             |
| Sunday                 | 8 (0.4%)     | 15 (3%)     | 135 (6.8%)   | 37 (7.4%)   | 118 (5.9%)   | 31 (6.2%)   | 105 (5.3%)   | 37 (7.4%)   | 92 (4.6%)    | 31 (6.2%)   |
| Monday                 | NA           | 10 (2%)     | 260 (13.1%)  | 77 (15.4%)  | 214 (10.7%)  | 51 (10.2%)  | 135 (6.8%)   | 35 (7%)     | 519 (26%)    | 86 (17.2%)  |
| Tuesday                | NA           | NA          | 107 (5.4%)   | 39 (7.8%)   | 141 (7.1%)   | 14 (2.8%)   | 302 (15.1%)  | 59 (11.8%)  | 116 (5.8%)   | 47 (9.4%)   |
| Wednesday              | NA           | NA          | 254 (12.8%)  | 42 (8.4%)   | 1 (0.1%)     | NA          | 125 (6.3%)   | 23 (4.6%)   | 2 (0.1%)     | 17 (3.4%)   |
| Thursday               | 1059 (53.1%) | 294 (58.9%) | 382 (19.2%)  | 112 (22.4%) | 720 (36.1%)  | 178 (35.6%) | 852 (42.6%)  | 203 (40.8%) | 747 (37.4%)  | 201 (40.3%) |
| Friday                 | 562 (28.2%)  | 118 (23.6%) | 426 (21.4%)  | 100 (20%)   | 516 (25.8%)  | 126 (25.2%) | 308 (15.4%)  | 79 (15.9%)  | 399 (20%)    | 94 (18.8%)  |
| Saturday               | 365 (18.3%)  | 62 (12.4%)  | 428 (21.5%)  | 94 (18.8%)  | 287 (14.4%)  | 100 (20%)   | 171 (8.6%)   | 62 (12.4%)  | 125 (6.2%)   | 23 (4.6%)   |
| <b>Data collection</b> |              |             |              |             |              |             |              |             |              |             |
| First day              | 28 Jan 21    | 28 Jan 21   | 04 Feb 21    | 04 Feb 21   | 11 Feb 21    | 11 Feb 21   | 18 Feb 21    | 18 Feb 21   | 25 Feb 21    | 25 Feb 21   |
| Last day               | 31 Jan 21    | 01 Feb 21   | 10 Feb 21    | 10 Feb 21   | 17 Feb 21    | 16 Feb 21   | 25 Feb 21    | 24 Feb 21   | 03 Mar 21    | 03 Mar 21   |
| <b>Household size</b>  |              |             |              |             |              |             |              |             |              |             |
| 1                      | 468 (23.5%)  | NA          | 451 (22.6%)  | NA          | 484 (24.2%)  | NA          | 453 (22.7%)  | 1 (0.2%)    | 507 (25.4%)  | NA          |
| 2                      | 851 (42.7%)  | 38 (7.6%)   | 883 (44.3%)  | 45 (9%)     | 842 (42.2%)  | 39 (7.8%)   | 893 (44.7%)  | 38 (7.6%)   | 851 (42.5%)  | 36 (7.2%)   |
| 3-5                    | 656 (32.9%)  | 432 (86.6%) | 619 (31.1%)  | 438 (87.4%) | 648 (32.4%)  | 432 (86.4%) | 621 (31.1%)  | 440 (88.4%) | 624 (31.2%)  | 437 (87.6%) |
| 6+                     | 19 (1%)      | 29 (5.8%)   | 39 (2%)      | 18 (3.6%)   | 23 (1.2%)    | 29 (5.8%)   | 31 (1.6%)    | 19 (3.8%)   | 18 (0.9%)    | 26 (5.2%)   |
| <b>Panel</b>           | F            | F           | E            | E           | F            | F           | E            | E           | F            | F           |

Note: Wave A refers to CoMix surveys collecting behavioural data for adults whereas Wave C refers to CoMix surveys collecting behavioural data from adults responding on behalf of a randomly selected child.

Table S1 (continued) CoMix sample characteristics for the United Kingdom.

| Characteristic         | Wave A 50    | Wave C 50   | Wave A 51    | Wave C 51   | Wave A 52   | Wave C 52   | Wave A 53    | Wave C 53   |
|------------------------|--------------|-------------|--------------|-------------|-------------|-------------|--------------|-------------|
| <b>All</b>             | 1996         | 500         | 1999         | 502         | 1997        | 502         | 1994         | 489         |
| <b>Age</b>             |              |             |              |             |             |             |              |             |
| 0-4                    | NA           | 87 (17.4%)  | NA           | 74 (14.7%)  | NA          | 73 (14.5%)  | NA           | 84 (17.2%)  |
| 5-11                   | NA           | 193 (38.6%) | NA           | 188 (37.5%) | NA          | 196 (39%)   | NA           | 168 (34.4%) |
| 12-17                  | NA           | 204 (40.8%) | NA           | 214 (42.6%) | NA          | 211 (42%)   | NA           | 209 (42.7%) |
| 18-29                  | 203 (10.2%)  | NA          | 289 (14.5%)  | NA          | 201 (10.1%) | NA          | 314 (15.7%)  | NA          |
| 30-39                  | 303 (15.2%)  | NA          | 372 (18.6%)  | NA          | 306 (15.3%) | NA          | 358 (18%)    | NA          |
| 40-49                  | 322 (16.1%)  | NA          | 302 (15.1%)  | NA          | 320 (16%)   | NA          | 301 (15.1%)  | NA          |
| 50-59                  | 397 (19.9%)  | NA          | 377 (18.9%)  | NA          | 428 (21.4%) | NA          | 388 (19.5%)  | NA          |
| 60-69                  | 454 (22.7%)  | NA          | 396 (19.8%)  | NA          | 448 (22.4%) | NA          | 385 (19.3%)  | NA          |
| 70+                    | 317 (15.9%)  | NA          | 263 (13.2%)  | NA          | 294 (14.7%) | NA          | 248 (12.4%)  | NA          |
| Unknown age            | NA           | 16 (3.2%)   | NA           | 26 (5.2%)   | NA          | 22 (4.4%)   | NA           | 28 (5.7%)   |
| <b>Gender</b>          |              |             |              |             |             |             |              |             |
| Female                 | 1091 (54.7%) | 244 (48.8%) | 1024 (51.2%) | 244 (48.6%) | 1038 (52%)  | 248 (49.4%) | 1020 (51.2%) | 248 (50.7%) |
| Male                   | 897 (44.9%)  | 253 (50.6%) | 964 (48.2%)  | 256 (51%)   | 953 (47.7%) | 252 (50.2%) | 960 (48.1%)  | 239 (48.9%) |
| Other                  | 8 (0.4%)     | 3 (0.6%)    | 11 (0.6%)    | 2 (0.4%)    | 6 (0.3%)    | 2 (0.4%)    | 14 (0.7%)    | 2 (0.4%)    |
| <b>Day</b>             |              |             |              |             |             |             |              |             |
| Sunday                 | 107 (5.4%)   | 33 (6.6%)   | 122 (6.1%)   | 55 (11%)    | 77 (3.9%)   | 25 (5%)     | 187 (9.4%)   | 48 (9.8%)   |
| Monday                 | 284 (14.2%)  | 41 (8.2%)   | 101 (5.1%)   | 47 (9.4%)   | 260 (13%)   | 49 (9.8%)   | 241 (12.1%)  | 58 (11.9%)  |
| Tuesday                | 135 (6.8%)   | 23 (4.6%)   | 298 (14.9%)  | 47 (9.4%)   | 346 (17.3%) | 53 (10.6%)  | 683 (34.3%)  | 189 (38.7%) |
| Wednesday              | 65 (3.3%)    | 52 (10.4%)  | 24 (1.2%)    | 156 (31.1%) | 144 (7.2%)  | 120 (23.9%) | NA           | NA          |
| Thursday               | 798 (40%)    | 206 (41.2%) | NA           | NA          | 580 (29%)   | 127 (25.3%) | 50 (2.5%)    | 36 (7.4%)   |
| Friday                 | 414 (20.7%)  | 86 (17.2%)  | 1152 (57.6%) | 103 (20.5%) | 404 (20.2%) | 87 (17.3%)  | 534 (26.8%)  | 111 (22.7%) |
| Saturday               | 193 (9.7%)   | 59 (11.8%)  | 302 (15.1%)  | 94 (18.7%)  | 186 (9.3%)  | 41 (8.2%)   | 299 (15%)    | 47 (9.6%)   |
| <b>Data collection</b> |              |             |              |             |             |             |              |             |
| First day              | 04 Mar 21    | 04 Mar 21   | 12 Mar 21    | 12 Mar 21   | 18 Mar 21   | 18 Mar 21   | 25 Mar 21    | 25 Mar 21   |
| Last day               | 11 Mar 21    | 11 Mar 21   | 17 Mar 21    | 17 Mar 21   | 24 Mar 21   | 24 Mar 21   | 30 Mar 21    | 30 Mar 21   |
| <b>Household size</b>  |              |             |              |             |             |             |              |             |
| 1                      | 456 (22.8%)  | NA          | 499 (25%)    | NA          | 442 (22.1%) | NA          | 469 (23.5%)  | NA          |
| 2                      | 913 (45.7%)  | 42 (8.4%)   | 889 (44.5%)  | 42 (8.4%)   | 918 (46%)   | 36 (7.2%)   | 879 (44.1%)  | 33 (6.7%)   |
| 3-5                    | 613 (30.7%)  | 442 (88.4%) | 588 (29.4%)  | 429 (85.5%) | 610 (30.5%) | 448 (89.2%) | 623 (31.2%)  | 437 (89.4%) |
| 6+                     | 14 (0.7%)    | 16 (3.2%)   | 23 (1.2%)    | 31 (6.2%)   | 27 (1.4%)   | 18 (3.6%)   | 23 (1.2%)    | 19 (3.9%)   |
| <b>Panel</b>           | E            | E           | F            | F           | E           | E           | F            | F           |

Note: Wave A refers to CoMix surveys collecting behavioural data for adults whereas Wave C refers to CoMix surveys collecting behavioural data from adults responding on behalf of a randomly selected child.

## 1.2 Belgium

**Table S2. CoMix sample characteristics for Belgium, Waves 9 to 25**

| Characteristic         | Wave 9      | Wave 10     | Wave 11     | Wave 12     | Wave 13     | Wave 14     | Wave 15     | Wave 16     | Wave 17     | Wave 18     |
|------------------------|-------------|-------------|-------------|-------------|-------------|-------------|-------------|-------------|-------------|-------------|
| <b>All</b>             | 1500        | 1340        | 1209        | 1087        | 983         | 883         | 799         | 719         | 645         | 1497        |
| <b>Age</b>             |             |             |             |             |             |             |             |             |             |             |
| 0-4                    | 48 (3.3%)   | 41 (3.1%)   | 35 (2.9%)   | 34 (3.1%)   | 33 (3.4%)   | 35 (4.0%)   | 28 (3.5%)   | 22 (3.1%)   | 18 (2.8%)   | 51 (3.4%)   |
| 5-11                   | 115 (7.7%)  | 91 (6.8%)   | 88 (7.3%)   | 79 (7.3%)   | 72 (7.3%)   | 67 (7.6%)   | 51 (6.4%)   | 50 (7.0%)   | 54 (8.4%)   | 108 (7.2%)  |
| 12-15                  | 87 (5.8%)   | 77 (5.7%)   | 73 (6.0%)   | 70 (6.4%)   | 55 (5.6%)   | 45 (5.1%)   | 49 (6.1%)   | 44 (6.1%)   | 31 (4.8%)   | 83 (5.5%)   |
| 16-17                  | 50 (3.3%)   | 50 (3.7%)   | 40 (3.3%)   | 34 (3.1%)   | 34 (3.5%)   | 26 (2.9%)   | 28 (3.5%)   | 25 (3.5%)   | 19 (2.9%)   | 50 (3.3%)   |
| 18-29                  | 228 (15.2%) | 180 (13.4%) | 137 (11.3%) | 126 (11.6%) | 137 (13.9%) | 137 (15.5%) | 100 (12.5%) | 84 (11.7%)  | 83 (12.9%)  | 221 (14.8%) |
| 30-39                  | 174 (11.6%) | 125 (9.3%)  | 125 (10.3%) | 116 (10.7%) | 113 (11.5%) | 121 (13.7%) | 81 (10.1%)  | 73 (10.2%)  | 76 (11.8%)  | 188 (12.6%) |
| 40-49                  | 195 (13.0%) | 156 (11.6%) | 173 (14.3%) | 155 (14.3%) | 136 (13.8%) | 156 (17.7%) | 114 (14.3%) | 100 (13.9%) | 87 (13.5%)  | 191 (12.8%) |
| 50-59                  | 191 (12.7%) | 215 (16.0%) | 176 (14.6%) | 160 (14.7%) | 137 (13.9%) | 118 (13.4%) | 121 (15.1%) | 138 (19.2%) | 89 (13.8%)  | 201 (13.4%) |
| 60-69                  | 285 (19.0%) | 276 (20.6%) | 249 (20.6%) | 220 (20.2%) | 184 (18.7%) | 133 (15.1%) | 145 (18.1%) | 135 (18.8%) | 156 (24.2%) | 267 (17.8%) |
| 70-120                 | 127 (8.5%)  | 125 (9.3%)  | 107 (8.9%)  | 90 (8.3%)   | 79 (8.0%)   | 40 (4.5%)   | 78 (9.8%)   | 45 (6.3%)   | 24 (3.7%)   | 130 (8.7%)  |
| NA/Other               | NA          | 4 (0.3%)    | 6 (0.5%)    | 3 (0.3%)    | 3 (0.3%)    | 5 (0.6%)    | 4 (0.5%)    | 3 (0.4%)    | 8 (1.2%)    | 7 (0.5%)    |
| <b>Gender</b>          |             |             |             |             |             |             |             |             |             |             |
| Female                 | 740 (49.3%) | 663 (49.5%) | 582 (48.1%) | 520 (47.8%) | 487 (49.5%) | 449 (50.8%) | 399 (49.9%) | 346 (48.1%) | 317 (49.1%) | 729 (48.7%) |
| Male                   | 759 (50.6%) | 675 (50.4%) | 627 (51.9%) | 566 (52.1%) | 496 (50.5%) | 433 (49.0%) | 400 (50.1%) | 372 (51.7%) | 328 (50.9%) | 766 (51.2%) |
| Other or Missing       | 1 (0.1%)    | 2 (0.1%)    | NA          | 1 (0.1%)    | NA          | 1 (0.1%)    | NA          | 1 (0.1%)    | NA          | 2 (0.1%)    |
| 0                      | NA          | NA          | NA          | NA          | NA          | NA          | NA          | NA          | NA          | NA          |
| <b>Day</b>             |             |             |             |             |             |             |             |             |             |             |
| Sunday                 | 33 (2.2%)   | 315 (23.5%) | 118 (9.8%)  | 28 (2.6%)   | 48 (4.9%)   | 1 (0.1%)    | 7 (0.9%)    | 129 (17.9%) | NA          | 56 (3.7%)   |
| Monday                 | 64 (4.3%)   | 71 (5.3%)   | 67 (5.5%)   | 93 (8.6%)   | 22 (2.2%)   | NA          | NA          | 175 (24.3%) | NA          | 41 (2.7%)   |
| Tuesday                | 101 (6.7%)  | 55 (4.1%)   | 138 (11.4%) | 107 (9.8%)  | 160 (16.3%) | 386 (43.7%) | 30 (3.8%)   | 39 (5.4%)   | 458 (71.0%) | 639 (42.7%) |
| Wednesday              | 513 (34.2%) | 29 (2.2%)   | 62 (5.1%)   | 675 (62.1%) | 687 (69.9%) | 256 (29.0%) | 8 (1.0%)    | 62 (8.6%)   | 149 (23.1%) | 254 (17.0%) |
| Thursday               | 666 (44.4%) | 640 (47.8%) | 747 (61.8%) | 82 (7.5%)   | 34 (3.5%)   | 213 (24.1%) | 298 (37.3%) | 143 (19.9%) | 38 (5.9%)   | 191 (12.8%) |
| Friday                 | 100 (6.7%)  | 111 (8.3%)  | 59 (4.9%)   | 82 (7.5%)   | 21 (2.1%)   | 27 (3.1%)   | 380 (47.6%) | 78 (10.8%)  | NA          | 179 (12.0%) |
| Saturday               | 23 (1.5%)   | 119 (8.9%)  | 18 (1.5%)   | 20 (1.8%)   | 11 (1.1%)   | NA          | 76 (9.5%)   | 93 (12.9%)  | NA          | 137 (9.2%)  |
| <b>Data collection</b> |             |             |             |             |             |             |             |             |             |             |
| First day              | 12 Nov 20   | 27 Nov 20   | 10 Dec 20   | 23 Dec 20   | 06 Jan 21   | 20 Jan 21   | 03 Feb 21   | 17 Feb 21   | 03 Mar 21   | 17 Mar 21   |
| Last day               | 19 Nov 20   | 09 Dec 20   | 17 Dec 20   | 05 Jan 21   | 12 Jan 21   | 25 Jan 21   | 08 Feb 21   | 24 Feb 21   | 05 Mar 21   | 25 Mar 21   |
| <b>Household size</b>  |             |             |             |             |             |             |             |             |             |             |
| 1                      | 329 (21.9%) | 285 (21.3%) | 277 (22.9%) | 251 (23.1%) | 235 (23.9%) | 201 (22.8%) | 198 (24.8%) | 167 (23.2%) | 161 (25.0%) | 342 (22.8%) |
| 2                      | 535 (35.7%) | 523 (39.0%) | 454 (37.6%) | 419 (38.5%) | 359 (36.5%) | 299 (33.9%) | 306 (38.3%) | 273 (38.0%) | 228 (35.3%) | 559 (37.3%) |
| 3                      | 284 (18.9%) | 243 (18.1%) | 226 (18.7%) | 195 (17.9%) | 179 (18.2%) | 166 (18.8%) | 135 (16.9%) | 127 (17.7%) | 128 (19.8%) | 288 (19.2%) |
| 4                      | 254 (16.9%) | 201 (15.0%) | 184 (15.2%) | 160 (14.7%) | 143 (14.5%) | 150 (17.0%) | 119 (14.9%) | 109 (15.2%) | 88 (13.6%)  | 210 (14.0%) |
| 5+                     | 98 (6.5%)   | 88 (6.6%)   | 68 (5.6%)   | 62 (5.7%)   | 67 (6.8%)   | 67 (7.6%)   | 41 (5.1%)   | 43 (6.0%)   | 40 (6.2%)   | 98 (6.5%)   |

**Table S2 (continued) CoMix sample characteristics for Belgium, Waves 9 to 25**

| Characteristic         | Wave 19     | Wave 20     | Wave 21     | Wave 22     | Wave 23     | Wave 24     | Wave 25     |
|------------------------|-------------|-------------|-------------|-------------|-------------|-------------|-------------|
| <b>All</b>             | 1383        | 1213        | 1213        | 1498        | 1201        | 1336        | 1185        |
| <b>Age</b>             |             |             |             |             |             |             |             |
| 0-4                    | 41 (3.0%)   | 45 (3.7%)   | 36 (3.0%)   | 49 (3.3%)   | 27 (2.2%)   | 33 (2.5%)   | 30 (2.5%)   |
| 5-11                   | 106 (7.7%)  | 82 (6.8%)   | 96 (7.9%)   | 110 (7.3%)  | 93 (7.7%)   | 106 (7.9%)  | 90 (7.6%)   |
| 12-15                  | 81 (5.9%)   | 70 (5.8%)   | 71 (5.9%)   | 83 (5.5%)   | 78 (6.5%)   | 82 (6.1%)   | 72 (6.1%)   |
| 16-17                  | 46 (3.3%)   | 39 (3.2%)   | 33 (2.7%)   | 48 (3.2%)   | 35 (2.9%)   | 41 (3.1%)   | 39 (3.3%)   |
| 18-29                  | 187 (13.5%) | 165 (13.6%) | 158 (13.0%) | 208 (13.9%) | 125 (10.4%) | 140 (10.5%) | 123 (10.4%) |
| 30-39                  | 150 (10.8%) | 150 (12.4%) | 146 (12.0%) | 169 (11.3%) | 127 (10.6%) | 126 (9.4%)  | 128 (10.8%) |
| 40-49                  | 175 (12.7%) | 159 (13.1%) | 164 (13.5%) | 198 (13.2%) | 158 (13.2%) | 181 (13.5%) | 171 (14.4%) |
| 50-59                  | 201 (14.5%) | 183 (15.1%) | 180 (14.8%) | 230 (15.4%) | 176 (14.7%) | 203 (15.2%) | 172 (14.5%) |
| 60-69                  | 258 (18.7%) | 219 (18.1%) | 211 (17.4%) | 258 (17.2%) | 249 (20.7%) | 268 (20.1%) | 234 (19.7%) |
| 70-120                 | 133 (9.6%)  | 95 (7.8%)   | 111 (9.2%)  | 136 (9.1%)  | 125 (10.4%) | 151 (11.3%) | 119 (10.0%) |
| NA/Other               | 5 (0.4%)    | 6 (0.5%)    | 7 (0.6%)    | 9 (0.6%)    | 8 (0.7%)    | 5 (0.4%)    | 7 (0.6%)    |
| <b>Gender</b>          |             |             |             |             |             |             |             |
| Female                 | 676 (48.9%) | 592 (48.8%) | 584 (48.1%) | 728 (48.6%) | 562 (46.8%) | 664 (49.7%) | 570 (48.1%) |
| Male                   | 705 (51.0%) | 619 (51.0%) | 627 (51.7%) | 767 (51.2%) | 637 (53.0%) | 672 (50.3%) | 614 (51.8%) |
| Other or Missing       | 1 (0.1%)    | 2 (0.2%)    | 2 (0.2%)    | 2 (0.1%)    | 1 (0.1%)    | NA          | 1 (0.1%)    |
| 0                      | 1 (0.1%)    | NA          | NA          | 1 (0.1%)    | 1 (0.1%)    | NA          | NA          |
| <b>Day</b>             |             |             |             |             |             |             |             |
| Sunday                 | 216 (15.6%) | 268 (22.1%) | 19 (1.6%)   | 301 (20.1%) | 370 (30.8%) | 342 (25.6%) | 30 (2.5%)   |
| Monday                 | 243 (17.6%) | 225 (18.5%) | 143 (11.8%) | 147 (9.8%)  | 30 (2.5%)   | 40 (3.0%)   | NA          |
| Tuesday                | 190 (13.7%) | 291 (24.0%) | 647 (53.3%) | NA          | 40 (3.3%)   | 30 (2.2%)   | 353 (29.8%) |
| Wednesday              | 130 (9.4%)  | 8 (0.7%)    | 173 (14.3%) | 215 (14.4%) | 270 (22.5%) | 222 (16.6%) | 116 (9.8%)  |
| Thursday               | 282 (20.4%) | 191 (15.7%) | 154 (12.7%) | 360 (24.0%) | 171 (14.2%) | 396 (29.6%) | 633 (53.4%) |
| Friday                 | 251 (18.1%) | 163 (13.4%) | 44 (3.6%)   | 250 (16.7%) | 187 (15.6%) | 234 (17.5%) | 53 (4.5%)   |
| Saturday               | 71 (5.1%)   | 67 (5.5%)   | 33 (2.7%)   | 225 (15.0%) | 133 (11.1%) | 72 (5.4%)   | NA          |
| <b>Data collection</b> |             |             |             |             |             |             |             |
| First day              | 31 Mar 21   | 14 Apr 21   | 28 Apr 21   | 13 May 21   | 26 May 21   | 10 Jun 21   | 23 Jun 21   |
| Last day               | 07 Apr 21   | 20 Apr 21   | 04 May 21   | 24 May 21   | 02 Jun 21   | 17 Jun 21   | 28 Jun 21   |
| <b>Household size</b>  |             |             |             |             |             |             |             |
| 1                      | 331 (23.9%) | 289 (23.8%) | 293 (24.2%) | 341 (22.8%) | 296 (24.6%) | 313 (23.4%) | 302 (25.5%) |
| 2                      | 531 (38.4%) | 455 (37.5%) | 449 (37.0%) | 564 (37.7%) | 460 (38.3%) | 511 (38.2%) | 441 (37.2%) |
| 3                      | 234 (16.9%) | 224 (18.5%) | 217 (17.9%) | 277 (18.5%) | 204 (17.0%) | 233 (17.4%) | 210 (17.7%) |
| 4                      | 201 (14.5%) | 167 (13.8%) | 179 (14.8%) | 221 (14.8%) | 170 (14.2%) | 198 (14.8%) | 172 (14.5%) |
| 5+                     | 86 (6.2%)   | 78 (6.4%)   | 75 (6.2%)   | 95 (6.3%)   | 71 (5.9%)   | 81 (6.1%)   | 60 (5.1%)   |

### 1.3 The Netherlands

**Table S3. CoMix sample characteristics for the Netherlands**

| Characteristic         | Wave A 1    | Wave A 2    | Wave A 3    | Wave A 4    | Wave A 5    | Wave A 6    | Wave A 7    | Wave A 8    | Wave A 9    | Wave C 9    |
|------------------------|-------------|-------------|-------------|-------------|-------------|-------------|-------------|-------------|-------------|-------------|
| <b>All</b>             | 1560        | 1346        | 1175        | 1052        | 1157        | 1144        | 985         | 995         | 1185        | 298         |
| <b>Age</b>             |             |             |             |             |             |             |             |             |             |             |
| 0-4                    | NA          | NA          | NA          | NA          | NA          | NA          | NA          | NA          | NA          | 49 (16.4%)  |
| 5-11                   | NA          | NA          | NA          | NA          | NA          | NA          | NA          | NA          | NA          | 99 (33.2%)  |
| 12-15                  | NA          | NA          | NA          | NA          | NA          | NA          | NA          | NA          | NA          | 99 (33.2%)  |
| 16-17                  | NA          | NA          | NA          | NA          | NA          | NA          | NA          | NA          | NA          | 51 (17.1%)  |
| 18-29                  | 194 (12.4%) | 124 (9.2%)  | 97 (8.3%)   | 93 (8.8%)   | 91 (7.9%)   | 80 (7.0%)   | 67 (6.8%)   | 62 (6.2%)   | 341 (28.8%) | NA          |
| 30-39                  | 229 (14.7%) | 185 (13.7%) | 149 (12.7%) | 133 (12.6%) | 142 (12.3%) | 150 (13.1%) | 117 (11.0%) | 119 (12.0%) | 181 (15.3%) | NA          |
| 40-49                  | 267 (17.1%) | 246 (18.3%) | 207 (17.6%) | 197 (18.7%) | 213 (18.4%) | 209 (18.3%) | 174 (17.7%) | 184 (18.5%) | 160 (13.5%) | NA          |
| 50-59                  | 269 (17.2%) | 253 (18.8%) | 230 (19.6%) | 200 (19.0%) | 231 (20.0%) | 213 (18.6%) | 197 (20.0%) | 189 (19.0%) | 185 (15.6%) | NA          |
| 60-69                  | 408 (26.2%) | 359 (26.7%) | 335 (28.5%) | 302 (28.7%) | 329 (28.4%) | 333 (29.1%) | 291 (29.5%) | 301 (30.3%) | 219 (18.5%) | NA          |
| 70-120                 | 193 (12.4%) | 179 (13.3%) | 157 (13.4%) | 127 (12.1%) | 151 (13.1%) | 159 (13.9%) | 139 (14.1%) | 140 (14.1%) | 99 (8.4%)   | NA          |
| <b>Gender</b>          |             |             |             |             |             |             |             |             |             |             |
| Female                 | 762 (48.9%) | 651 (48.4%) | 568 (48.3%) | 510 (48.5%) | 567 (49.0%) | 554 (48.4%) | 490 (49.8%) | 489 (49.2%) | 603 (50.9%) | 138 (46.3%) |
| Male                   | 798 (51.2%) | 695 (51.6%) | 607 (51.7%) | 542 (51.5%) | 590 (51.0%) | 590 (51.6%) | 495 (50.3%) | 506 (50.9%) | 582 (49.1%) | 160 (53.7%) |
| <b>Day</b>             |             |             |             |             |             |             |             |             |             |             |
| Sunday                 | 640 (41.0%) | 711 (52.8%) | 467 (39.7%) | 39 (3.7%)   | 113 (9.8%)  | 107 (9.4%)  | 263 (26.7%) | 74 (7.4%)   | 13 (1.1%)   | 2 (0.7%)    |
| Monday                 | 299 (19.2%) | 169 (12.6%) | 142 (12.1%) | 17 (1.6%)   | 65 (5.6%)   | 64 (5.6%)   | 57 (5.8%)   | 86 (8.6%)   | 36 (3.0%)   | 55 (18.5%)  |
| Tuesday                | 125 (8.0%)  | 91 (6.8%)   | 69 (5.9%)   | 13 (1.2%)   | 35 (3.0%)   | 23 (2.0%)   | 108 (11.0%) | 56 (5.6%)   | 15 (1.3%)   | NA          |
| Wednesday              | 20 (1.3%)   | 18 (1.3%)   | 15 (1.3%)   | 233 (22.2%) | 240 (20.7%) | 250 (21.9%) | 163 (16.6%) | 226 (22.7%) | 213 (18.0%) | 47 (15.8%)  |
| Thursday               | 310 (19.9%) | 242 (18.0%) | 337 (28.7%) | 605 (57.5%) | 594 (51.3%) | 555 (48.5%) | 20 (2.0%)   | 185 (18.6%) | 831 (70.1%) | 182 (61.1%) |
| Friday                 | 119 (7.6%)  | 78 (5.8%)   | 103 (8.8%)  | 105 (10.0%) | 75 (6.5%)   | 104 (9.1%)  | 150 (15.2%) | 167 (16.8%) | 64 (5.4%)   | 5 (1.7%)    |
| Saturday               | 47 (3.0%)   | 37 (2.8%)   | 42 (3.6%)   | 40 (3.8%)   | 35 (3.0%)   | 41 (3.6%)   | 224 (22.7%) | 201 (20.2%) | 13 (1.1%)   | 7 (2.4%)    |
| <b>Data collection</b> |             |             |             |             |             |             |             |             |             |             |
| First day              | 16 Apr 20   | 07 May 20   | 21 May 20   | 03 Jun 20   | 17 Jun 20   | 01 Jul 20   | 15 Jul 20   | 29 Jul 20   | 23 Dec 20   | 23 Dec 20   |
| Last day               | 26 Apr 20   | 14 May 20   | 28 May 20   | 10 Jun 20   | 24 Jun 20   | 08 Jul 20   | 22 Jul 20   | 05 Aug 20   | 03 Jan 21   | 28 Dec 20   |
| <b>Household size</b>  |             |             |             |             |             |             |             |             |             |             |
| 1                      | 320 (20.5%) | 330 (24.5%) | 305 (26.0%) | 282 (26.8%) | 317 (27.4%) | 316 (27.6%) | 303 (30.8%) | 315 (31.7%) | 401 (33.8%) | NA          |
| 2                      | 583 (37.4%) | 507 (37.7%) | 474 (40.3%) | 435 (41.4%) | 476 (41.1%) | 504 (44.1%) | 443 (45.0%) | 437 (43.9%) | 446 (37.6%) | 20 (6.7%)   |
| 3-5                    | 644 (41.3%) | 498 (37.0%) | 388 (33.0%) | 330 (31.4%) | 358 (30.9%) | 321 (28.0%) | 236 (24.0%) | 241 (24.2%) | 326 (27.5%) | 277 (93.0%) |
| 6+                     | 13 (0.8%)   | 11 (0.8%)   | 8 (0.7%)    | 5 (0.5%)    | 6 (0.5%)    | 3 (0.3%)    | 3 (0.3%)    | 2 (0.2%)    | 12 (1.0%)   | 1 (0.3%)    |

Note: Wave A refers to CoMix surveys collecting behavioural data for adults whereas Wave C refers to CoMix surveys collecting behavioural data from adults responding on behalf of a randomly selected child.



**Table S3 (continued) CoMix sample characteristics for the Netherlands**

| Characteristic         | Wave A 10   | Wave C 10   | Wave A 11   | Wave C 11   | Wave A 12   | Wave C 12   | Wave A 13   | Wave C 13   | Wave A 14   | Wave C 14   |
|------------------------|-------------|-------------|-------------|-------------|-------------|-------------|-------------|-------------|-------------|-------------|
| <b>All</b>             | 1076        | 259         | 968         | 236         | 873         | 212         | 783         | 187         | 703         | 171         |
| <b>Age</b>             |             |             |             |             |             |             |             |             |             |             |
| 0-4                    | NA          | 40 (15.4%)  | NA          | 40 (17.0%)  | NA          | 35 (16.5%)  | NA          | 29 (15.5%)  | NA          | 28 (16.4%)  |
| 5-11                   | NA          | 92 (35.5%)  | NA          | 74 (31.4%)  | NA          | 71 (33.5%)  | NA          | 58 (31.0%)  | NA          | 65 (38.0%)  |
| 12-15                  | NA          | 84 (32.4%)  | NA          | 83 (35.2%)  | NA          | 70 (33.0%)  | NA          | 66 (35.3%)  | NA          | 53 (31.0%)  |
| 16-17                  | NA          | 43 (16.6%)  | NA          | 39 (16.5%)  | NA          | 36 (17.0%)  | NA          | 34 (18.2%)  | NA          | 25 (14.6%)  |
| 18-29                  | 225 (20.9%) | NA          | 251 (25.9%) | NA          | 180 (20.6%) | NA          | 147 (18.8%) | NA          | 178 (25.3%) | NA          |
| 30-39                  | 153 (14.2%) | NA          | 168 (17.4%) | NA          | 135 (15.5%) | NA          | 109 (13.9%) | NA          | 145 (20.6%) | NA          |
| 40-49                  | 146 (13.5%) | NA          | 126 (13.0%) | NA          | 111 (12.7%) | NA          | 112 (14.3%) | NA          | 117 (16.6%) | NA          |
| 50-59                  | 195 (18.1%) | NA          | 162 (16.7%) | NA          | 154 (17.6%) | NA          | 141 (18.0%) | NA          | 125 (17.8%) | NA          |
| 60-69                  | 235 (21.8%) | NA          | 165 (17.1%) | NA          | 193 (22.1%) | NA          | 185 (23.6%) | NA          | 107 (15.2%) | NA          |
| 70-120                 | 122 (11.3%) | NA          | 96 (9.9%)   | NA          | 100 (11.5%) | NA          | 89 (11.4%)  | NA          | 31 (4.4%)   | NA          |
| <b>Gender</b>          |             |             |             |             |             |             |             |             |             |             |
| Female                 | 528 (49.1%) | 124 (47.9%) | 486 (50.2%) | 119 (50.4%) | 421 (48.2%) | 104 (49.1%) | 371 (47.4%) | 88 (47.1%)  | 353 (50.2%) | 79 (46.2%)  |
| Male                   | 548 (50.9%) | 135 (52.1%) | 482 (49.8%) | 117 (49.6%) | 452 (51.8%) | 108 (50.9%) | 412 (52.6%) | 99 (52.9%)  | 350 (49.8%) | 92 (53.8%)  |
| <b>Day</b>             |             |             |             |             |             |             |             |             |             |             |
| Sunday                 | 370 (34.4%) | 133 (51.4%) | 689 (71.2%) | 169 (71.6%) | 611 (70.0%) | 107 (50.5%) | 133 (17.0%) | 3 (1.6%)    | 112 (15.9%) | NA          |
| Monday                 | 87 (8.1%)   | 40 (15.4%)  | 123 (12.7%) | 15 (6.4%)   | 108 (12.4%) | 60 (28.3%)  | 408 (52.1%) | 111 (59.4%) | 7 (1.0%)    | 1 (0.6%)    |
| Tuesday                | 221 (20.5%) | 86 (33.2%)  | 15 (1.6%)   | 4 (1.7%)    | NA          | 15 (7.1%)   | 71 (9.1%)   | 16 (8.6%)   | NA          | 3 (1.8%)    |
| Wednesday              | NA          | NA          | 133 (13.7%) | 48 (20.3%)  | 154 (17.6%) | 30 (14.2%)  | 15 (1.9%)   | 4 (2.1%)    | NA          | 1 (0.6%)    |
| Thursday               | 222 (20.6%) | NA          | 8 (0.8%)    | NA          | NA          | NA          | 62 (7.9%)   | 43 (23.0%)  | 445 (63.3%) | 147 (86.0%) |
| Friday                 | 138 (12.8%) | NA          | NA          | NA          | NA          | NA          | 81 (10.3%)  | 8 (4.3%)    | 92 (13.1%)  | 19 (11.1%)  |
| Saturday               | 38 (3.5%)   | NA          | NA          | NA          | NA          | NA          | 13 (1.7%)   | 2 (1.1%)    | 47 (6.7%)   | NA          |
| <b>Data collection</b> |             |             |             |             |             |             |             |             |             |             |
| First day              | 07 Jan 21   | 10 Jan 21   | 24 Jan 21   | 24 Jan 21   | 03 Feb 21   | 03 Feb 21   | 17 Feb 21   | 17 Feb 21   | 04 Mar 21   | 04 Mar 21   |
| Last day               | 12 Jan 21   | 12 Jan 21   | 28 Jan 21   | 27 Jan 21   | 08 Feb 21   | 10 Feb 21   | 24 Feb 21   | 23 Feb 21   | 08 Mar 21   | 10 Mar 21   |
| <b>Household size</b>  |             |             |             |             |             |             |             |             |             |             |
| 1                      | 362 (33.6%) | NA          | 334 (34.5%) | NA          | 299 (34.3%) | NA          | 273 (34.9%) | NA          | 267 (38.0%) | NA          |
| 2                      | 449 (41.7%) | 16 (6.2%)   | 377 (39.0%) | 21 (8.9%)   | 372 (42.6%) | 21 (9.9%)   | 341 (43.6%) | 16 (8.6%)   | 227 (32.3%) | 10 (5.9%)   |
| 3-5                    | 262 (24.4%) | 241 (93.1%) | 251 (25.9%) | 212 (89.8%) | 201 (23.0%) | 189 (89.2%) | 167 (21.3%) | 171 (91.4%) | 208 (29.6%) | 160 (93.6%) |
| 6+                     | 3 (0.3%)    | 2 (0.8%)    | 6 (0.6%)    | 3 (1.3%)    | 1 (0.1%)    | 2 (0.9%)    | 2 (0.3%)    | NA          | 1 (0.1%)    | 1 (0.6%)    |

Note: Wave A refers to CoMix surveys collecting behavioural data for adults whereas Wave C refers to CoMix surveys collecting behavioural data from adults responding on behalf of a randomly selected child.

**Table S3 (continued) CoMix sample characteristics for the Netherlands**

| Characteristic         | Wave A 15   | Wave C 15   | Wave A 16   | Wave C 16   | Wave A 17   | Wave C 17   | Wave A 18   | Wave C 18   | Wave A 19   | Wave C 19   |
|------------------------|-------------|-------------|-------------|-------------|-------------|-------------|-------------|-------------|-------------|-------------|
| <b>All</b>             | 636         | 148         | 631         | 152         | 509         | 123         | 461         | 113         | 1200        | 286         |
| <b>Age</b>             |             |             |             |             |             |             |             |             |             |             |
| 0-4                    | NA          | 27 (18.2%)  | NA          | 23 (15.1%)  | NA          | 13 (10.6%)  | NA          | 16 (14.2%)  | NA          | 36 (12.6%)  |
| 5-11                   | NA          | 53 (35.8%)  | NA          | 50 (32.9%)  | NA          | 40 (32.5%)  | NA          | 30 (26.6%)  | NA          | 91 (31.8%)  |
| 12-15                  | NA          | 48 (32.4%)  | NA          | 52 (34.2%)  | NA          | 50 (40.7%)  | NA          | 42 (37.2%)  | NA          | 111 (38.8%) |
| 16-17                  | NA          | 20 (13.5%)  | NA          | 27 (17.8%)  | NA          | 20 (16.3%)  | NA          | 25 (22.1%)  | NA          | 48 (16.8%)  |
| 18-29                  | 114 (17.9%) | NA          | 141 (22.4%) | NA          | 132 (25.9%) | NA          | 107 (23.2%) | NA          | 298 (24.8%) | NA          |
| 30-39                  | 111 (17.5%) | NA          | 120 (19.0%) | NA          | 105 (20.6%) | NA          | 103 (22.3%) | NA          | 176 (14.7%) | NA          |
| 40-49                  | 88 (13.8%)  | NA          | 114 (18.1%) | NA          | 107 (21.0%) | NA          | 86 (18.7%)  | NA          | 167 (13.9%) | NA          |
| 50-59                  | 112 (17.6%) | NA          | 110 (17.4%) | NA          | 70 (13.8%)  | NA          | 107 (23.2%) | NA          | 208 (17.3%) | NA          |
| 60-69                  | 142 (22.3%) | NA          | 89 (14.1%)  | NA          | 67 (13.2%)  | NA          | 43 (9.3%)   | NA          | 222 (18.5%) | NA          |
| 70-120                 | 69 (10.9%)  | NA          | 57 (9.0%)   | NA          | 28 (5.5%)   | NA          | 15 (3.3%)   | NA          | 129 (10.8%) | NA          |
| <b>Gender</b>          |             |             |             |             |             |             |             |             |             |             |
| Female                 | 323 (50.8%) | 77 (52.0%)  | 307 (48.7%) | 75 (49.3%)  | 255 (50.1%) | 61 (49.6%)  | 237 (51.4%) | 51 (45.1%)  | 655 (54.6%) | 137 (47.9%) |
| Male                   | 313 (49.2%) | 71 (48.0%)  | 324 (51.4%) | 77 (50.7%)  | 254 (49.9%) | 62 (50.4%)  | 224 (48.6%) | 62 (54.8%)  | 545 (45.4%) | 149 (52.1%) |
| <b>Day</b>             |             |             |             |             |             |             |             |             |             |             |
| Sunday                 | 153 (24.1%) | 22 (14.9%)  | 152 (24.1%) | 35 (23.0%)  | 35 (6.9%)   | 7 (5.7%)    | NA          | NA          | 438 (36.5%) | 56 (19.6%)  |
| Monday                 | 454 (71.4%) | 124 (83.8%) | 13 (2.1%)   | NA          | 145 (28.5%) | NA          | 3 (0.7%)    | NA          | 82 (6.8%)   | 27 (9.4%)   |
| Tuesday                | NA          | NA          | 58 (9.2%)   | NA          | 11 (2.2%)   | NA          | NA          | NA          | 159 (13.3%) | 52 (18.2%)  |
| Wednesday              | 3 (0.5%)    | NA          | 195 (30.9%) | 36 (23.7%)  | NA          | NA          | 227 (49.2%) | 64 (56.6%)  | 71 (5.9%)   | 4 (1.4%)    |
| Thursday               | 10 (1.6%)   | NA          | 129 (20.4%) | 32 (21.1%)  | 174 (34.2%) | 70 (56.9%)  | 192 (41.7%) | 49 (43.4%)  | 277 (23.1%) | 41 (14.3%)  |
| Friday                 | 1 (0.2%)    | NA          | 51 (8.1%)   | 29 (19.1%)  | 85 (16.7%)  | 34 (27.6%)  | 38 (8.2%)   | NA          | 92 (7.7%)   | 53 (18.5%)  |
| Saturday               | 15 (2.4%)   | 2 (1.4%)    | 33 (5.2%)   | 20 (13.2%)  | 59 (11.6%)  | 12 (9.8%)   | 1 (0.2%)    | NA          | 81 (6.8%)   | 53 (18.5%)  |
| <b>Data collection</b> |             |             |             |             |             |             |             |             |             |             |
| First day              | 18 Mar 21   | 20 Mar 21   | 31 Mar 21   | 31 Mar 21   | 15 Apr 21   | 15 Apr 21   | 28 Apr 21   | 28 Apr 21   | 12 May 21   | 12 May 21   |
| Last day               | 24 Mar 21   | 22 Mar 21   | 07 Apr 21   | 04 Apr 21   | 20 Apr 21   | 18 Apr 21   | 03 May 21   | 29 Apr 21   | 23 May 21   | 18 May 21   |
| <b>Household size</b>  |             |             |             |             |             |             |             |             |             |             |
| 1                      | 223 (35.1%) | NA          | 250 (39.6%) | NA          | 197 (38.7%) | NA          | 175 (38.0%) | NA          | 381 (31.8%) | NA          |
| 2                      | 269 (42.3%) | 11 (7.4%)   | 219 (34.7%) | 11 (7.2%)   | 166 (32.6%) | 10 (8.1%)   | 151 (32.8%) | 8 (7.1%)    | 472 (39.3%) | 17 (5.9%)   |
| 3-5                    | 142 (22.3%) | 136 (91.9%) | 161 (25.5%) | 140 (92.1%) | 144 (28.3%) | 112 (91.1%) | 135 (29.3%) | 104 (92.0%) | 341 (28.4%) | 268 (93.7%) |
| 6+                     | 2 (0.3%)    | 1 (0.7%)    | 1 (0.2%)    | 1 (0.7%)    | 2 (0.4%)    | 1 (0.8%)    | NA          | 1 (0.9%)    | 6 (0.5%)    | 1 (0.4%)    |

Note: Wave A refers to CoMix surveys collecting behavioural data for adults whereas Wave C refers to CoMix surveys collecting behavioural data from adults responding on behalf of a randomly selected child.

**Table S3 (continued) CoMix sample characteristics for the Netherlands**

| Characteristic         | Wave A 20   | Wave C 20   | Wave A 21   | Wave C 21   | Wave A 22    | Wave C 22   | Wave A 23   | Wave C 23   |
|------------------------|-------------|-------------|-------------|-------------|--------------|-------------|-------------|-------------|
| <b>All</b>             | 1054        | 256         | 961         | 222         | 861          | 195         | 771         | 176         |
| <b>Age</b>             |             |             |             |             |              |             |             |             |
| 0-4                    | NA          | 33 (12.9%)  | NA          | 31 (14.0%)  | NA           | 23 (11.8%)  | NA          | 24 (13.6%)  |
| 5-11                   | NA          | 85 (33.2%)  | NA          | 72 (32.4%)  | NA           | 72 (36.9%)  | NA          | 61 (34.7%)  |
| 12-15                  | NA          | 89 (34.8%)  | NA          | 87 (39.2%)  | NA           | 71 (36.4%)  | NA          | 60 (34.1%)  |
| 16-17                  | NA          | 49 (19.1%)  | NA          | 32 (14.4%)  | NA           | 29 (14.9%)  | NA          | 31 (17.6%)  |
| 18-29                  | 266 (25.2%) | NA          | 196 (20.4%) | NA          | 147 (17.1%)  | NA          | 147 (19.1%) | NA          |
| 30-39                  | 175 (16.6%) | NA          | 151 (15.7%) | NA          | 136 (15.8%)  | NA          | 123 (16.0%) | NA          |
| 40-49                  | 154 (14.6%) | NA          | 127 (13.2%) | NA          | 120 (13.9%)  | NA          | 123 (16.0%) | NA          |
| 50-59                  | 179 (17.0%) | NA          | 174 (18.1%) | NA          | 155 (18.00%) | NA          | 120 (15.6%) | NA          |
| 60-69                  | 170 (16.1%) | NA          | 199 (20.7%) | NA          | 186 (21.6%)  | NA          | 165 (21.4%) | NA          |
| 70-120                 | 110 (10.4%) | NA          | 114 (11.9%) | NA          | 117 (13.6%)  | NA          | 93 (12.1%)  | NA          |
| <b>Gender</b>          |             |             |             |             |              |             |             |             |
| Female                 | 580 (55.0%) | 119 (46.5%) | 521 (54.2%) | 104 (46.9%) | 438 (50.9%)  | 95 (48.7%)  | 390 (50.6%) | 81 (46.0%)  |
| Male                   | 474 (45.0%) | 137 (53.5%) | 440 (45.8%) | 118 (53.2%) | 423 (49.1%)  | 100 (51.3%) | 381 (49.4%) | 95 (54.0%)  |
| <b>Day</b>             |             |             |             |             |              |             |             |             |
| Sunday                 | 81 (7.7%)   | 52 (20.3%)  | 269 (28.0%) | 135 (60.8%) | 384 (44.6%)  | 13 (6.7%)   | 133 (17.3%) | 48 (27.3%)  |
| Monday                 | 66 (6.3%)   | 16 (6.3%)   | 64 (6.7%)   | 20 (9.0%)   | 264 (30.7%)  | 108 (55.4%) | 290 (37.6%) | 42 (23.9%)  |
| Tuesday                | 57 (5.4%)   | 13 (5.1%)   | 43 (4.5%)   | 12 (5.4%)   | 68 (7.9%)    | 52 (26.7%)  | NA          | 18 (10.2%)  |
| Wednesday              | 79 (7.5%)   | 36 (14.1%)  | 77 (8.0%)   | 14 (6.3%)   | 46 (5.3%)    | 5 (2.6%)    | 30 (3.9%)   | 17 (9.7%)   |
| Thursday               | 191 (18.1%) | 31 (12.1%)  | 180 (18.7%) | 27 (12.2%)  | 75 (8.7%)    | 10 (5.1%)   | 52 (6.7%)   | 23 (13.1%)  |
| Friday                 | 467 (44.3%) | 78 (30.5%)  | 152 (15.8%) | 5 (2.2%)    | 14 (1.6%)    | 7 (3.6%)    | 95 (12.3%)  | 9 (5.1%)    |
| Saturday               | 113 (10.7%) | 30 (11.7%)  | 176 (18.3%) | 9 (4.1%)    | 10 (1.2%)    | NA          | 171 (22.2%) | 19 (10.8%)  |
| <b>Data collection</b> |             |             |             |             |              |             |             |             |
| First day              | 26 May 21   | 26 May 21   | 09 Jun 21   | 09 Jun 21   | 23 Jun 21    | 23 Jun 21   | 07 Jul 21   | 07 Jul 21   |
| Last day               | 07 Jun 21   | 01 Jun 21   | 15 Jun 21   | 15 Jun 21   | 29 Jun 21    | 29 Jun 21   | 12 Jul 21   | 13 Jul 21   |
| <b>Household size</b>  |             |             |             |             |              |             |             |             |
| 1                      | 356 (33.8%) | NA          | 324 (33.7%) | NA          | 294 (34.2%)  | NA          | 280 (36.3%) | NA          |
| 2                      | 400 (38.0%) | 16 (6.3%)   | 384 (40.0%) | 15 (6.8%)   | 366 (42.5%)  | 14 (7.2%)   | 304 (39.4%) | 10 (5.7%)   |
| 3-5                    | 291 (27.6%) | 239 (93.4%) | 249 (25.9%) | 207 (93.2%) | 200 (23.2%)  | 180 (92.3%) | 186 (24.1%) | 166 (94.3%) |
| 6+                     | 7 (0.7%)    | 1 (0.4%)    | 4 (0.4%)    | NA          | 1 (0.1%)     | 1 (0.5%)    | 1 (0.1%)    | NA          |

Note: Wave A refers to CoMix surveys collecting behavioural data for adults whereas Wave C refers to CoMix surveys collecting behavioural data from adults responding on behalf of a randomly selected child.

## 1.4 France

**Table S4. CoMix sample characteristics for France**

| Characteristic         | Wave A 1    | Wave A 2    | Wave A 3    | Wave A 4    | Wave A 5    | Wave A 6    | Wave A 7    | Wave C 1    | Wave C 2    |
|------------------------|-------------|-------------|-------------|-------------|-------------|-------------|-------------|-------------|-------------|
| <b>All</b>             | 1564        | 1320        | 1122        | 954         | 812         | 690         | 585         | 308         | 297         |
| <b>Age</b>             |             |             |             |             |             |             |             |             |             |
| 0-4                    | NA          | NA          | NA          | NA          | NA          | NA          | NA          | 47 (15.3%)  | 40 (13.5%)  |
| 5-11                   | NA          | NA          | NA          | NA          | NA          | NA          | NA          | 85 (27.6%)  | 80 (26.9%)  |
| 12-15                  | NA          | NA          | NA          | NA          | NA          | NA          | NA          | 94 (30.5%)  | 99 (33.3%)  |
| 16-17                  | NA          | NA          | NA          | NA          | NA          | NA          | NA          | 82 (26.6%)  | 68 (22.9%)  |
| 18-29                  | 241 (15.4%) | 195 (14.8%) | 133 (11.9%) | 171 (17.9%) | 110 (13.5%) | 105 (15.2%) | 104 (17.8%) | NA          | NA          |
| 30-39                  | 265 (16.9%) | 217 (16.4%) | 160 (14.3%) | 177 (18.6%) | 147 (18.1%) | 135 (19.6%) | 123 (21.0%) | NA          | NA          |
| 40-49                  | 256 (16.4%) | 228 (17.3%) | 186 (16.6%) | 164 (17.2%) | 153 (18.8%) | 79 (11.4%)  | 98 (16.8%)  | NA          | NA          |
| 50-59                  | 251 (16.0%) | 212 (16.1%) | 190 (16.9%) | 158 (16.6%) | 182 (22.4%) | 7 (1.0%)    | 79 (13.5%)  | NA          | NA          |
| 60-69                  | 330 (21.1%) | 284 (21.5%) | 269 (24.0%) | 186 (19.5%) | 181 (22.3%) | 212 (30.7%) | 115 (19.7%) | NA          | NA          |
| 70-120                 | 221 (14.1%) | 184 (13.9%) | 184 (16.4%) | 98 (10.3%)  | 39 (4.8%)   | 152 (22.0%) | 66 (11.3%)  | NA          | NA          |
| NA/Other               | NA          | NA          | NA          | NA          | NA          | NA          | NA          | NA          | 10 (3.4%)   |
| <b>Gender</b>          |             |             |             |             |             |             |             |             |             |
| Female                 | 737 (47.1%) | 601 (45.5%) | 539 (48.0%) | 415 (43.5%) | 385 (47.4%) | 341 (49.4%) | 255 (43.6%) | 224 (72.7%) | 197 (66.3%) |
| Male                   | 820 (52.4%) | 716 (54.2%) | 581 (51.8%) | 534 (56.0%) | 426 (52.5%) | 347 (50.3%) | 328 (56.1%) | 84 (27.3%)  | 100 (33.7%) |
| Other or Missing       | 7 (0.4%)    | 3 (0.2%)    | 2 (0.2%)    | 5 (0.5%)    | 1 (0.1%)    | 2 (0.3%)    | 2 (0.3%)    | NA          | NA          |
| <b>Day</b>             |             |             |             |             |             |             |             |             |             |
| Sunday                 | 883 (56.5%) | 135 (10.2%) | NA          | NA          | 55 (6.8%)   | NA          | NA          | NA          | 17 (5.7%)   |
| Monday                 | 648 (41.4%) | 257 (19.5%) | NA          | NA          | NA          | NA          | NA          | 10 (3.2%)   | 30 (10.1%)  |
| Tuesday                | 7 (0.4%)    | NA          | 77 (6.9%)   | 391 (41.0%) | 93 (11.5%)  | 203 (29.4%) | 565 (96.6%) | 42 (13.6%)  | 2 (0.7%)    |
| Wednesday              | 26 (1.7%)   | 41 (3.1%)   | 898 (80.0%) | 401 (42.0%) | 135 (16.6%) | 204 (29.6%) | 20 (3.4%)   | 181 (58.8%) | 115 (38.7%) |
| Thursday               | NA          | 735 (55.7%) | 147 (13.1%) | 143 (15.0%) | 122 (15.0%) | 178 (25.8%) | NA          | 38 (12.3%)  | 88 (29.6%)  |
| Friday                 | NA          | 114 (8.6%)  | NA          | 19 (2.0%)   | 170 (20.9%) | 105 (15.2%) | NA          | 28 (9.1%)   | 33 (11.1%)  |
| Saturday               | NA          | 38 (2.9%)   | NA          | NA          | 237 (29.2%) | NA          | NA          | 9 (2.9%)    | 12 (4.0%)   |
| <b>Data collection</b> |             |             |             |             |             |             |             |             |             |
| First day              | 21 Dec 20   | 07 Jan 21   | 20 Jan 21   | 17 Feb 21   | 03 Mar 21   | 17 Mar 21   | 14 Apr 21   | 03 Feb 21   | 02 Apr 21   |
| Last day               | 29 Dec 20   | 12 Jan 21   | 22 Jan 21   | 20 Feb 21   | 08 Mar 21   | 20 Mar 21   | 15 Apr 21   | 09 Feb 21   | 08 Apr 21   |
| <b>Household size</b>  |             |             |             |             |             |             |             |             |             |
| 1                      | 371 (23.7%) | 304 (23.0%) | 286 (25.5%) | 232 (24.3%) | 201 (24.8%) | 175 (25.4%) | 137 (23.4%) | NA          | NA          |
| 2                      | 595 (38.0%) | 501 (38.0%) | 449 (40.0%) | 338 (35.4%) | 283 (34.9%) | 294 (42.6%) | 206 (35.2%) | 18 (5.8%)   | 21 (7.1%)   |
| 3-5                    | 571 (36.5%) | 493 (37.3%) | 374 (33.3%) | 368 (38.6%) | 314 (38.7%) | 211 (30.6%) | 230 (39.3%) | 282 (91.6%) | 266 (89.6%) |
| 6+                     | 27 (1.7%)   | 22 (1.7%)   | 13 (1.2%)   | 16 (1.7%)   | 14 (1.7%)   | 10 (1.4%)   | 12 (2.1%)   | 7 (2.3%)    | 8 (2.7%)    |
| 0                      | NA          | NA          | NA          | NA          | NA          | NA          | NA          | 1 (0.3%)    | 2 (0.7%)    |

Note: Wave A refers to CoMix surveys collecting behavioural data for adults whereas Wave C refers to CoMix surveys collecting behavioural data from adults responding on behalf of a randomly selected child.

## 1.5 Italy

**Table S5. CoMix sample characteristics for Italy**

| Characteristic         | Wave A 1    | Wave A 2    | Wave A 3    | Wave A 4    | Wave A 5    | Wave A 6    | Wave A 7    | Wave C 1    | Wave C 2    |
|------------------------|-------------|-------------|-------------|-------------|-------------|-------------|-------------|-------------|-------------|
| <b>All</b>             | 1559        | 1324        | 1125        | 955         | 811         | 689         | 591         | 306         | 297         |
| <b>Age</b>             |             |             |             |             |             |             |             |             |             |
| 0-4                    | NA          | NA          | NA          | NA          | NA          | NA          | NA          | 84 (27.5%)  | 77 (25.9%)  |
| 5-11                   | NA          | NA          | NA          | NA          | NA          | NA          | NA          | 85 (27.8%)  | 86 (29.0%)  |
| 12-15                  | NA          | NA          | NA          | NA          | NA          | NA          | NA          | 76 (24.8%)  | 71 (23.9%)  |
| 16-17                  | NA          | NA          | NA          | NA          | NA          | NA          | NA          | 61 (19.9%)  | 54 (18.2%)  |
| 18-29                  | 240 (15.4%) | 184 (13.9%) | 151 (13.4%) | 150 (15.7%) | 107 (13.2%) | 145 (21.0%) | 84 (14.2%)  | NA          | NA          |
| 30-39                  | 206 (13.2%) | 170 (12.8%) | 140 (12.4%) | 140 (14.7%) | 100 (12.3%) | 137 (19.9%) | 61 (10.3%)  | NA          | NA          |
| 40-49                  | 323 (20.7%) | 266 (20.1%) | 238 (21.2%) | 243 (25.4%) | 173 (21.3%) | 164 (23.8%) | 131 (22.2%) | NA          | NA          |
| 50-59                  | 239 (15.3%) | 206 (15.6%) | 178 (15.8%) | 190 (19.9%) | 143 (17.6%) | 64 (9.3%)   | 87 (14.7%)  | NA          | NA          |
| 60-69                  | 348 (22.3%) | 310 (23.4%) | 247 (22.0%) | 232 (24.3%) | 172 (21.2%) | 19 (2.8%)   | 116 (19.6%) | NA          | NA          |
| 70-120                 | 203 (13.0%) | 188 (14.2%) | 171 (15.2%) | NA          | 116 (14.3%) | 160 (23.2%) | 112 (19.0%) | NA          | NA          |
| NA/Other               | NA          | NA          | NA          | NA          | NA          | NA          | NA          | NA          | 9 (3.0%)    |
| <b>Gender</b>          |             |             |             |             |             |             |             |             |             |
| Female                 | 745 (47.8%) | 615 (46.5%) | 523 (46.5%) | 438 (45.9%) | 384 (47.3%) | 310 (45.0%) | 272 (46.0%) | 302 (98.7%) | 292 (98.3%) |
| Male                   | 810 (52.0%) | 709 (53.5%) | 601 (53.4%) | 517 (54.1%) | 426 (52.5%) | 379 (55.0%) | 319 (54.0%) | 1 (0.3%)    | 4 (1.3%)    |
| Other or Missing       | 4 (0.3%)    | NA          | 1 (0.1%)    | NA          | 1 (0.1%)    | NA          | NA          | 3 (1.0%)    | 1 (0.3%)    |
| <b>Day</b>             |             |             |             |             |             |             |             |             |             |
| Sunday                 | 734 (47.1%) | 90 (6.8%)   | NA          | 220 (23.0%) | NA          | NA          | 50 (8.5%)   | NA          | 9 (3.0%)    |
| Monday                 | 431 (27.6%) | 57 (4.3%)   | NA          | NA          | NA          | NA          | 8 (1.4%)    | 9 (2.9%)    | 8 (2.7%)    |
| Tuesday                | 233 (14.9%) | 7 (0.5%)    | 785 (69.8%) | 191 (20.0%) | 57 (7.0%)   | 28 (4.1%)   | 259 (43.8%) | 32 (10.5%)  | 79 (26.6%)  |
| Wednesday              | 130 (8.3%)  | 622 (47.0%) | 243 (21.6%) | 18 (1.9%)   | 6 (0.7%)    | 154 (22.4%) | 50 (8.5%)   | 60 (19.6%)  | NA          |
| Thursday               | 11 (0.7%)   | 407 (30.7%) | 97 (8.6%)   | 168 (17.6%) | 748 (92.2%) | 182 (26.4%) | 71 (12.0%)  | 205 (67.0%) | 176 (59.3%) |
| Friday                 | 12 (0.8%)   | 108 (8.2%)  | NA          | 167 (17.5%) | NA          | 176 (25.5%) | 49 (8.3%)   | NA          | 19 (6.4%)   |
| Saturday               | 8 (0.5%)    | 33 (2.5%)   | NA          | 191 (20.0%) | NA          | 149 (21.6%) | 104 (17.6%) | NA          | 6 (2.0%)    |
| <b>Data collection</b> |             |             |             |             |             |             |             |             |             |
| First day              | 21 Dec 20   | 07 Jan 21   | 20 Jan 21   | 17 Feb 21   | 03 Mar 21   | 17 Mar 21   | 14 Apr 21   | 03 Feb 21   | 02 Apr 21   |
| Last day               | 29 Dec 20   | 13 Jan 21   | 22 Jan 21   | 22 Feb 21   | 05 Mar 21   | 21 Mar 21   | 23 Apr 21   | 09 Feb 21   | 09 Apr 21   |
| <b>Household size</b>  |             |             |             |             |             |             |             |             |             |
| 1                      | 184 (11.8%) | 167 (12.6%) | 140 (12.4%) | 106 (11.1%) | 109 (13.4%) | 88 (12.8%)  | 83 (14.0%)  | NA          | NA          |
| 2                      | 512 (32.8%) | 446 (33.7%) | 385 (34.2%) | 281 (29.4%) | 287 (35.4%) | 225 (32.7%) | 193 (32.7%) | 13 (4.2%)   | 8 (2.7%)    |
| 3-5                    | 842 (54.0%) | 696 (52.6%) | 585 (52.0%) | 556 (58.2%) | 409 (50.4%) | 370 (53.7%) | 308 (52.1%) | 284 (92.8%) | 277 (93.3%) |
| 6+                     | 21 (1.3%)   | 15 (1.1%)   | 15 (1.3%)   | 12 (1.3%)   | 6 (0.7%)    | 6 (0.9%)    | 7 (1.2%)    | 9 (2.9%)    | 11 (3.7%)   |
| 0                      | NA          | NA          | NA          | NA          | NA          | NA          | NA          | NA          | 1 (0.3%)    |

Note: Wave A refers to CoMix surveys collecting behavioural data for adults whereas Wave C refers to CoMix surveys collecting behavioural data from adults responding on behalf of a randomly selected child.

## 1.6 Spain

**Table S6. CoMix sample characteristics for Spain**

| Characteristic         | Wave A 1    | Wave A 2    | Wave A 3    | Wave A 4    | Wave A 5    | Wave A 6    | Wave A 7    | Wave C 1    | Wave C 2    |
|------------------------|-------------|-------------|-------------|-------------|-------------|-------------|-------------|-------------|-------------|
| <b>All</b>             | 1569        | 1319        | 1126        | 956         | 815         | 688         | 586         | 294         | 297         |
| <b>Age</b>             |             |             |             |             |             |             |             |             |             |
| 0-4                    | NA          | NA          | NA          | NA          | NA          | NA          | NA          | 58 (19.7%)  | 54 (18.2%)  |
| 5-11                   | NA          | NA          | NA          | NA          | NA          | NA          | NA          | 125 (42.5%) | 121 (40.7%) |
| 12-15                  | NA          | NA          | NA          | NA          | NA          | NA          | NA          | 75 (25.5%)  | 88 (29.6%)  |
| 16-17                  | NA          | NA          | NA          | NA          | NA          | NA          | NA          | 36 (12.2%)  | 31 (10.4%)  |
| 18-29                  | 238 (15.2%) | 197 (14.9%) | 138 (12.3%) | 136 (14.2%) | 90 (11.0%)  | 124 (18.0%) | 107 (18.3%) | NA          | NA          |
| 30-39                  | 260 (16.6%) | 209 (15.8%) | 183 (16.3%) | 162 (16.9%) | 110 (13.5%) | 167 (24.3%) | 107 (18.3%) | NA          | NA          |
| 40-49                  | 328 (20.9%) | 275 (20.8%) | 232 (20.6%) | 219 (22.9%) | 185 (22.7%) | 210 (30.5%) | 135 (23.0%) | NA          | NA          |
| 50-59                  | 271 (17.3%) | 220 (16.7%) | 190 (16.9%) | 189 (19.8%) | 154 (18.9%) | 127 (18.5%) | 101 (17.2%) | NA          | NA          |
| 60-69                  | 299 (19.1%) | 264 (20.0%) | 244 (21.7%) | 162 (16.9%) | 198 (24.3%) | 60 (8.7%)   | 101 (17.2%) | NA          | NA          |
| 70-120                 | 173 (11.0%) | 154 (11.7%) | 139 (12.3%) | 88 (9.2%)   | 78 (9.6%)   | NA          | 35 (6.0%)   | NA          | NA          |
| NA/Other               | 4 (0.3%)    | 1 (0.1%)    | 2 (0.2%)    | 2 (0.2%)    | 2 (0.2%)    | NA          | NA          | NA          | NA          |
| <b>Gender</b>          |             |             |             |             |             |             |             |             |             |
| Female                 | 760 (48.4%) | 635 (48.1%) | 559 (49.6%) | 466 (48.7%) | 428 (52.5%) | 361 (52.5%) | 287 (49.0%) | 205 (69.7%) | 193 (65.0%) |
| Male                   | 805 (51.3%) | 683 (51.8%) | 565 (50.2%) | 488 (51.0%) | 385 (47.2%) | 327 (47.5%) | 299 (51.0%) | 89 (30.3%)  | 104 (35.0%) |
| Other or Missing       | 4 (0.3%)    | NA          | 1 (0.1%)    | NA          | 1 (0.1%)    | NA          | NA          | 3 (1.0%)    | 1 (0.3%)    |
| <b>Day</b>             |             |             |             |             |             |             |             |             |             |
| Sunday                 | 858 (54.7%) | 118 (8.9%)  | NA          | 294 (30.8%) | 130 (16.0%) | NA          | 268 (45.7%) | NA          | 1 (0.3%)    |
| Monday                 | 572 (36.5%) | 62 (4.7%)   | NA          | 402 (42.1%) | 3 (0.4%)    | NA          | NA          | NA          | 2 (0.7%)    |
| Tuesday                | 102 (6.5%)  | NA          | 871 (77.4%) | 52 (5.4%)   | 82 (10.1%)  | 178 (25.9%) | 295 (50.3%) | NA          | 225 (75.8%) |
| Wednesday              | 18 (1.1%)   | 339 (25.7%) | 230 (20.4%) | 10 (1.0%)   | 150 (18.4%) | 169 (24.6%) | 18 (3.1%)   | 274 (93.2%) | 17 (5.7%)   |
| Thursday               | 6 (0.4%)    | 543 (41.2%) | 25 (2.2%)   | 173 (18.1%) | 146 (17.9%) | 203 (29.5%) | 2 (0.3%)    | 20 (6.8%)   | 41 (13.8%)  |
| Friday                 | 6 (0.4%)    | 201 (15.2%) | NA          | 17 (1.8%)   | 128 (15.7%) | 138 (20.1%) | 1 (0.2%)    | NA          | 8 (2.7%)    |
| Saturday               | 7 (0.4%)    | 56 (4.2%)   | NA          | 8 (0.8%)    | 176 (21.6%) | NA          | 2 (0.3%)    | NA          | 3 (1.0%)    |
| <b>Data collection</b> |             |             |             |             |             |             |             |             |             |
| First day              | 21 Dec 20   | 07 Jan 21   | 20 Jan 21   | 17 Feb 21   | 03 Mar 21   | 17 Mar 21   | 14 Apr 21   | 01 Apr 21   | 06 May 21   |
| Last day               | 29 Dec 20   | 12 Jan 21   | 22 Jan 21   | 23 Feb 21   | 09 Mar 21   | 20 Mar 21   | 19 Apr 21   | 02 Apr 21   | 12 May 21   |
| <b>Household size</b>  |             |             |             |             |             |             |             |             |             |
| 1                      | 164 (10.5%) | 147 (11.1%) | 130 (11.5%) | 111 (11.6%) | 100 (12.3%) | 61 (8.9%)   | 60 (10.2%)  | NA          | NA          |
| 2                      | 521 (33.2%) | 458 (34.7%) | 416 (36.9%) | 323 (33.8%) | 295 (36.2%) | 198 (28.8%) | 195 (33.3%) | 10 (3.4%)   | 6 (2.0%)    |
| 3-5                    | 846 (53.9%) | 689 (52.2%) | 558 (49.6%) | 502 (52.5%) | 406 (49.8%) | 413 (60.0%) | 322 (54.9%) | 278 (94.6%) | 287 (96.6%) |
| 6+                     | 38 (2.4%)   | 25 (1.9%)   | 22 (2.0%)   | 20 (2.1%)   | 14 (1.7%)   | 16 (2.3%)   | 9 (1.5%)    | 6 (2.0%)    | 4 (1.3%)    |

Note: Wave A refers to CoMix surveys collecting behavioural data for adults whereas Wave C refers to CoMix surveys collecting behavioural data from adults responding on behalf of a randomly selected child.

## 1.7 Austria

**Table S7. CoMix sample characteristics for Austria**

| Characteristic         | Wave A 1    | Wave A 2    | Wave A 3    | Wave A 4    | Wave A 5    | Wave A 6    | Wave A 7    | Wave C 1    | Wave C 2    |
|------------------------|-------------|-------------|-------------|-------------|-------------|-------------|-------------|-------------|-------------|
| <b>All</b>             | 1554        | 1317        | 1126        | 955         | 812         | 687         | 586         | 306         | 299         |
| <b>Age</b>             |             |             |             |             |             |             |             |             |             |
| 0-4                    | NA          | NA          | NA          | NA          | NA          | NA          | NA          | 121 (39.5%) | 105 (35.1%) |
| 5-11                   | NA          | NA          | NA          | NA          | NA          | NA          | NA          | 95 (31.0%)  | 108 (36.1%) |
| 12-15                  | NA          | NA          | NA          | NA          | NA          | NA          | NA          | 63 (20.6%)  | 59 (19.7%)  |
| 16-17                  | NA          | NA          | NA          | NA          | NA          | NA          | NA          | 27 (8.8%)   | 23 (7.7%)   |
| 18-29                  | 306 (19.7%) | 257 (19.5%) | 189 (16.8%) | 164 (17.2%) | 142 (17.5%) | 125 (18.2%) | 122 (20.8%) | NA          | NA          |
| 30-39                  | 277 (17.8%) | 237 (18.0%) | 202 (17.9%) | 151 (15.8%) | 124 (15.3%) | 122 (17.8%) | 102 (17.4%) | NA          | NA          |
| 40-49                  | 259 (16.7%) | 224 (17.0%) | 195 (17.3%) | 159 (16.6%) | 127 (15.6%) | 111 (16.2%) | 104 (17.7%) | NA          | NA          |
| 50-59                  | 306 (19.7%) | 234 (17.8%) | 224 (19.9%) | 197 (20.6%) | 170 (20.9%) | 138 (20.1%) | 106 (18.1%) | NA          | NA          |
| 60-69                  | 275 (17.7%) | 235 (17.8%) | 213 (18.9%) | 182 (19.1%) | 173 (21.3%) | 123 (17.9%) | 98 (16.7%)  | NA          | NA          |
| 70-120                 | 131 (8.4%)  | 130 (9.9%)  | 103 (9.1%)  | 102 (10.7%) | 76 (9.4%)   | 68 (9.9%)   | 54 (9.2%)   | NA          | NA          |
| NA/Other               | NA          | NA          | NA          | NA          | NA          | NA          | NA          | NA          | 4 (1.3%)    |
| <b>Gender</b>          |             |             |             |             |             |             |             |             |             |
| Female                 | 753 (48.5%) | 632 (48.0%) | 540 (48.0%) | 434 (45.4%) | 351 (43.2%) | 322 (46.9%) | 267 (45.6%) | 202 (66.0%) | 198 (66.2%) |
| Male                   | 798 (51.4%) | 684 (51.9%) | 585 (52.0%) | 519 (54.3%) | 459 (56.5%) | 365 (53.1%) | 316 (53.9%) | 101 (33.0%) | 101 (33.8%) |
| Other or Missing       | 3 (0.2%)    | 1 (0.1%)    | 1 (0.1%)    | 2 (0.2%)    | 2 (0.2%)    | NA          | 3 (0.5%)    | 3 (1.0%)    | NA          |
| <b>Day</b>             |             |             |             |             |             |             |             |             |             |
| Sunday                 | 375 (24.1%) | 68 (5.2%)   | NA          | 386 (40.4%) | 160 (19.7%) | 447 (65.1%) | 369 (63.0%) | 107 (35.0%) | 14 (4.7%)   |
| Monday                 | 367 (23.6%) | 53 (4.0%)   | NA          | NA          | NA          | NA          | NA          | 10 (3.3%)   | 18 (6.0%)   |
| Tuesday                | 242 (15.6%) | 135 (10.3%) | 95 (8.4%)   | 41 (4.3%)   | 57 (7.0%)   | 77 (11.2%)  | 21 (3.6%)   | 21 (6.9%)   | 5 (1.7%)    |
| Wednesday              | 112 (7.2%)  | 44 (3.3%)   | 904 (80.3%) | 113 (11.8%) | 122 (15.0%) | 131 (19.1%) | 55 (9.4%)   | 39 (12.7%)  | 153 (51.2%) |
| Thursday               | 52 (3.3%)   | 538 (40.9%) | 104 (9.2%)  | 105 (11.0%) | 175 (21.6%) | 20 (2.9%)   | 41 (7.0%)   | 48 (15.7%)  | 60 (20.1%)  |
| Friday                 | 25 (1.6%)   | 303 (23.0%) | 23 (2.0%)   | 24 (2.5%)   | 134 (16.5%) | 4 (0.6%)    | 50 (8.5%)   | 34 (11.1%)  | NA          |
| Saturday               | 381 (24.5%) | 176 (13.4%) | NA          | 286 (29.9%) | 164 (20.2%) | 8 (1.2%)    | 50 (8.5%)   | 47 (15.4%)  | 49 (16.4%)  |
| <b>Data collection</b> |             |             |             |             |             |             |             |             |             |
| First day              | 22 Dec 20   | 07 Jan 21   | 20 Jan 21   | 17 Feb 21   | 03 Mar 21   | 17 Mar 21   | 14 Apr 21   | 03 Feb 21   | 02 Apr 21   |
| Last day               | 06 Jan 21   | 13 Jan 21   | 23 Jan 21   | 22 Feb 21   | 08 Mar 21   | 22 Mar 21   | 19 Apr 21   | 09 Feb 21   | 08 Apr 21   |
| <b>Household size</b>  |             |             |             |             |             |             |             |             |             |
| 1                      | 412 (26.5%) | 367 (27.9%) | 311 (27.6%) | 275 (28.8%) | 245 (30.2%) | 199 (29.0%) | 168 (28.7%) | NA          | NA          |
| 2                      | 621 (40.0%) | 526 (39.9%) | 461 (40.9%) | 389 (40.7%) | 325 (40.0%) | 285 (41.5%) | 243 (41.5%) | 24 (7.8%)   | 27 (9.0%)   |
| 3-5                    | 494 (31.8%) | 405 (30.8%) | 337 (29.9%) | 278 (29.1%) | 232 (28.6%) | 193 (28.1%) | 167 (28.5%) | 273 (89.2%) | 265 (88.6%) |
| 6+                     | 27 (1.7%)   | 19 (1.4%)   | 17 (1.5%)   | 13 (1.4%)   | 10 (1.2%)   | 10 (1.5%)   | 8 (1.4%)    | 9 (2.9%)    | 7 (2.3%)    |

Note: Wave A refers to CoMix surveys collecting behavioural data for adults whereas Wave C refers to CoMix surveys collecting behavioural data from adults responding on behalf of a randomly selected child.

## 1.8 Denmark

**Table S8. CoMix sample characteristics for Denmark**

| Characteristic         | Wave A 1    | Wave A 2    | Wave A 3    | Wave A 4    | Wave A 5    | Wave A 6    | Wave A 7    | Wave C 1    | Wave C 2    |
|------------------------|-------------|-------------|-------------|-------------|-------------|-------------|-------------|-------------|-------------|
| <b>All</b>             | 1558        | 1323        | 1125        | 959         | 815         | 690         | 587         | 307         | 294         |
| <b>Age</b>             |             |             |             |             |             |             |             |             |             |
| 0-4                    | NA          | NA          | NA          | NA          | NA          | NA          | NA          | 85 (27.7%)  | 78 (26.5%)  |
| 5-11                   | NA          | NA          | NA          | NA          | NA          | NA          | NA          | 112 (36.5%) | 101 (34.4%) |
| 12-15                  | NA          | NA          | NA          | NA          | NA          | NA          | NA          | 90 (29.3%)  | 98 (33.3%)  |
| 16-17                  | NA          | NA          | NA          | NA          | NA          | NA          | NA          | 20 (6.5%)   | 14 (4.8%)   |
| 18-29                  | 273 (17.5%) | 196 (14.8%) | 149 (13.2%) | 124 (12.9%) | 108 (13.3%) | 77 (11.2%)  | 69 (11.8%)  | NA          | NA          |
| 30-39                  | 160 (10.3%) | 151 (11.4%) | 119 (10.6%) | 98 (10.2%)  | 87 (10.7%)  | 72 (10.4%)  | 59 (10.1%)  | NA          | NA          |
| 40-49                  | 198 (12.7%) | 201 (15.2%) | 164 (14.6%) | 131 (13.7%) | 102 (12.5%) | 92 (13.3%)  | 77 (13.1%)  | NA          | NA          |
| 50-59                  | 316 (20.3%) | 295 (22.3%) | 249 (22.1%) | 213 (22.2%) | 200 (24.5%) | 169 (24.5%) | 142 (24.2%) | NA          | NA          |
| 60-69                  | 333 (21.4%) | 280 (21.2%) | 257 (22.8%) | 223 (23.3%) | 187 (22.9%) | 174 (25.2%) | 154 (26.2%) | NA          | NA          |
| 70-120                 | 278 (17.8%) | 200 (15.1%) | 187 (16.6%) | 170 (17.7%) | 131 (16.1%) | 106 (15.4%) | 86 (14.7%)  | NA          | NA          |
| NA/Other               | NA          | NA          | NA          | NA          | NA          | NA          | NA          | NA          | 3 (1.0%)    |
| <b>Gender</b>          |             |             |             |             |             |             |             |             |             |
| Female                 | 768 (49.3%) | 609 (46.0%) | 510 (45.3%) | 448 (46.7%) | 396 (48.6%) | 325 (47.1%) | 271 (46.2%) | 172 (56.0%) | 168 (57.1%) |
| Male                   | 788 (50.6%) | 713 (53.9%) | 612 (54.4%) | 509 (53.1%) | 416 (51.0%) | 364 (52.8%) | 315 (53.7%) | 135 (44.0%) | 125 (42.5%) |
| Other or Missing       | 2 (0.1%)    | 1 (0.1%)    | 3 (0.3%)    | 2 (0.2%)    | 3 (0.4%)    | 1 (0.1%)    | 1 (0.2%)    | NA          | 1 (0.3%)    |
| <b>Day</b>             |             |             |             |             |             |             |             |             |             |
| Sunday                 | 219 (14.1%) | 115 (8.7%)  | NA          | 28 (2.9%)   | 55 (6.7%)   | NA          | NA          | 21 (6.8%)   | 13 (4.4%)   |
| Monday                 | 494 (31.7%) | 33 (2.5%)   | NA          | 337 (35.1%) | 57 (7.0%)   | NA          | NA          | 14 (4.6%)   | 123 (41.8%) |
| Tuesday                | 361 (23.2%) | 116 (8.8%)  | 156 (13.9%) | 139 (14.5%) | 117 (14.4%) | 25 (3.6%)   | 84 (14.3%)  | 32 (10.4%)  | 40 (13.6%)  |
| Wednesday              | 143 (9.2%)  | 170 (12.8%) | 833 (74.0%) | 190 (19.8%) | 163 (20.0%) | 140 (20.3%) | 74 (12.6%)  | 72 (23.5%)  | 43 (14.6%)  |
| Thursday               | 170 (10.9%) | 738 (55.8%) | 136 (12.1%) | 51 (5.3%)   | 175 (21.5%) | 202 (29.3%) | 429 (73.1%) | 71 (23.1%)  | 52 (17.7%)  |
| Friday                 | 112 (7.2%)  | 102 (7.7%)  | NA          | 117 (12.2%) | 126 (15.5%) | 243 (35.2%) | NA          | 59 (19.2%)  | 8 (2.7%)    |
| Saturday               | 59 (3.8%)   | 49 (3.7%)   | NA          | 97 (10.1%)  | 122 (15.0%) | 80 (11.6%)  | NA          | 38 (12.4%)  | 15 (5.1%)   |
| <b>Data collection</b> |             |             |             |             |             |             |             |             |             |
| First day              | 22 Dec 20   | 07 Jan 21   | 20 Jan 21   | 17 Feb 21   | 03 Mar 21   | 17 Mar 21   | 14 Apr 21   | 03 Feb 21   | 02 Apr 21   |
| Last day               | 06 Jan 21   | 14 Jan 21   | 22 Jan 21   | 23 Feb 21   | 09 Mar 21   | 21 Mar 21   | 16 Apr 21   | 09 Feb 21   | 12 Apr 21   |
| <b>Household size</b>  |             |             |             |             |             |             |             |             |             |
| 1                      | 445 (28.6%) | 380 (28.7%) | 338 (30.0%) | 289 (30.1%) | 248 (30.4%) | 218 (31.6%) | 179 (30.5%) | NA          | NA          |
| 2                      | 737 (47.3%) | 600 (45.4%) | 511 (45.4%) | 433 (45.2%) | 365 (44.8%) | 316 (45.8%) | 269 (45.8%) | 23 (7.5%)   | 20 (6.8%)   |
| 3-5                    | 366 (23.5%) | 336 (25.4%) | 266 (23.6%) | 231 (24.1%) | 196 (24.0%) | 155 (22.5%) | 135 (23.0%) | 272 (88.6%) | 263 (89.5%) |
| 6+                     | 10 (0.6%)   | 7 (0.5%)    | 10 (0.9%)   | 6 (0.6%)    | 6 (0.7%)    | 1 (0.1%)    | 4 (0.7%)    | 12 (3.9%)   | 11 (3.7%)   |

Note: Wave A refers to CoMix surveys collecting behavioural data for adults whereas Wave C refers to CoMix surveys collecting behavioural data from adults responding on behalf of a randomly selected child.



## 1.9 Poland

**Table S9. CoMix sample characteristics for Poland**

| Characteristic         | Wave A 1    | Wave A 2    | Wave A 3    | Wave A 4    | Wave A 5    | Wave A 6    | Wave A 7    | Wave C 1    | Wave C 2    |
|------------------------|-------------|-------------|-------------|-------------|-------------|-------------|-------------|-------------|-------------|
| <b>All</b>             | 1543        | 1310        | 1125        | 954         | 809         | 684         | 586         | 305         | 292         |
| <b>Age</b>             |             |             |             |             |             |             |             |             |             |
| 0-4                    | NA          | NA          | NA          | NA          | NA          | NA          | NA          | 89 (29.2%)  | 84 (28.8%)  |
| 5-11                   | NA          | NA          | NA          | NA          | NA          | NA          | NA          | 104 (34.1%) | 98 (33.6%)  |
| 12-15                  | NA          | NA          | NA          | NA          | NA          | NA          | NA          | 63 (20.7%)  | 62 (21.2%)  |
| 16-17                  | NA          | NA          | NA          | NA          | NA          | NA          | NA          | 49 (16.1%)  | 41 (14.0%)  |
| 18-29                  | 317 (20.5%) | 267 (20.4%) | 206 (18.3%) | 163 (17.1%) | 149 (18.4%) | 134 (19.6%) | 81 (13.8%)  | NA          | NA          |
| 30-39                  | 287 (18.6%) | 246 (18.8%) | 192 (17.1%) | 195 (20.4%) | 159 (19.7%) | 160 (23.4%) | 111 (18.9%) | NA          | NA          |
| 40-49                  | 299 (19.4%) | 245 (18.7%) | 206 (18.3%) | 220 (23.1%) | 149 (18.4%) | 135 (19.7%) | 90 (15.4%)  | NA          | NA          |
| 50-59                  | 266 (17.2%) | 236 (18.0%) | 207 (18.4%) | 201 (21.1%) | 138 (17.1%) | 103 (15.1%) | 113 (19.3%) | NA          | NA          |
| 60-69                  | 284 (18.4%) | 246 (18.8%) | 243 (21.6%) | 131 (13.7%) | 173 (21.4%) | 112 (16.4%) | 139 (23.7%) | NA          | NA          |
| 70-120                 | 90 (5.8%)   | 70 (5.3%)   | 71 (6.3%)   | 44 (4.6%)   | 41 (5.1%)   | 40 (5.8%)   | 52 (8.9%)   | NA          | NA          |
| NA/Other               | NA          | NA          | NA          | NA          | NA          | NA          | NA          | NA          | 7 (2.4%)    |
| <b>Gender</b>          |             |             |             |             |             |             |             |             |             |
| Female                 | 804 (52.1%) | 747 (57.0%) | 588 (52.3%) | 541 (56.7%) | 470 (58.1%) | 404 (59.1%) | 347 (59.2%) | 169 (55.4%) | 168 (57.5%) |
| Male                   | 739 (47.9%) | 563 (43.0%) | 537 (47.7%) | 413 (43.3%) | 339 (41.9%) | 280 (40.9%) | 239 (40.8%) | 136 (44.6%) | 124 (42.5%) |
| <b>Day</b>             |             |             |             |             |             |             |             |             |             |
| Sunday                 | 38 (2.5%)   | 46 (3.5%)   | 6 (0.5%)    | 220 (23.1%) | 161 (19.9%) | NA          | 9 (1.5%)    | 52 (17.0%)  | 3 (1.0%)    |
| Monday                 | 311 (20.2%) | 107 (8.2%)  | 8 (0.7%)    | NA          | NA          | NA          | NA          | 10 (3.3%)   | 67 (22.9%)  |
| Tuesday                | 813 (52.7%) | 82 (6.3%)   | 849 (75.5%) | 130 (13.6%) | 115 (14.2%) | 67 (9.8%)   | 56 (9.6%)   | 80 (26.2%)  | 23 (7.9%)   |
| Wednesday              | 234 (15.2%) | 365 (27.9%) | 206 (18.3%) | 87 (9.1%)   | 25 (3.1%)   | 70 (10.2%)  | 74 (12.6%)  | 23 (7.5%)   | 145 (49.7%) |
| Thursday               | 77 (5.0%)   | 552 (42.1%) | 38 (3.4%)   | 162 (17.0%) | 63 (7.8%)   | 170 (24.9%) | 66 (11.3%)  | 14 (4.6%)   | 46 (15.8%)  |
| Friday                 | 42 (2.7%)   | 125 (9.5%)  | 7 (0.6%)    | 162 (17.0%) | 392 (48.5%) | 169 (24.7%) | 334 (57.0%) | 48 (15.7%)  | 7 (2.4%)    |
| Saturday               | 28 (1.8%)   | 33 (2.5%)   | 11 (1.0%)   | 193 (20.2%) | 53 (6.6%)   | 208 (30.4%) | 47 (8.0%)   | 78 (25.6%)  | 1 (0.3%)    |
| <b>Data collection</b> |             |             |             |             |             |             |             |             |             |
| First day              | 22 Dec 20   | 07 Jan 21   | 20 Jan 21   | 17 Feb 21   | 03 Mar 21   | 17 Mar 21   | 14 Apr 21   | 03 Feb 21   | 02 Apr 21   |
| Last day               | 06 Jan 21   | 13 Jan 21   | 26 Jan 21   | 22 Feb 21   | 08 Mar 21   | 21 Mar 21   | 19 Apr 21   | 09 Feb 21   | 08 Apr 21   |
| <b>Household size</b>  |             |             |             |             |             |             |             |             |             |
| 1                      | 195 (12.6%) | 183 (14.0%) | 159 (14.1%) | 128 (13.4%) | 119 (14.7%) | 87 (12.7%)  | 94 (16.0%)  | NA          | NA          |
| 2                      | 446 (28.9%) | 360 (27.5%) | 355 (31.6%) | 252 (26.4%) | 227 (28.1%) | 175 (25.6%) | 175 (29.9%) | 7 (2.3%)    | 2 (0.7%)    |
| 3-5                    | 826 (53.5%) | 709 (54.1%) | 564 (50.1%) | 536 (56.2%) | 427 (52.8%) | 395 (57.7%) | 298 (50.9%) | 284 (93.1%) | 275 (94.2%) |
| 6+                     | 76 (4.9%)   | 58 (4.4%)   | 47 (4.2%)   | 38 (4.0%)   | 36 (4.4%)   | 27 (3.9%)   | 19 (3.2%)   | 14 (4.6%)   | 15 (5.1%)   |

Note: Wave A refers to CoMix surveys collecting behavioural data for adults whereas Wave C refers to CoMix surveys collecting behavioural data from adults responding on behalf of a randomly selected child.

## 1.10 Portugal

**Table S10. CoMix sample characteristics for Portugal**

| Characteristic         | Wave A 1    | Wave A 2    | Wave A 3    | Wave A 4    | Wave A 5    | Wave A 6    | Wave A 7    | Wave C 1    | Wave C 2    |
|------------------------|-------------|-------------|-------------|-------------|-------------|-------------|-------------|-------------|-------------|
| <b>All</b>             | 1549        | 1309        | 1124        | 959         | 813         | 691         | 586         | 291         | 294         |
| <b>Age</b>             |             |             |             |             |             |             |             |             |             |
| 0-4                    | NA          | NA          | NA          | NA          | NA          | NA          | NA          | 70 (24.1%)  | 69 (23.5%)  |
| 5-11                   | NA          | NA          | NA          | NA          | NA          | NA          | NA          | 97 (33.3%)  | 93 (31.6%)  |
| 12-15                  | NA          | NA          | NA          | NA          | NA          | NA          | NA          | 72 (24.7%)  | 74 (25.2%)  |
| 16-17                  | NA          | NA          | NA          | NA          | NA          | NA          | NA          | 52 (17.9%)  | 46 (15.6%)  |
| 18-29                  | 300 (19.4%) | 200 (15.3%) | 197 (17.5%) | 156 (16.3%) | 132 (16.2%) | 77 (11.1%)  | 62 (10.6%)  | NA          | NA          |
| 30-39                  | 239 (15.4%) | 234 (17.9%) | 157 (14.0%) | 166 (17.3%) | 135 (16.6%) | 111 (16.1%) | 92 (15.7%)  | NA          | NA          |
| 40-49                  | 304 (19.6%) | 313 (23.9%) | 224 (19.9%) | 219 (22.8%) | 163 (20.0%) | 172 (24.9%) | 138 (23.5%) | NA          | NA          |
| 50-59                  | 304 (19.6%) | 252 (19.3%) | 217 (19.3%) | 166 (17.3%) | 160 (19.7%) | 131 (19.0%) | 118 (20.1%) | NA          | NA          |
| 60-69                  | 272 (17.6%) | 214 (16.3%) | 226 (20.1%) | 175 (18.2%) | 159 (19.6%) | 129 (18.7%) | 118 (20.1%) | NA          | NA          |
| 70-120                 | 130 (8.4%)  | 96 (7.3%)   | 103 (9.2%)  | 77 (8.0%)   | 64 (7.9%)   | 71 (10.3%)  | 58 (9.9%)   | NA          | NA          |
| NA/Other               | NA          | NA          | NA          | NA          | NA          | NA          | NA          | NA          | 12 (4.1%)   |
| <b>Gender</b>          |             |             |             |             |             |             |             |             |             |
| Female                 | 715 (46.2%) | 605 (46.2%) | 483 (43.0%) | 461 (48.1%) | 369 (45.4%) | 320 (46.3%) | 246 (42.0%) | 130 (44.7%) | 138 (46.9%) |
| Male                   | 829 (53.5%) | 702 (53.6%) | 640 (56.9%) | 496 (51.7%) | 442 (54.4%) | 370 (53.5%) | 340 (58.0%) | 161 (55.3%) | 156 (53.1%) |
| Other or Missing       | 5 (0.3%)    | 2 (0.2%)    | 1 (0.1%)    | 2 (0.2%)    | 2 (0.2%)    | 1 (0.1%)    | NA          | NA          | NA          |
| <b>Day</b>             |             |             |             |             |             |             |             |             |             |
| Sunday                 | 80 (5.2%)   | 637 (48.7%) | NA          | 350 (36.5%) | 504 (62.0%) | NA          | 262 (44.7%) | 90 (30.9%)  | 95 (32.3%)  |
| Monday                 | 271 (17.5%) | 164 (12.5%) | NA          | 142 (14.8%) | NA          | NA          | 109 (18.6%) | 60 (20.6%)  | 40 (13.6%)  |
| Tuesday                | 527 (34.0%) | 103 (7.9%)  | 190 (16.9%) | 18 (1.9%)   | 33 (4.1%)   | 53 (7.7%)   | 4 (0.7%)    | 21 (7.2%)   | 3 (1.0%)    |
| Wednesday              | 352 (22.7%) | 309 (23.6%) | 423 (37.6%) | 85 (8.9%)   | 16 (2.0%)   | 240 (34.7%) | 47 (8.0%)   | 85 (29.2%)  | 62 (21.1%)  |
| Thursday               | 123 (7.9%)  | 68 (5.2%)   | 379 (33.7%) | 106 (11.1%) | 82 (10.1%)  | 345 (49.9%) | 73 (12.5%)  | 35 (12.0%)  | 87 (29.6%)  |
| Friday                 | 132 (8.5%)  | 15 (1.1%)   | 92 (8.2%)   | 99 (10.3%)  | 79 (9.7%)   | 53 (7.7%)   | 44 (7.5%)   | NA          | 4 (1.4%)    |
| Saturday               | 64 (4.1%)   | 13 (1.0%)   | 40 (3.6%)   | 159 (16.6%) | 99 (12.2%)  | NA          | 47 (8.0%)   | NA          | 3 (1.0%)    |
| <b>Data collection</b> |             |             |             |             |             |             |             |             |             |
| First day              | 22 Dec 20   | 08 Jan 21   | 20 Jan 21   | 17 Feb 21   | 03 Mar 21   | 17 Mar 21   | 15 Apr 21   | 05 Apr 21   | 07 May 21   |
| Last day               | 07 Jan 21   | 14 Jan 21   | 24 Jan 21   | 23 Feb 21   | 08 Mar 21   | 20 Mar 21   | 22 Apr 21   | 09 Apr 21   | 14 May 21   |
| <b>Household size</b>  |             |             |             |             |             |             |             |             |             |
| 1                      | 203 (13.1%) | 179 (13.7%) | 159 (14.1%) | 137 (14.3%) | 115 (14.1%) | 94 (13.6%)  | 85 (14.5%)  | NA          | NA          |
| 2                      | 517 (33.4%) | 444 (33.9%) | 409 (36.4%) | 342 (35.7%) | 295 (36.3%) | 256 (37.0%) | 200 (34.1%) | 12 (4.1%)   | 9 (3.1%)    |
| 3-5                    | 816 (52.7%) | 675 (51.6%) | 547 (48.7%) | 474 (49.4%) | 394 (48.5%) | 334 (48.3%) | 296 (50.5%) | 275 (94.5%) | 282 (95.9%) |
| 6+                     | 13 (0.8%)   | 11 (0.8%)   | 9 (0.8%)    | 6 (0.6%)    | 9 (1.1%)    | 7 (1.0%)    | 5 (0.9%)    | 4 (1.4%)    | 3 (1.0%)    |

Note: Wave A refers to CoMix surveys collecting behavioural data for adults whereas Wave C refers to CoMix surveys collecting behavioural data from adults responding on behalf of a randomly selected child.

## 1.11 Greece

**Table S11. CoMix sample characteristics for Greece**

| Characteristic         | Wave A 1    | Wave A 2    | Wave A 3    | Wave A 4    | Wave A 5    | Wave A 6    | Wave C 1    | Wave C 2    |
|------------------------|-------------|-------------|-------------|-------------|-------------|-------------|-------------|-------------|
| <b>All</b>             | 1557        | 1319        | 1120        | 948         | 810         | 689         | 307         | 295         |
| <b>Age</b>             |             |             |             |             |             |             |             |             |
| 0-4                    | NA          | NA          | NA          | NA          | NA          | NA          | 54 (17.6%)  | 45 (15.3%)  |
| 5-11                   | NA          | NA          | NA          | NA          | NA          | NA          | 126 (41.0%) | 120 (40.7%) |
| 12-15                  | NA          | NA          | NA          | NA          | NA          | NA          | 74 (24.1%)  | 78 (26.4%)  |
| 16-17                  | NA          | NA          | NA          | NA          | NA          | NA          | 53 (17.3%)  | 42 (14.2%)  |
| 18-29                  | 327 (21.0%) | 221 (16.8%) | 171 (15.3%) | 146 (15.4%) | 118 (14.6%) | 86 (12.5%)  | NA          | NA          |
| 30-39                  | 335 (21.5%) | 313 (23.7%) | 239 (21.3%) | 197 (20.8%) | 156 (19.3%) | 132 (19.2%) | NA          | NA          |
| 40-49                  | 373 (24.0%) | 350 (26.5%) | 303 (27.1%) | 239 (25.2%) | 223 (27.5%) | 192 (27.9%) | NA          | NA          |
| 50-59                  | 342 (22.0%) | 293 (22.2%) | 277 (24.7%) | 245 (25.8%) | 206 (25.4%) | 189 (27.4%) | NA          | NA          |
| 60-69                  | 151 (9.7%)  | 122 (9.2%)  | 112 (10.0%) | 101 (10.7%) | 86 (10.6%)  | 75 (10.9%)  | NA          | NA          |
| 70-120                 | 29 (1.9%)   | 20 (1.5%)   | 18 (1.6%)   | 20 (2.1%)   | 21 (2.6%)   | 15 (2.2%)   | NA          | NA          |
| NA/Other               | NA          | NA          | NA          | NA          | NA          | NA          | NA          | 10 (3.4%)   |
| <b>Gender</b>          |             |             |             |             |             |             |             |             |
| Female                 | 778 (50.0%) | 677 (51.3%) | 542 (48.4%) | 458 (48.3%) | 368 (45.4%) | 325 (47.2%) | 151 (49.2%) | 145 (49.2%) |
| Male                   | 774 (49.7%) | 641 (48.6%) | 576 (51.4%) | 488 (51.5%) | 438 (54.1%) | 361 (52.4%) | 156 (50.8%) | 149 (50.5%) |
| Other or Missing       | 5 (0.3%)    | 1 (0.1%)    | 2 (0.2%)    | 2 (0.2%)    | 4 (0.5%)    | 3 (0.4%)    | NA          | 1 (0.3%)    |
| <b>Day</b>             |             |             |             |             |             |             |             |             |
| Sunday                 | 247 (15.9%) | 326 (24.7%) | 528 (47.1%) | 382 (40.3%) | 223 (27.5%) | 11 (1.6%)   | NA          | 13 (4.4%)   |
| Monday                 | 224 (14.4%) | 334 (25.3%) | 122 (10.9%) | 50 (5.3%)   | 13 (1.6%)   | NA          | 10 (3.3%)   | 2 (0.7%)    |
| Tuesday                | 103 (6.6%)  | 396 (30.0%) | 34 (3.0%)   | 8 (0.8%)    | NA          | NA          | NA          | 128 (43.4%) |
| Wednesday              | 319 (20.5%) | 199 (15.1%) | 58 (5.2%)   | 47 (5.0%)   | 52 (6.4%)   | 49 (7.1%)   | NA          | 51 (17.3%)  |
| Thursday               | 460 (29.5%) | 51 (3.9%)   | 181 (16.2%) | 196 (20.7%) | 201 (24.8%) | 266 (38.6%) | 225 (73.3%) | 64 (21.7%)  |
| Friday                 | 90 (5.8%)   | 6 (0.5%)    | 47 (4.2%)   | 157 (16.6%) | 176 (21.7%) | 222 (32.2%) | 54 (17.6%)  | 26 (8.8%)   |
| Saturday               | 114 (7.3%)  | 7 (0.5%)    | 150 (13.4%) | 108 (11.4%) | 145 (17.9%) | 141 (20.5%) | 18 (5.9%)   | 11 (3.7%)   |
| <b>Data collection</b> |             |             |             |             |             |             |             |             |
| First day              | 18 Feb 21   | 19 Mar 21   | 01 Apr 21   | 15 Apr 21   | 29 Apr 21   | 13 May 21   | 05 Feb 21   | 01 Apr 21   |
| Last day               | 26 Feb 21   | 25 Mar 21   | 12 Apr 21   | 22 Apr 21   | 04 May 21   | 17 May 21   | 09 Feb 21   | 07 Apr 21   |
| <b>Household size</b>  |             |             |             |             |             |             |             |             |
| 1                      | 244 (15.7%) | 219 (16.6%) | 188 (16.8%) | 168 (17.7%) | 144 (17.8%) | 129 (18.7%) | NA          | NA          |
| 2                      | 433 (27.8%) | 354 (26.8%) | 303 (27.1%) | 266 (28.1%) | 227 (28.0%) | 197 (28.6%) | 9 (2.9%)    | 9 (3.1%)    |
| 3-5                    | 847 (54.4%) | 720 (54.6%) | 606 (54.1%) | 500 (52.7%) | 424 (52.3%) | 349 (50.7%) | 289 (94.1%) | 277 (93.9%) |
| 6+                     | 33 (2.1%)   | 26 (2.0%)   | 23 (2.1%)   | 14 (1.5%)   | 15 (1.9%)   | 14 (2.0%)   | 9 (2.9%)    | 9 (3.1%)    |

Note: Wave A refers to CoMix surveys collecting behavioural data for adults whereas Wave C refers to CoMix surveys collecting behavioural data from adults responding on behalf of a randomly selected child.

## 1.12 Slovenia

**Table S12. CoMix sample characteristics for Slovenia**

| Characteristic         | Wave A 1    | Wave A 2    | Wave A 3    | Wave A 4    | Wave A 5    | Wave A 6    | Wave C 1    |
|------------------------|-------------|-------------|-------------|-------------|-------------|-------------|-------------|
| <b>All</b>             | 1542        | 1315        | 1119        | 947         | 907         | 797         | 300         |
| <b>Age</b>             |             |             |             |             |             |             |             |
| 0-4                    | NA          | NA          | NA          | NA          | NA          | NA          | 73 (24.3%)  |
| 5-11                   | NA          | NA          | NA          | NA          | NA          | NA          | 108 (36.0%) |
| 12-15                  | NA          | NA          | NA          | NA          | NA          | NA          | 85 (28.3%)  |
| 16-17                  | NA          | NA          | NA          | NA          | NA          | NA          | 34 (11.3%)  |
| 18-29                  | 308 (20.0%) | 225 (17.1%) | 181 (16.2%) | 128 (13.5%) | 132 (14.6%) | 98 (12.3%)  | NA          |
| 30-39                  | 344 (22.3%) | 277 (21.1%) | 231 (20.6%) | 187 (19.7%) | 172 (19.0%) | 149 (18.7%) | NA          |
| 40-49                  | 335 (21.7%) | 262 (19.9%) | 263 (23.5%) | 193 (20.4%) | 195 (21.5%) | 165 (20.7%) | NA          |
| 50-59                  | 279 (18.1%) | 274 (20.8%) | 224 (20.0%) | 212 (22.4%) | 201 (22.2%) | 181 (22.7%) | NA          |
| 60-69                  | 230 (14.9%) | 232 (17.6%) | 184 (16.4%) | 189 (20.0%) | 177 (19.5%) | 168 (21.1%) | NA          |
| 70-120                 | 46 (3.0%)   | 45 (3.4%)   | 36 (3.2%)   | 38 (4.0%)   | 30 (3.3%)   | 36 (4.5%)   | NA          |
| <b>Gender</b>          |             |             |             |             |             |             |             |
| Female                 | 856 (55.5%) | 769 (58.5%) | 639 (57.1%) | 539 (56.9%) | 508 (56.0%) | 446 (56.0%) | 176 (58.7%) |
| Male                   | 686 (44.5%) | 546 (41.5%) | 480 (42.9%) | 408 (43.1%) | 399 (44.0%) | 351 (44.0%) | 124 (41.3%) |
| <b>Day</b>             |             |             |             |             |             |             |             |
| Sunday                 | 538 (34.9%) | 347 (26.4%) | 264 (23.6%) | 530 (56.0%) | 293 (32.3%) | 134 (16.8%) | 37 (12.3%)  |
| Monday                 | 171 (11.1%) | 60 (4.6%)   | 346 (30.9%) | 77 (8.1%)   | 1 (0.1%)    | NA          | 54 (18.0%)  |
| Tuesday                | 149 (9.7%)  | 217 (16.5%) | 68 (6.1%)   | 13 (1.4%)   | NA          | NA          | 31 (10.3%)  |
| Wednesday              | 136 (8.8%)  | 114 (8.7%)  | 33 (2.9%)   | 49 (5.2%)   | 55 (6.1%)   | 71 (8.9%)   | 7 (2.3%)    |
| Thursday               | 351 (22.8%) | 363 (27.6%) | 296 (26.5%) | 116 (12.2%) | 250 (27.6%) | 258 (32.4%) | 117 (39.0%) |
| Friday                 | 143 (9.3%)  | 110 (8.4%)  | 76 (6.8%)   | 65 (6.9%)   | 150 (16.5%) | 172 (21.6%) | 33 (11.0%)  |
| Saturday               | 54 (3.5%)   | 104 (7.9%)  | 36 (3.2%)   | 97 (10.2%)  | 158 (17.4%) | 162 (20.3%) | 21 (7.0%)   |
| <b>Data collection</b> |             |             |             |             |             |             |             |
| First day              | 04 Mar 21   | 18 Mar 21   | 01 Apr 21   | 15 Apr 21   | 29 Apr 21   | 13 May 21   | 02 Apr 21   |
| Last day               | 15 Mar 21   | 25 Mar 21   | 12 Apr 21   | 22 Apr 21   | 04 May 21   | 17 May 21   | 12 Apr 21   |
| <b>Household size</b>  |             |             |             |             |             |             |             |
| 1                      | 199 (12.9%) | 173 (13.2%) | 149 (13.3%) | 133 (14.0%) | 134 (14.8%) | 116 (14.6%) | NA          |
| 2                      | 456 (29.6%) | 419 (31.9%) | 339 (30.3%) | 313 (33.1%) | 302 (33.3%) | 273 (34.3%) | 14 (4.7%)   |
| 3-5                    | 835 (54.2%) | 683 (51.9%) | 595 (53.2%) | 476 (50.3%) | 443 (48.8%) | 381 (47.8%) | 276 (92.0%) |
| 6+                     | 52 (3.4%)   | 40 (3.0%)   | 36 (3.2%)   | 25 (2.6%)   | 28 (3.1%)   | 27 (3.4%)   | 10 (3.3%)   |

Note: Wave A refers to CoMix surveys collecting behavioural data for adults whereas Wave C refers to CoMix surveys collecting behavioural data from adults responding on behalf of a randomly selected child.

## 1.13 Croatia

**Table S13. CoMix sample characteristics for Croatia**

| Characteristic         | Wave A 1    | Wave A 2    | Wave A 3    | Wave C 1    |
|------------------------|-------------|-------------|-------------|-------------|
| <b>All</b>             | 1548        | 1313        | 1181        | 299         |
| <b>Age</b>             |             |             |             |             |
| 0-4                    | NA          | NA          | NA          | 78 (26.1%)  |
| 5-11                   | NA          | NA          | NA          | 119 (39.8%) |
| 12-15                  | NA          | NA          | NA          | 65 (21.7%)  |
| 16-17                  | NA          | NA          | NA          | 37 (12.4%)  |
| 18-29                  | 292 (18.9%) | 263 (20.0%) | 207 (17.5%) | NA          |
| 30-39                  | 239 (15.4%) | 218 (16.6%) | 195 (16.5%) | NA          |
| 40-49                  | 289 (18.7%) | 256 (19.5%) | 234 (19.8%) | NA          |
| 50-59                  | 253 (16.3%) | 247 (18.8%) | 200 (16.9%) | NA          |
| 60-69                  | 366 (23.6%) | 257 (19.6%) | 268 (22.7%) | NA          |
| 70-120                 | 109 (7.0%)  | 72 (5.5%)   | 77 (6.5%)   | NA          |
| <b>Gender</b>          |             |             |             |             |
| Female                 | 812 (52.5%) | 687 (52.3%) | 617 (52.2%) | 153 (51.2%) |
| Male                   | 736 (47.5%) | 626 (47.7%) | 564 (47.8%) | 146 (48.8%) |
| <b>Day</b>             |             |             |             |             |
| Sunday                 | 394 (25.5%) | 258 (19.6%) | 26 (2.2%)   | NA          |
| Monday                 | 81 (5.2%)   | 33 (2.5%)   | 149 (12.6%) | 10 (3.3%)   |
| Tuesday                | 229 (14.8%) | 234 (17.8%) | 425 (36.0%) | 34 (11.4%)  |
| Wednesday              | 263 (17.0%) | 216 (16.5%) | 335 (28.4%) | 110 (36.8%) |
| Thursday               | 287 (18.5%) | 301 (22.9%) | 119 (10.1%) | 145 (48.5%) |
| Friday                 | 193 (12.5%) | 37 (2.8%)   | 96 (8.1%)   | NA          |
| Saturday               | 101 (6.5%)  | 234 (17.8%) | 31 (2.6%)   | NA          |
| <b>Data collection</b> |             |             |             |             |
| First day              | 20 Apr 21   | 06 May 21   | 25 May 21   | 08 Jun 21   |
| Last day               | 27 Apr 21   | 12 May 21   | 31 May 21   | 11 Jun 21   |
| <b>Household size</b>  |             |             |             |             |
| 1                      | 178 (11.5%) | 142 (10.8%) | 133 (11.3%) | NA          |
| 2                      | 492 (31.8%) | 395 (30.1%) | 360 (30.5%) | 8 (2.7%)    |
| 3-5                    | 828 (53.5%) | 733 (55.8%) | 653 (55.3%) | 269 (90.0%) |
| 6+                     | 50 (3.2%)   | 43 (3.3%)   | 35 (3.0%)   | 22 (7.4%)   |

Note: Wave A refers to CoMix surveys collecting behavioural data for adults whereas Wave C refers to CoMix surveys collecting behavioural data from adults responding on behalf of a randomly selected child.

## 1.14 Estonia

**Table S14. CoMix sample characteristics for Estonia**

| Characteristic         | Wave A 1    | Wave A 2    | Wave A 3    | Wave C 1    |
|------------------------|-------------|-------------|-------------|-------------|
| <b>All</b>             | 1547        | 1314        | 1111        | 297         |
| <b>Age</b>             |             |             |             |             |
| 0-4                    | NA          | NA          | NA          | 50 (16.8%)  |
| 5-11                   | NA          | NA          | NA          | 92 (31.0%)  |
| 12-15                  | NA          | NA          | NA          | 106 (35.7%) |
| 16-17                  | NA          | NA          | NA          | 49 (16.5%)  |
| 18-29                  | 242 (15.6%) | 189 (14.4%) | 166 (14.9%) | NA          |
| 30-39                  | 270 (17.5%) | 237 (18.0%) | 197 (17.7%) | NA          |
| 40-49                  | 255 (16.5%) | 225 (17.1%) | 182 (16.4%) | NA          |
| 50-59                  | 286 (18.5%) | 233 (17.7%) | 200 (18.0%) | NA          |
| 60-69                  | 271 (17.5%) | 237 (18.0%) | 201 (18.1%) | NA          |
| 70-120                 | 223 (14.4%) | 193 (14.7%) | 165 (14.9%) | NA          |
| <b>Gender</b>          |             |             |             |             |
| Female                 | 854 (55.2%) | 725 (55.2%) | 599 (53.9%) | 185 (62.3%) |
| Male                   | 687 (44.4%) | 584 (44.4%) | 509 (45.8%) | 112 (37.7%) |
| Other or Missing       | 6 (0.4%)    | 5 (0.4%)    | 3 (0.3%)    | NA          |
| <b>Day</b>             |             |             |             |             |
| Sunday                 | 214 (13.8%) | 416 (31.7%) | 113 (10.2%) | NA          |
| Monday                 | 101 (6.5%)  | 121 (9.2%)  | 59 (5.3%)   | 61 (20.5%)  |
| Tuesday                | 272 (17.6%) | 31 (2.4%)   | 111 (10.0%) | 13 (4.4%)   |
| Wednesday              | 445 (28.8%) | 79 (6.0%)   | 204 (18.4%) | 2 (0.7%)    |
| Thursday               | 492 (31.8%) | 563 (42.8%) | 403 (36.3%) | 206 (69.4%) |
| Friday                 | 17 (1.1%)   | 79 (6.0%)   | 138 (12.4%) | 11 (3.7%)   |
| Saturday               | 6 (0.4%)    | 25 (1.9%)   | 83 (7.5%)   | 4 (1.3%)    |
| <b>Data collection</b> |             |             |             |             |
| First day              | 20 Apr 21   | 06 May 21   | 25 May 21   | 08 Jun 21   |
| Last day               | 28 Apr 21   | 14 May 21   | 08 Jun 21   | 15 Jun 21   |
| <b>Household size</b>  |             |             |             |             |
| 1                      | 383 (24.8%) | 320 (24.4%) | 282 (25.4%) | NA          |
| 2                      | 664 (42.9%) | 568 (43.2%) | 489 (44.0%) | 22 (7.4%)   |
| 3-5                    | 476 (30.8%) | 405 (30.8%) | 324 (29.2%) | 256 (86.2%) |
| 6+                     | 24 (1.6%)   | 21 (1.6%)   | 16 (1.4%)   | 19 (6.4%)   |

Note: Wave A refers to CoMix surveys collecting behavioural data for adults whereas Wave C refers to CoMix surveys collecting behavioural data from adults responding on behalf of a randomly selected child.

## 1.15 Hungary

Table S15. CoMix sample characteristics for Hungary

| Characteristic         | Wave A 1    | Wave C 1    |
|------------------------|-------------|-------------|
| <b>All</b>             | 1543        | 299         |
| <b>Age</b>             |             |             |
| 0-4                    | NA          | 92 (30.8%)  |
| 5-11                   | NA          | 106 (35.5%) |
| 12-15                  | NA          | 63 (21.1%)  |
| 16-17                  | NA          | 38 (12.7%)  |
| 18-29                  | 224 (14.5%) | NA          |
| 30-39                  | 260 (16.9%) | NA          |
| 40-49                  | 307 (19.9%) | NA          |
| 50-59                  | 247 (16.0%) | NA          |
| 60-69                  | 357 (23.1%) | NA          |
| 70-120                 | 148 (9.6%)  | NA          |
| <b>Gender</b>          |             |             |
| Female                 | 713 (46.2%) | 183 (61.2%) |
| Male                   | 822 (53.3%) | 116 (38.8%) |
| Other or Missing       | 8 (0.5%)    | NA          |
| <b>Day</b>             |             |             |
| Sunday                 | 57 (3.7%)   | 35 (11.7%)  |
| Monday                 | 105 (6.8%)  | 78 (26.1%)  |
| Tuesday                | 531 (34.4%) | 35 (11.7%)  |
| Wednesday              | 157 (10.2%) | 110 (36.8%) |
| Thursday               | 544 (35.3%) | 39 (13.0%)  |
| Friday                 | 112 (7.3%)  | 2 (0.7%)    |
| Saturday               | 37 (2.4%)   | NA          |
| <b>Data collection</b> |             |             |
| First day              | 25 May 21   | 08 Jun 21   |
| Last day               | 07 Jun 21   | 16 Jun 21   |
| <b>Household size</b>  |             |             |
| 1                      | 247 (16.0%) | NA          |
| 2                      | 603 (39.1%) | 20 (6.7%)   |
| 3-5                    | 663 (43.0%) | 255 (85.3%) |
| 6+                     | 30 (1.9%)   | 24 (8.0%)   |

Note: Wave A refers to CoMix surveys collecting behavioural data for adults whereas Wave C refers to CoMix surveys collecting behavioural data from adults responding on behalf of a randomly selected child.

## 1.16 Malta

**Table S16. CoMix sample characteristics for Malta**

| Characteristic         | Wave A 1    |
|------------------------|-------------|
| <b>All</b>             | 1264        |
| <b>Age</b>             |             |
| 18-29                  | 240 (19.0%) |
| 30-39                  | 306 (24.2%) |
| 40-49                  | 262 (20.7%) |
| 50-59                  | 193 (15.3%) |
| 60-69                  | 178 (14.1%) |
| 70-120                 | 85 (6.7%)   |
| <b>Gender</b>          |             |
| Female                 | 725 (57.4%) |
| Male                   | 535 (42.3%) |
| Other or Missing       | 4 (0.3%)    |
| <b>Day</b>             |             |
| Sunday                 | 159 (12.6%) |
| Monday                 | 138 (10.9%) |
| Tuesday                | 359 (28.4%) |
| Wednesday              | 339 (26.8%) |
| Thursday               | 173 (13.7%) |
| Friday                 | 52 (4.1%)   |
| Saturday               | 44 (3.5%)   |
| <b>Data collection</b> |             |
| First day              | 27 Apr 21   |
| Last day               | 06 Jun 21   |
| <b>Household size</b>  |             |
| 1                      | 121 (9.6%)  |
| 2                      | 323 (25.6%) |
| 3-5                    | 796 (63.0%) |
| 6+                     | 24 (1.9%)   |

Note: Wave A refers to CoMix surveys collecting behavioural data for adults whereas Wave C refers to CoMix surveys collecting behavioural data from adults responding on behalf of a randomly selected child.



## 1.17 Slovakia

**Table S17. CoMix sample characteristics for Slovakia**

| Characteristic         | Wave A 1    | Wave A 2    | Wave A 3    | Wave C 1    |
|------------------------|-------------|-------------|-------------|-------------|
| <b>All</b>             | 1552        | 1321        | 1119        | 300         |
| <b>Age</b>             |             |             |             |             |
| 0-4                    | NA          | NA          | NA          | 101 (33.7%) |
| 5-11                   | NA          | NA          | NA          | 106 (35.3%) |
| 12-15                  | NA          | NA          | NA          | 60 (20.0%)  |
| 16-17                  | NA          | NA          | NA          | 33 (11.0%)  |
| 18-29                  | 270 (17.4%) | 234 (17.7%) | 173 (15.5%) | NA          |
| 30-39                  | 317 (20.4%) | 277 (21.0%) | 225 (20.1%) | NA          |
| 40-49                  | 314 (20.2%) | 268 (20.3%) | 231 (20.6%) | NA          |
| 50-59                  | 250 (16.1%) | 220 (16.7%) | 192 (17.2%) | NA          |
| 60-69                  | 298 (19.2%) | 241 (18.2%) | 222 (19.8%) | NA          |
| 70-120                 | 103 (6.6%)  | 81 (6.1%)   | 76 (6.8%)   | NA          |
| <b>Gender</b>          |             |             |             |             |
| Female                 | 752 (48.5%) | 629 (47.6%) | 547 (48.9%) | 160 (53.3%) |
| Male                   | 799 (51.5%) | 692 (52.4%) | 572 (51.1%) | 140 (46.7%) |
| Other or Missing       | 1 (0.1%)    | NA          | NA          | NA          |
| <b>Day</b>             |             |             |             |             |
| Sunday                 | 319 (20.6%) | 216 (16.4%) | 74 (6.6%)   | 60 (20.0%)  |
| Monday                 | 91 (5.9%)   | 68 (5.1%)   | 271 (24.2%) | 34 (11.3%)  |
| Tuesday                | 252 (16.2%) | 187 (14.2%) | 282 (25.2%) | 30 (10.0%)  |
| Wednesday              | 292 (18.8%) | 41 (3.1%)   | 90 (8.0%)   | 142 (47.3%) |
| Thursday               | 375 (24.2%) | 241 (18.2%) | 275 (24.6%) | 34 (11.3%)  |
| Friday                 | 86 (5.5%)   | 257 (19.5%) | 119 (10.6%) | NA          |
| Saturday               | 137 (8.8%)  | 311 (23.5%) | 8 (0.7%)    | NA          |
| <b>Data collection</b> |             |             |             |             |
| First day              | 20 Apr 21   | 06 May 21   | 25 May 21   | 08 Jun 21   |
| Last day               | 27 Apr 21   | 12 May 21   | 02 Jun 21   | 14 Jun 21   |
| <b>Household size</b>  |             |             |             |             |
| 1                      | 230 (14.8%) | 187 (14.2%) | 178 (15.9%) | NA          |
| 2                      | 530 (34.1%) | 457 (34.6%) | 397 (35.5%) | 11 (3.7%)   |
| 3-5                    | 750 (48.3%) | 643 (48.7%) | 522 (46.6%) | 273 (91.0%) |
| 6+                     | 42 (2.7%)   | 34 (2.6%)   | 22 (2.0%)   | 16 (5.3%)   |

Note: Wave A refers to CoMix surveys collecting behavioural data for adults whereas Wave C refers to CoMix surveys collecting behavioural data from adults responding on behalf of a randomly selected child.

## 1.18 Norway

Table S18. CoMix sample characteristics for Norway

| Characteristic         | Wave A 1   | Wave A 2   | Wave A 3   | Wave A 4   | Wave A 5   | Wave A 6   |
|------------------------|------------|------------|------------|------------|------------|------------|
| <b>All</b>             | 1400       | 1182       | 1012       | 931        | 768        | 645        |
| <b>Age</b>             |            |            |            |            |            |            |
| 0-4                    | NA         | NA         | NA         | NA         | NA         | NA         |
| 5-11                   | NA         | NA         | NA         | NA         | NA         | NA         |
| 12-15                  | NA         | NA         | NA         | NA         | NA         | NA         |
| 16-17                  | NA         | NA         | NA         | NA         | NA         | NA         |
| 18-29                  | 217 (16 %) | 121 (10 %) | 98 (10 %)  | 78 (8 %)   | 57 (7 %)   | 70 (11 %)  |
| 30-39                  | 281 (20 %) | 206 (17 %) | 179 (18 %) | 142 (15%)  | 121 (16 %) | 99 (15 %)  |
| 40-49                  | 228 (16 %) | 204 (17 %) | 173 (17 %) | 158 (17%)  | 136 (18 %) | 111 (17 %) |
| 50-59                  | 242 (17 %) | 229 (19 %) | 209 (21 %) | 190 (20%)  | 156 (20 %) | 139 (22 %) |
| 60-69                  | 251 (18 %) | 229 (19 %) | 197 (20 %) | 216 (23%)  | 163 (21 %) | 123 (19 %) |
| 70-120                 | 181 (13 %) | 193 (16 %) | 156 (15 %) | 147 (16 %) | 135 (18 %) | 103 (16 %) |
| NA/Other               | NA         | NA         | NA         | NA         | NA         | NA         |
| <b>Gender</b>          |            |            |            |            |            |            |
| Female                 | 698 (50 %) | 569 (48 %) | 475 (47 %) | 441 (47 %) | 345 (45 %) | 287 (45 %) |
| Male                   | 702 (50 %) | 610 (52 %) | 534 (53 %) | 487 (52 %) | 421 (55 %) | 357 (55 %) |
| Other or Missing       | 0          | 0          | 3(0.3 %)   | 3(0.3)     | 3(0.4 %)   | 2 (0.3 %)  |
| <b>Day</b>             |            |            |            |            |            |            |
| Sunday                 | 293 (21 %) | 174 (15 %) | 57 (6 %)   | 124 (13 %) | 86 (11 %)  | 15 (2 %)   |
| Monday                 | 203 (15 %) | 30 (3 %)   | 103 (10 %) | 327 (35 %) | 264 (34 %) | 129 (20 %) |
| Tuesday                | 35 (3 %)   | 158 (13 %) | 559 (55 %) | 134 (14 %) | 98 (13 %)  | 232 (36 %) |
| Wednesday              | 50 (4 %)   | 158 (13 %) | 153 (15 %) | 150 (16 %) | 70 (9 %)   | 267 (41 %) |
| Thursday               | 448 (32 %) | 490 (41 %) | 79 (8 %)   | 140 (15 %) | 85 (11 %)  | 2 (0.3 %)  |
| Friday                 | 267 (19 %) | 119 (10 %) | 36 (4 %)   | 31 (3 %)   | 67 (9 %)   | 0 (0 %)    |
| Saturday               | 104 (7 %)  | 53 (4 %)   | 25 (2 %)   | 25 (3 %)   | 98 (13 %)  | 0 (0 %)    |
| <b>Data collection</b> |            |            |            |            |            |            |
| First day              | 24 Apr 20  | 19 May 21  | 09 Jun 21  | 21 Jul 21  | 25 Aug 21  | 23 Sep 21  |
| Last day               | 30 Apr 21  | 26 May 21  | 16 Jun 21  | 27 Jul 21  | 02 Sep 21  | 30 Sep 21  |
| <b>Household size</b>  |            |            |            |            |            |            |
| 1                      | 320 (23 %) | 300 (25 %) | 278 (27 %) | 269 (29 %) | 200 (26 %) | 179 (28 %) |
| 2                      | 453 (32 %) | 458 (39 %) | 387 (38 %) | 358 (38 %) | 315 (41 %) | 251 (39 %) |
| 3-5                    | 586 (42 %) | 398 (34 %) | 328 (32 %) | 297 (32 %) | 243 (32 %) | 207 (32 %) |
| 6                      | 41 (3 %)   | 26 (2 %)   | 19 (2 %)   | 7 (0.8 %)  | 10 (1.3 %) | 8 (1.2 %)  |

Note: Wave A refers to CoMix surveys collecting behavioural data for adults whereas Wave C refers to CoMix surveys collecting behavioural data from adults responding on behalf of a randomly selected child.

## 1.19 Germany

**Table S19. CoMix sample characteristics for Germany.**

| Characteristic         | Wave 1      | Wave 2      | Wave 3      | Wave 4      | Wave 5      | Wave 6      | Wave 7      | Wave 8      | Wave 9      | Wave 10     |
|------------------------|-------------|-------------|-------------|-------------|-------------|-------------|-------------|-------------|-------------|-------------|
| <b>All</b>             | 1560        | 1356        | 1081        | 1890        | 1615        | 1496        | 1207        | 1022        | 869         | 739         |
| <b>Age</b>             |             |             |             |             |             |             |             |             |             |             |
| Under 1                | 9 (0.6%)    | 4 (0.3%)    | 2 (0.2%)    | 8 (0.4%)    | 5 (0.3%)    | 3 (0.2%)    | 4 (0.3%)    | 2 (0.2%)    | 1 (0.1%)    | NA          |
| 1-4                    | 37 (2.4%)   | 32 (2.4%)   | 19 (1.8%)   | 48 (2.5%)   | 33 (2.0%)   | 24 (1.6%)   | 26 (2.2%)   | 15 (1.5%)   | 21 (2.4%)   | 13 (1.8%)   |
| 5-9                    | 48 (3.1%)   | 41 (3.0%)   | 30 (2.8%)   | 62 (3.3%)   | 50 (3.1%)   | 60 (4.0%)   | 45 (3.7%)   | 36 (3.5%)   | 32 (3.7%)   | 15 (2.0%)   |
| 10-14                  | 73 (4.7%)   | 63 (4.6%)   | 45 (4.2%)   | 87 (4.6%)   | 74 (4.6%)   | 77 (5.1%)   | 62 (5.1%)   | 45 (4.4%)   | 47 (5.4%)   | 38 (5.1%)   |
| 15-19                  | 95 (6.1%)   | 66 (4.9%)   | 45 (4.2%)   | 108 (5.7%)  | 85 (5.3%)   | 84 (5.6%)   | 62 (5.1%)   | 57 (5.6%)   | 45 (5.2%)   | 37 (5.0%)   |
| 20-24                  | 83 (5.3%)   | 60 (4.4%)   | 28 (2.6%)   | 109 (5.8%)  | 80 (5.0%)   | 68 (4.5%)   | 65 (5.4%)   | 49 (4.8%)   | 47 (5.4%)   | 33 (4.5%)   |
| 25-34                  | 173 (11.1%) | 148 (10.9%) | 96 (8.9%)   | 219 (11.6%) | 190 (11.8%) | 181 (12.1%) | 161 (13.3%) | 135 (13.2%) | 126 (14.5%) | 92 (12.4%)  |
| 35-44                  | 137 (8.8%)  | 124 (9.1%)  | 91 (8.4%)   | 164 (8.7%)  | 145 (9.0%)  | 135 (9.0%)  | 127 (10.5%) | 99 (9.7%)   | 84 (9.7%)   | 66 (8.9%)   |
| 45-54                  | 235 (15.1%) | 209 (15.4%) | 174 (16.1%) | 275 (14.6%) | 227 (14.1%) | 229 (15.3%) | 215 (17.8%) | 166 (16.2%) | 102 (11.7%) | 104 (14.1%) |
| 55-64                  | 265 (17.0%) | 244 (18.0%) | 237 (21.9%) | 321 (17.0%) | 278 (17.2%) | 258 (17.2%) | 213 (17.6%) | 176 (17.2%) | 129 (14.8%) | 103 (13.9%) |
| 65-69                  | 270 (17.3%) | 245 (18.1%) | 199 (18.4%) | 313 (16.6%) | 297 (18.4%) | 264 (17.6%) | 186 (15.4%) | 199 (19.5%) | 145 (16.7%) | 140 (18.9%) |
| 70-74                  | 89 (5.7%)   | 73 (5.4%)   | 79 (7.3%)   | 118 (6.2%)  | 100 (6.2%)  | 79 (5.3%)   | 37 (3.1%)   | 29 (2.8%)   | 65 (7.5%)   | 65 (8.8%)   |
| 75-79                  | 35 (2.2%)   | 34 (2.5%)   | 29 (2.7%)   | 48 (2.5%)   | 39 (2.4%)   | 26 (1.7%)   | 1 (0.1%)    | 9 (0.9%)    | 18 (2.1%)   | 25 (3.4%)   |
| 80-84                  | 6 (0.4%)    | 5 (0.4%)    | 3 (0.3%)    | 5 (0.3%)    | 5 (0.3%)    | 2 (0.1%)    | NA          | 2 (0.2%)    | 4 (0.5%)    | 3 (0.4%)    |
| 85+                    | 5 (0.3%)    | 6 (0.4%)    | 4 (0.4%)    | 5 (0.3%)    | 5 (0.3%)    | 3 (0.2%)    | NA          | NA          | 3 (0.3%)    | 5 (0.7%)    |
| Prefer not to answer   | NA          | 2 (0.1%)    | NA          | NA          | 1 (0.1%)    | 2 (0.1%)    | 3 (0.2%)    | 3 (0.3%)    | NA          | NA          |
| Don't know             | NA          | NA          | NA          | NA          | 1 (0.1%)    | 1 (0.1%)    | NA          | NA          | NA          | NA          |
| <b>Gender</b>          |             |             |             |             |             |             |             |             |             |             |
| Female                 | 748 (47.9%) | 638 (47.1%) | 536 (49.6%) | 901 (47.7%) | 733 (45.4%) | 695 (46.5%) | 565 (46.8%) | 477 (46.7%) | 387 (44.5%) | 315 (42.6%) |
| Male                   | 806 (51.7%) | 717 (52.9%) | 544 (50.3%) | 985 (52.1%) | 877 (54.3%) | 797 (53.3%) | 637 (52.8%) | 544 (53.2%) | 481 (55.4%) | 424 (57.4%) |
| In another way         | 1 (0.1%)    | 1 (0.1%)    | NA          | 3 (0.2%)    | 2 (0.1%)    | 2 (0.1%)    | NA          | NA          | 1 (0.1%)    | NA          |
| Prefer not to answer   | 3 (0.2%)    | NA          | 1 (0.1%)    | 1 (0.1%)    | 1 (0.1%)    | 2 (0.1%)    | 5 (0.4%)    | 1 (0.1%)    | NA          | NA          |
| Don't know             | 2 (0.1%)    | NA          | NA          | NA          | 2 (0.1%)    | NA          | NA          | NA          | NA          | NA          |
| <b>Day</b>             |             |             |             |             |             |             |             |             |             |             |
| Sunday                 | 88 (5.6%)   | 63 (4.6%)   | 66 (6.1%)   | 81 (4.3%)   | 179 (11.1%) | 76 (5.1%)   | 108 (8.9%)  | 95 (9.3%)   | 81 (9.3%)   | NA          |
| Monday                 | 247 (15.8%) | 121 (8.9%)  | 36 (3.3%)   | 233 (12.3%) | 366 (22.7%) | 173 (11.6%) | 153 (12.7%) | 139 (13.6%) | 139 (16.0%) | 6 (0.8%)    |
| Tuesday                | 50 (3.2%)   | 60 (4.4%)   | 128 (11.8%) | 642 (34.0%) | 321 (19.9%) | 267 (17.8%) | 139 (11.5%) | 84 (8.2%)   | 269 (31.0%) | NA          |
| Wednesday              | 63 (4.0%)   | 89 (6.6%)   | 143 (13.2%) | 246 (13.0%) | NA          | 55 (3.7%)   | 241 (20.0%) | NA          | 120 (13.8%) | 31 (4.2%)   |
| Thursday               | 54 (3.5%)   | 293 (21.6%) | 87 (8.0%)   | 172 (9.1%)  | 94 (5.8%)   | 446 (29.8%) | NA          | NA          | NA          | 375 (50.7%) |
| Friday                 | 914 (58.6%) | 613 (45.2%) | 489 (45.2%) | 320 (16.9%) | 410 (25.4%) | 354 (23.7%) | 388 (32.1%) | 519 (50.8%) | 122 (14.0%) | 327 (44.2%) |
| Saturday               | 144 (9.2%)  | 117 (8.6%)  | 132 (12.2%) | 196 (10.4%) | 245 (15.2%) | 125 (8.4%)  | 178 (14.7%) | 185 (18.1%) | 138 (15.9%) | NA          |
| <b>Data collection</b> |             |             |             |             |             |             |             |             |             |             |
| First day              | 30 Apr 20   | 14 May 20   | 28 May 20   | 11 Jun 20   | 26 Jun 20   | 09 Jul 20   | 24 Jul 20   | 07 Aug 20   | 04 Sep 20   | 30 Sep 20   |
| Last day               | 06 May 20   | 21 May 20   | 04 Jun 20   | 22 Jun 20   | 01 Jul 20   | 16 Jul 20   | 29 Jul 20   | 11 Aug 20   | 09 Sep 20   | 05 Oct 20   |
| <b>Household size</b>  |             |             |             |             |             |             |             |             |             |             |
| 1                      | 232 (14.9%) | 256 (18.9%) | 268 (24.8%) | 487 (25.8%) | 374 (23.2%) | 306 (20.5%) | 277 (22.9%) | 247 (24.2%) | 194 (22.3%) | 206 (27.9%) |
| 2                      | 412 (26.4%) | 351 (25.9%) | 270 (25.0%) | 439 (23.2%) | 407 (25.2%) | 414 (27.7%) | 332 (27.5%) | 294 (28.8%) | 236 (27.2%) | 212 (28.7%) |
| 3-5                    | 863 (55.3%) | 710 (52.4%) | 521 (48.2%) | 910 (48.1%) | 803 (49.7%) | 683 (45.7%) | 534 (44.2%) | 421 (41.2%) | 388 (44.6%) | 285 (38.6%) |
| 6+                     | 53 (3.4%)   | 39 (2.9%)   | 22 (2.0%)   | 54 (2.9%)   | 31 (1.9%)   | 93 (6.2%)   | 64 (5.3%)   | 60 (5.9%)   | 51 (5.9%)   | 36 (4.9%)   |

Table S19 (continued) CoMix sample characteristics for Germany.

| Characteristic         | Wave 11     | Wave 12     | Wave 13     | Wave 14     | Wave 15     | Wave 16     | Wave 17     | Wave 18     | Wave 19     | Wave 20     |
|------------------------|-------------|-------------|-------------|-------------|-------------|-------------|-------------|-------------|-------------|-------------|
| All                    | 1499        | 1500        | 1500        | 1490        | 1500        | 1499        | 997         | 1499        | 1498        | 1493        |
| <b>Age</b>             |             |             |             |             |             |             |             |             |             |             |
| Under 1                | 1 (0.1%)    | 3 (0.2%)    | 5 (0.3%)    | 6 (0.4%)    | 7 (0.5%)    | 5 (0.3%)    | 4 (0.4%)    | 3 (0.2%)    | 5 (0.3%)    | 6 (0.4%)    |
| 1-4                    | 25 (1.7%)   | 29 (1.9%)   | 30 (2.0%)   | 36 (2.4%)   | 25 (1.7%)   | 31 (2.1%)   | 21 (2.1%)   | 33 (2.2%)   | 36 (2.4%)   | 35 (2.3%)   |
| 5-9                    | 47 (3.1%)   | 47 (3.1%)   | 56 (3.7%)   | 54 (3.6%)   | 48 (3.2%)   | 51 (3.4%)   | 34 (3.4%)   | 53 (3.5%)   | 50 (3.3%)   | 46 (3.1%)   |
| 10-14                  | 67 (4.5%)   | 69 (4.6%)   | 78 (5.2%)   | 69 (4.6%)   | 75 (5.0%)   | 61 (4.1%)   | 52 (5.2%)   | 71 (4.7%)   | 71 (4.7%)   | 64 (4.3%)   |
| 15-19                  | 81 (5.4%)   | 82 (5.5%)   | 70 (4.7%)   | 80 (5.4%)   | 84 (5.6%)   | 86 (5.7%)   | 54 (5.4%)   | 87 (5.8%)   | 83 (5.5%)   | 86 (5.8%)   |
| 20-24                  | 79 (5.3%)   | 79 (5.3%)   | 79 (5.3%)   | 99 (6.6%)   | 99 (6.6%)   | 99 (6.6%)   | 65 (6.5%)   | 82 (5.5%)   | 101 (6.7%)  | 95 (6.4%)   |
| 25-34                  | 152 (10.1%) | 156 (10.4%) | 155 (10.3%) | 173 (11.6%) | 181 (12.1%) | 186 (12.4%) | 126 (12.6%) | 168 (11.2%) | 186 (12.4%) | 182 (12.2%) |
| 35-44                  | 136 (9.1%)  | 131 (8.7%)  | 144 (9.6%)  | 138 (9.3%)  | 145 (9.7%)  | 147 (9.8%)  | 98 (9.8%)   | 160 (10.7%) | 143 (9.5%)  | 151 (10.1%) |
| 45-54                  | 206 (13.7%) | 204 (13.6%) | 211 (14.1%) | 211 (14.2%) | 212 (14.1%) | 210 (14.0%) | 135 (13.5%) | 204 (13.6%) | 204 (13.6%) | 209 (14.0%) |
| 55-64                  | 265 (17.7%) | 242 (16.1%) | 227 (15.1%) | 245 (16.4%) | 242 (16.1%) | 243 (16.2%) | 160 (16.0%) | 248 (16.5%) | 240 (16.0%) | 240 (16.1%) |
| 65-69                  | 282 (18.8%) | 292 (19.5%) | 274 (18.3%) | 257 (17.2%) | 236 (15.7%) | 233 (15.5%) | 142 (14.2%) | 246 (16.4%) | 228 (15.2%) | 223 (14.9%) |
| 70-74                  | 109 (7.3%)  | 112 (7.5%)  | 115 (7.7%)  | 85 (5.7%)   | 96 (6.4%)   | 100 (6.7%)  | 85 (8.5%)   | 106 (7.1%)  | 99 (6.6%)   | 116 (7.8%)  |
| 75-79                  | 36 (2.4%)   | 43 (2.9%)   | 43 (2.9%)   | 29 (1.9%)   | 37 (2.5%)   | 35 (2.3%)   | 16 (1.6%)   | 30 (2.0%)   | 41 (2.7%)   | 33 (2.2%)   |
| 80-84                  | 3 (0.2%)    | 3 (0.2%)    | 4 (0.3%)    | 2 (0.1%)    | 4 (0.3%)    | 4 (0.3%)    | 2 (0.2%)    | 3 (0.2%)    | 5 (0.3%)    | 4 (0.3%)    |
| 85+                    | 8 (0.5%)    | 7 (0.5%)    | 8 (0.5%)    | 5 (0.3%)    | 6 (0.4%)    | 6 (0.4%)    | 2 (0.2%)    | 4 (0.3%)    | 5 (0.3%)    | 2 (0.1%)    |
| Prefer not to answer   | 2 (0.1%)    | 1 (0.1%)    | 1 (0.1%)    | 1 (0.1%)    | 3 (0.2%)    | 1 (0.1%)    | 1 (0.1%)    | 1 (0.1%)    | 1 (0.1%)    | 1 (0.1%)    |
| Don't know             | NA          | NA          | NA          | NA          | NA          | 1 (0.1%)    | NA          | NA          | NA          | NA          |
| <b>Gender</b>          |             |             |             |             |             |             |             |             |             |             |
| Female                 | 689 (46.0%) | 690 (46.0%) | 711 (47.4%) | 701 (47.0%) | 699 (46.6%) | 708 (47.2%) | 462 (46.3%) | 711 (47.4%) | 705 (47.1%) | 714 (47.8%) |
| Male                   | 806 (53.8%) | 808 (53.9%) | 786 (52.4%) | 789 (53.0%) | 797 (53.1%) | 787 (52.5%) | 533 (53.5%) | 786 (52.4%) | 790 (52.7%) | 776 (52.0%) |
| In another way         | 2 (0.1%)    | 1 (0.1%)    | 3 (0.2%)    | NA          | 2 (0.1%)    | 2 (0.1%)    | 1 (0.1%)    | 1 (0.1%)    | 2 (0.1%)    | 1 (0.1%)    |
| Prefer not to answer   | 2 (0.1%)    | 1 (0.1%)    | NA          | NA          | 2 (0.1%)    | 1 (0.1%)    | 1 (0.1%)    | NA          | 1 (0.1%)    | 2 (0.1%)    |
| Don't know             | NA          | NA          | NA          | NA          | NA          | 1 (0.1%)    | NA          | 1 (0.1%)    | NA          | NA          |
| <b>Day</b>             |             |             |             |             |             |             |             |             |             |             |
| Sunday                 | 69 (4.6%)   | 87 (5.8%)   | 72 (4.8%)   | 88 (5.9%)   | 119 (7.9%)  | 79 (5.3%)   | 12 (1.2%)   | 139 (9.3%)  | 224 (15.0%) | 117 (7.8%)  |
| Monday                 | 134 (8.9%)  | 74 (4.9%)   | 152 (10.1%) | 148 (9.9%)  | 92 (6.1%)   | 38 (2.5%)   | NA          | 298 (19.9%) | 66 (4.4%)   | 303 (20.3%) |
| Tuesday                | 109 (7.3%)  | 4 (0.3%)    | 46 (3.1%)   | NA          | 55 (3.7%)   | 22 (1.5%)   | 11 (1.1%)   | 174 (11.6%) | 13 (0.9%)   | 113 (7.6%)  |
| Wednesday              | 41 (2.7%)   | NA          | NA          | 195 (13.1%) | 415 (27.7%) | 779 (52.0%) | NA          | 261 (17.4%) | 553 (36.9%) | 175 (11.7%) |
| Thursday               | 526 (35.1%) | 306 (20.4%) | 670 (44.7%) | 481 (32.3%) | 357 (23.8%) | 248 (16.5%) | 479 (48.0%) | 254 (16.9%) | 247 (16.5%) | 324 (21.7%) |
| Friday                 | 501 (33.4%) | 749 (49.9%) | 430 (28.7%) | 467 (31.3%) | 226 (15.1%) | 154 (10.3%) | 435 (43.6%) | 237 (15.8%) | 238 (15.9%) | 254 (17.0%) |
| Saturday               | 119 (7.9%)  | 280 (18.7%) | 130 (8.7%)  | 111 (7.4%)  | 236 (15.7%) | 179 (11.9%) | 60 (6.0%)   | 136 (9.1%)  | 157 (10.5%) | 207 (13.9%) |
| <b>Data collection</b> |             |             |             |             |             |             |             |             |             |             |
| First day              | 14 Oct 20   | 29 Oct 20   | 05 Nov 20   | 25 Nov 20   | 09 Dec 20   | 23 Dec 20   | 28 Jan 21   | 24 Feb 21   | 17 Mar 21   | 07 Apr 21   |
| Last day               | 21 Oct 20   | 03 Nov 20   | 10 Nov 20   | 30 Nov 20   | 15 Dec 20   | 30 Dec 20   | 02 Feb 21   | 03 Mar 21   | 26 Mar 21   | 15 Apr 21   |
| <b>Household size</b>  |             |             |             |             |             |             |             |             |             |             |
| 1                      | 385 (25.7%) | 371 (24.7%) | 382 (25.5%) | 405 (27.2%) | 420 (28.0%) | 424 (28.3%) | 283 (28.4%) | 420 (28.0%) | 419 (28.0%) | 422 (28.3%) |
| 2                      | 419 (28.0%) | 443 (29.5%) | 438 (29.2%) | 429 (28.8%) | 439 (29.3%) | 456 (30.4%) | 303 (30.4%) | 465 (31.0%) | 453 (30.2%) | 458 (30.7%) |
| 3-5                    | 627 (41.8%) | 628 (41.9%) | 622 (41.5%) | 606 (40.7%) | 599 (39.9%) | 573 (38.2%) | 379 (38.0%) | 572 (38.2%) | 585 (39.1%) | 576 (38.6%) |
| 6+                     | 68 (4.5%)   | 58 (3.9%)   | 58 (3.9%)   | 50 (3.4%)   | 42 (2.8%)   | 46 (3.1%)   | 32 (3.2%)   | 42 (2.8%)   | 41 (2.7%)   | 37 (2.5%)   |

Table S19 (continued) CoMix sample characteristics for Germany.

| Characteristic         | Wave 21      | Wave 22      |
|------------------------|--------------|--------------|
| <b>All</b>             | 2468         | 2441         |
| <b>Age</b>             |              |              |
| Under 1                | 19 (0.8%)    | 17 (0.7%)    |
| 1-4                    | 74 (3.0%)    | 76 (3.1%)    |
| 5-9                    | 75 (3.0%)    | 69 (2.8%)    |
| 10-14                  | 112 (4.5%)   | 100 (4.1%)   |
| 15-19                  | 147 (6.0%)   | 129 (5.3%)   |
| 20-24                  | 152 (6.2%)   | 120 (4.9%)   |
| 25-34                  | 279 (11.3%)  | 289 (11.8%)  |
| 35-44                  | 234 (9.5%)   | 244 (10.0%)  |
| 45-54                  | 353 (14.3%)  | 360 (14.7%)  |
| 55-64                  | 396 (16.0%)  | 398 (16.3%)  |
| 65-69                  | 382 (15.5%)  | 370 (15.2%)  |
| 70-74                  | 174 (7.1%)   | 180 (7.4%)   |
| 75-79                  | 52 (2.1%)    | 68 (2.8%)    |
| 80-84                  | 9 (0.4%)     | 12 (0.5%)    |
| 85+                    | 10 (0.4%)    | 9 (0.4%)     |
| Prefer not to answer   | NA           | NA           |
| Don't know             | NA           | NA           |
| <b>Gender</b>          |              |              |
| Female                 | 1165 (47.2%) | 1165 (47.7%) |
| Male                   | 1295 (52.5%) | 1271 (52.1%) |
| In another way         | 5 (0.2%)     | 4 (0.2%)     |
| Prefer not to answer   | 3 (0.1%)     | 1 (0.0%)     |
| Don't know             | NA           | NA           |
| <b>Day</b>             |              |              |
| Sunday                 | 52 (2.1%)    | 552 (22.6%)  |
| Monday                 | 327 (13.2%)  | 356 (14.6%)  |
| Tuesday                | 533 (21.6%)  | 167 (6.8%)   |
| Wednesday              | 638 (25.9%)  | 356 (14.6%)  |
| Thursday               | 595 (24.1%)  | 483 (19.8%)  |
| Friday                 | 286 (11.6%)  | 204 (8.4%)   |
| Saturday               | 37 (1.5%)    | 323 (13.2%)  |
| <b>Data collection</b> |              |              |
| First day              | 12 May 21    | 26 May 21    |
| Last day               | 24 May 21    | 03 Jun 21    |
| <b>Household size</b>  |              |              |
| 1                      | 735 (29.8%)  | 745 (30.5%)  |
| 2                      | 829 (33.6%)  | 864 (35.4%)  |
| 3-5                    | 859 (34.8%)  | 797 (32.7%)  |
| 6+                     | 45 (1.8%)    | 35 (1.4%)    |
