# Supplementary material
Source: PubMed Central journal article supplement (PMC8480062)
Supplement: 12916_2021_2133_MOESM2_ESM.pdf [file 12916_2021_2133_MOESM2_ESM.pdf]

Additional file 2 for: “SOCRATES-CoMix: A platform for timely and open-source contact mixing data during and in between COVID-19 surges and interventions in over 20 European countries”

Frederik Verelst<sup>1</sup>, Lisa Hermans<sup>2\*</sup>, Sarah Vercruyssen<sup>2</sup>, Amy Gimma<sup>3</sup>, Pietro Coletti<sup>2</sup>, Jantien A Backer<sup>4</sup>, Kerry LM Wong<sup>3</sup>, James Wambua<sup>2</sup>, Kevin van Zandvoort<sup>3</sup>, Lander Willem<sup>1</sup>, Laurens Bogaardt<sup>4</sup>, Christel Faes<sup>2</sup>, Christopher I Jarvis<sup>3</sup>, Jacco Wallinga<sup>4,5</sup>, W John Edmunds<sup>3</sup>, Philippe Beutels<sup>1,6</sup>, Niel Hens<sup>1,2</sup>

**1** Centre for Health Economics Research and Modelling Infectious Diseases, Vaccine and Infectious Disease Institute, University of Antwerp, Antwerp, Belgium

**2** Data Science Institute and I-BioStat, Hasselt University, Hasselt, Belgium

**3** London School of Hygiene and Tropical Medicine, London, UK

**4** Centre for Infectious Disease Control, National Institute for Public Health and the Environment, Bilthoven, the Netherlands

**5** Dept Biomedical Data Sciences, Leiden University Medical Center, Leiden, the Netherlands

**6** School of Public Health and Community Medicine, The University of New South Wales, Sydney, Australia

\*Corresponding author: Lisa Hermans, [lisa.hermans@uhasselt.be](mailto:lisa.hermans@uhasselt.be)

## **1 Additional file 2: Country-level ethics details.**

This additional file provides country-level details of the ethical approvals, or waivers, for the CoMix study protocol and questionnaires.

**Table S20 Country-level details of the ethical approvals, or waivers, for the CoMix study protocol and questionnaires.**

| Country         | Coordinating organization(s)                                           | Ethical Committee                                                                                 | Decision                                                                                                                                     | Date       | Reference                             |
|-----------------|------------------------------------------------------------------------|---------------------------------------------------------------------------------------------------|----------------------------------------------------------------------------------------------------------------------------------------------|------------|---------------------------------------|
| Belgium         | University of Antwerp & Hasselt University                             | Ethical Committee of the University Hospital Antwerp                                              | Approved                                                                                                                                     | 06/04/2020 | 20/13/147                             |
| The Netherlands | RIVM                                                                   | Medische Ethische Toetsingscommissie Utrecht (METC Utrecht)                                       | Waived (Medical Scientific Research Act not applicable)                                                                                      | 20/03/2020 | not applicable                        |
| UK              | LSHTM                                                                  | Observational / Interventions Research Ethics Committee                                           | Approved                                                                                                                                     | 18/03/2020 | 21795                                 |
| Austria         | Austrian National Public Health Institute                              | Ethikkommission der Stadt Wien                                                                    | Waived (Drugs Act, Medical Devices Act and Vienna Hospital Act not applicable)                                                               | 15/06/2020 | MA 15- EK/20-149-VK_NZ                |
| Denmark         | Aarhus University                                                      | The Central Denmark Region Committees on HealthResearch Ethics                                    | Waived (not considered as health research study)                                                                                             | 30/06/2020 | Request 175 / 2020                    |
| France          | Centre Hospitalier Universitaire de Poitiers                           | DCRI Centre Hospitalier Universitaire de Poitiers                                                 | Waived (not considered a 'recherche impliquant la personne humaine telles que définies par l'article R1121-1 du Code de la Santé Publique'). | 20/08/2020 | not applicable                        |
| Poland          | National Institute of Public Health - National Institute of Hygiene    | Komisja Bioetyczna Narodowego Instytutu Zdrowia Publicznego Państwowego Zaldadu Higieny, Warszawa | Approved                                                                                                                                     | 26/01/2021 | Opinia nr 5/2020 z dnia 06.08.2020 r. |
| Portugal        | Instituto Nacional de Saude Doutor Ricardo Jorge (INSA)                | Comissão de Ética para a Saúde do Instituto Nacional de Saúde Doutor Ricardo Jorge                | Approved                                                                                                                                     | 23/06/2020 | not applicable                        |
| Spain           | Institut de Investigació en Ciències de la Salut Germans Trias i Pujol | Comitè d'Ètica de la Investigación del Hospital Universitari Germans Trias i Pujol                | Approved                                                                                                                                     | 04/09/2020 | PI-20-242                             |
| Italy           | ISI Foundation                                                         | Comitato di Bioetica d'Ateneo, Università degli studi di Torino                                   | Approved                                                                                                                                     | 20/10/2020 | d65925                                |
| Finland         | Finnish Institute for Health and Welfare (THL)                         | Institutional Review Board of the Finnish Institute for Health and Welfare                        | Waived (Medical Research Act not applicable)                                                                                                 | 18/12/2020 | not applicable                        |
| Switzerland     | University of Bern                                                     | Gesundheits-, Sozial- und Integrationsdirektion Kantonale Ethikkommission für die Forschung       | Approved                                                                                                                                     | 21/12/2020 | 2020-02926                            |
| Lithuania       | Vilnius University                                                     | LITHUANIAN BIOETHICS COMMITTEE                                                                    | Waived (Law on Ethics of Biomedical Research of the Republic of Lithuania not applicable)                                                    | 20-11-2020 | No. 6B-20-298/1                       |
| Greece          | University of West Attica (UniWA)                                      | Research Ethics Committee (E.H.D.E.)University of West Attica (PADA)                              | Approved                                                                                                                                     | 25/01/2021 | 4857 / 21-01-2021                     |
| Slovenia        | National Institute of Public Health                                    | Komisija Republike Slovenije za medicinsko etiko (KME RS)                                         | Approved                                                                                                                                     | 29/12/2020 | 0120-534/2020/14                      |
| Croatia         | Croatian Institute of Public Health (CIPH)                             | Etiko povjerenstvo Hrvatskog zavoda za javno zdravstvo (HZJZ)                                     | Approved                                                                                                                                     | 16/02/2021 | Ur. broj: 381-15-21-2                 |
| Estonia         | National Institute for Health Development                              | Research Ethics Committee of the National Institute for Health Development                        | Approved                                                                                                                                     | 02/03/2021 | 673                                   |

**Table S20 (continued) Country-level details of the ethical approvals, or waivers, for the CoMix study protocol and questionnaires.**

| <b>Country</b> | <b>Coordinating organization(s)</b> | <b>Ethical Committee</b>                                                                    | <b>Decision</b> | <b>Date</b>  | <b>Reference</b>     |
|----------------|-------------------------------------|---------------------------------------------------------------------------------------------|-----------------|--------------|----------------------|
| Hungary        | University of Szeged                | Health Science Council Scientific and Research Ethics Committee (ETT TUKEB)                 | Approved        | 21/04/2021   | IV/3075- 1 /2021/EKU |
| Malta          | Ministry for Health                 | HEALTH ETHICS COMMITTEE, Directorate for Health Information & Research                      | Approved        | 09/02/2021   | HEC02/2021           |
| Slovakia       | Comenius University in Bratislava   | Eticka komisia Univerzity Komenskeho v Bratislave Jesseniova lekarska fakulta v Martine     | Approved        | 18/05/2020   | EK 2/2021            |
| Norway         | University of Bergen                | REK Regionale Komiteer For Medisinsk Og Helsefaglig Forsningsetikk                          | Approved        | 02/04/2020   | 128391               |
| Germany        | Universität Münster                 | Ethik-Kommission der Ärztekammer Westfalen-Lippe und der Westfälischen Wilhelms-Universität | Approved        | 2020-473-f-S | 2020-473-f-S         |
